# Supplementary material for: Tropospheric temperature retrievals using nonlinear calibration functions in the pure rotational Raman lidar technique
Source: Copernicus journal article supplement (doi:10.5194/amt-2016-189), 2016-06-13
Supplement: Supplementary file 1 [file 01.04.2015. Calculation of calibration coefficients A0 and B0.xlsx]

## Sheet: Лист1
				0.00427862		2.30569	1.84174e-05	0.0099177	1.83066e-05
									Det	DetA	DetB
									1.10722e-07	3.05973e-08	5.25156e-05
700	2.99	-10.5	262.65	0.00380735	3	2.04552	1.44959e-05	0.00778801
500	5.51	-26.5	246.65	0.00405433	5.52	2.22705	1.64376e-05	0.00902917
400	7.09	-37.5	235.65	0.00424358	7.08	2.32235	1.8008e-05	0.00985508		A0	B0
300	9.01	-54	219.15	0.00456308	9	2.43447	2.08217e-05	0.0111087		DetA/Det	DetB/Det
200	11.62	-61.5	211.65	0.00472478	11.616	2.49907	2.23236e-05	0.0118076
										0.276342	474.299
