# Supplementary material for: Tropospheric temperature retrievals using nonlinear calibration functions in the pure rotational Raman lidar technique
Source: Copernicus journal article supplement (doi:10.5194/amt-2016-189), 2016-06-13
Supplement: Supplementary file 2 [file 01.04.2015. Calculation of calibration coefficients A1, B1, and C1.xlsx]

## Sheet: Лист1
				0.00427862		2.30569	1.84174e-05	7.97476e-08	3.473e-10	0.0099177	4.29116e-05	1.83066e-05	3.39199e-10	6.24715e-15	6.35968e-15
												Det	DetA	DetB	DetC
												8.12787e-22	-4.13077e-21	2.4356e-18	-2.39785e-16
700	2.99	-10.5	262.65	0.00380735	3	2.04552	1.44959e-05	5.51909e-08	2.10131e-10	0.00778801	2.96517e-05
500	5.51	-26.5	246.65	0.00405433	5.52	2.22705	1.64376e-05	6.66433e-08	2.70194e-10	0.00902917	3.66072e-05
400	7.09	-37.5	235.65	0.00424358	7.08	2.32235	1.8008e-05	7.64184e-08	3.24288e-10	0.00985508	4.18208e-05		A1	B1	C1
300	9.01	-54	219.15	0.00456308	9	2.43447	2.08217e-05	9.50114e-08	4.33545e-10	0.0111087	5.06899e-05		DetA/Det	DetB/Det	DetC/Det
200	11.62	-61.5	211.65	0.00472478	11.616	2.49907	2.23236e-05	1.05474e-07	4.98341e-10	0.0118076	5.57882e-05
													-5.08222	2996.6	-295016
