# Supplementary material for: Tropospheric temperature retrievals using nonlinear calibration functions in the pure rotational Raman lidar technique
Source: Copernicus journal article supplement (doi:10.5194/amt-2016-189), 2016-06-13
Supplement: Supplementary file 3 [file 01.04.2015. Calculation of calibration coefficients A2, B2, and C2.xlsx]

## Sheet: Лист1
				0.00427862		2.30569	1.84174e-05	235.15	55634.9	0.0099177	539.252	1.83066e-05	55295.5
												Det	DetA	DetB	DetC
												-1.41712e-07	-1.557e-06	0.000110647	3.21856e-09
700	2.99	-10.5	262.65	0.00380735	3	2.04552	1.44959e-05	262.65	68985	0.00778801	537.256
500	5.51	-26.5	246.65	0.00405433	5.52	2.22705	1.64376e-05	246.65	60836.2	0.00902917	549.301
400	7.09	-37.5	235.65	0.00424358	7.08	2.32235	1.8008e-05	235.65	55530.9	0.00985508	547.261		A2	B2	C2
300	9.01	-54	219.15	0.00456308	9	2.43447	2.08217e-05	219.15	48026.7	0.0111087	533.514		DetA/Det	DetB/Det	DetC/Det
200	11.62	-61.5	211.65	0.00472478	11.616	2.49907	2.23236e-05	211.65	44795.7	0.0118076	528.928
													10.9871	-780.785	-0.022712
