# Supplementary material for: Tropospheric temperature retrievals using nonlinear calibration functions in the pure rotational Raman lidar technique
Source: Copernicus journal article supplement (doi:10.5194/amt-2016-189), 2016-06-13
Supplement: Supplementary file 4 [file 01.04.2015. Calculation of calibration coefficients A3, B3, and C3.xlsx]

## Sheet: Лист1
				2.30569		0.00427862	5.34184	12.4331	29.0647	0.0099177	0.0230955	5.31621	28.5352	152.431	154.581
												Det	DetA1	DetB1	DetC1
												1.23819e-05	1.51942e-07	-1.13989e-07	3.06745e-08
700	2.99	-10.5	262.65	2.04552	3	0.00380735	4.18416	8.55879	17.5072	0.00778801	0.0159306
500	5.51	-26.5	246.65	2.22705	5.52	0.00405433	4.95973	11.0455	24.5989	0.00902917	0.0201084
400	7.09	-37.5	235.65	2.32235	7.08	0.00424358	5.3933	12.5251	29.0877	0.00985508	0.0228869		A3 = a/c	B3 = b/c	C3 = 1/c
300	9.01	-54	219.15	2.43447	9	0.00456308	5.92664	14.4282	35.125	0.0111087	0.0270437		DetA1/DetC1	DetB1/DetC1	Det/DetC1
200	11.62	-61.5	211.65	2.49907	11.616	0.00472478	6.24536	15.6076	39.0045	0.0118076	0.029508
													4.95337	-3.71608	403.655
