# Supplementary material for: Tropospheric temperature retrievals using nonlinear calibration functions in the pure rotational Raman lidar technique
Source: Copernicus journal article supplement (doi:10.5194/amt-2016-189), 2016-06-13
Supplement: Supplementary file 5 [file 01.04.2015. Calculation of calibration coefficients A4, B4, and C4.xlsx]

## Sheet: Лист1
				2.30569		0.00427862	5.34184	0.435883	0.190977	0.0099177	0.00185481	5.31621	0.189994
												Det	DetA	DetB	DetC
												-9.18192e-08	2.39227e-09	-7.06639e-10	-2.65171e-09
700	2.99	-10.5	262.65	2.04552	3	0.00380735	4.18416	0.488873	0.238997	0.00778801	0.00186131
500	5.51	-26.5	246.65	2.22705	5.52	0.00405433	4.95973	0.449025	0.201624	0.00902917	0.0018205
400	7.09	-37.5	235.65	2.32235	7.08	0.00424358	5.3933	0.430599	0.185415	0.00985508	0.00182728		A4	B4	C4
300	9.01	-54	219.15	2.43447	9	0.00456308	5.92664	0.410767	0.16873	0.0111087	0.00187437		DetA/Det	DetB/Det	DetC/Det
200	11.62	-61.5	211.65	2.49907	11.616	0.00472478	6.24536	0.400149	0.160119	0.0118076	0.00189061
													-0.0260541	0.00769598	0.0288796
