# Supplementary material for: Tropospheric temperature retrievals using nonlinear calibration functions in the pure rotational Raman lidar technique
Source: Copernicus journal article supplement (doi:10.5194/amt-2016-189), 2016-06-13
Supplement: Supplementary file 6 [file 01.04.2015. Radiosondes data. Novosibirsk and Kolpashevo 00.00 UTC (06.00 LT, Tomsk).xlsx]

## Sheet: Лист3
	Radiosonde			Radiosonde			Constant pressure altitude charts
Altitude	Temperature	Temperature	Altitude	Temperature	Temperature	Altitude	Temperature	Temperature
km	°C	K	km	°C	K	km	°C	K
Kolpashevo (station number: 29231)			Novosibirsk (station number: 29634)				Points over Tomsk
0.075	-11.1	262.05	0.143	-8.3	264.85	0.82	-4	269.15
0.156	-8.3	264.85	0.196	-7.3	265.85	1.48	-6	267.15
0.216	-7.3	265.85	0.291	-5.4	267.75	2.99	-10.5	262.65
0.438	-4	269.15	0.493	-1.5	271.65	5.51	-26.5	246.65
0.551	-2.3	270.85	0.551	-1.8	271.35	7.09	-37.5	235.65
0.826	-4.7	268.45	0.812	-2.9	270.25	9.01	-54	219.15
0.956	-5.7	267.45	1.212	-6.1	267.05	11.62	-61.5	211.65
1.351	-4.9	268.25	1.257	-6.5	266.65	15.87	-62	211.15
1.463	-4.5	268.65	1.474	-6.7	266.45
1.5	-4.7	268.45	1.847	-7.8	265.35
1.676	-6	267.15	2.977	-11.3	261.85
1.895	-7.7	265.45	3.369	-12.1	261.05
2.049	-7.5	265.65	3.553	-13.1	260.05
2.542	-9.9	263.25	4.248	-16.8	256.35
2.945	-9.3	263.85	4.299	-17.1	256.05
3	-9.5	263.65	5.49	-26.3	246.85
3.201	-10.1	263.05	6.549	-33.6	239.55
3.523	-11.7	261.45	6.649	-34.3	238.85
3.798	-13.1	260.05	7.07	-38.3	234.85
4.361	-17.1	256.05	7.881	-44.9	228.25
5.252	-23.5	249.65	8.98	-53.9	219.25
5.53	-25.5	247.65	9.088	-55.5	217.65
5.72	-26.7	246.45	10.031	-61.4	211.75
5.991	-28.5	244.65	10.081	-61.7	211.45
6.192	-30.1	243.05	10.13	-61.5	211.65
6.903	-35.7	237.45	10.435	-61.2	211.95
7.11	-37.3	235.85	10.54	-61.1	212.05
7.771	-43.1	230.05	11.52	-58.5	214.65
8.035	-44.7	228.45	11.713	-57.7	215.45
9.03	-51.5	221.65	12.151	-57.8	215.35
10.19	-60.1	213.05	12.585	-57.9	215.25
10.315	-60.9	212.25	13.051	-58	215.15
10.896	-64.7	208.45	13.34	-58.1	215.05
11.175	-65.3	207.85	15.89	-59.7	213.45
11.56	-63.9	209.25	16.757	-60.8	212.35
12.042	-62.9	210.25
12.457	-62.1	211.05
13.34	-60.3	212.85
13.551	-59.7	213.45
14.042	-60.2	212.95
15.86	-61.9	211.25
15.985	-62.1	211.05
15.998	-62.1	211.05
