# Supplementary material for: Tropospheric temperature retrievals using nonlinear calibration functions in the pure rotational Raman lidar technique
Source: Copernicus journal article supplement (doi:10.5194/amt-2016-189), 2016-06-13
Supplement: Supplementary file 7 [file 01.04.2015. Raw lidar and smoothed signals, and their ratios.xlsx]

## Sheet: Лист1
Altitude
z, km		Raw lidar signals	Raw signals ratio	Smoothed signals	Smoothed signals	Smoothed signals ratio
0.048	789	70	11.2714	1010	96	10.5208	9.506	2.25192
0.072	1231	122	10.0902	1296.33	125.667	10.3156	9.29353	2.22932
0.096	1869	185	10.1027	1733	179.333	9.66357	9.14579	2.21329
0.12	2099	231	9.08658	2039.33	219	9.31202	9.06602	2.20453
0.144	2150	241	8.92116	2127	244.667	8.69346	8.98429	2.19548
0.168	2132	262	8.1374	2101.33	246.333	8.53045	8.93783	2.19029
0.192	2022	236	8.5678	1999.33	249.333	8.01872	8.74533	2.16852
0.216	1844	250	7.376	1914.33	236	8.11158	8.57704	2.14909
0.24	1877	222	8.45495	1882.8	223.4	8.42793	8.43575	2.13248
0.264	1850	198	9.34343	1818	220.4	8.24864	8.34125	2.12121
0.288	1821	211	8.63033	1776	209.6	8.47328	8.30479	2.11683
0.312	1698	221	7.68326	1721	204.8	8.40332	8.28875	2.1149
0.336	1634	196	8.33673	1665.8	196.8	8.46443	8.29572	2.11574
0.36	1602	198	8.09091	1600.8	197.4	8.10942	8.30562	2.11693
0.384	1574	158	9.96203	1578.4	190.8	8.27254	8.30969	2.11742
0.408	1496	214	6.99065	1554	187.4	8.29242	8.32954	2.11981
0.432	1586	188	8.43617	1538.8	184.2	8.35396	8.32789	2.11961
0.456	1512	179	8.44693	1526.8	188.6	8.09544	8.32695	2.1195
0.48	1526	182	8.38462	1502	182.714	8.22048	8.31697	2.1183
0.504	1514	180	8.41111	1503.29	177.429	8.47262	8.33372	2.12031
0.528	1458	168	8.67857	1486.57	175.571	8.46705	8.3297	2.11983
0.552	1422	168	8.46429	1494.14	176.714	8.45513	8.32041	2.11871
0.576	1505	177	8.50282	1507.14	179.571	8.393	8.30914	2.11736
0.6	1469	175	8.39429	1531.29	183.286	8.35464	8.33444	2.1204
0.624	1565	187	8.36898	1590	191.714	8.29359	8.35155	2.12245
0.648	1617	202	8.00495	1672.71	203.286	8.22839	8.35273	2.12259
0.672	1683	206	8.1699	1765.57	215.571	8.19019	8.37047	2.12471
0.696	1869	227	8.23348	1907	231.714	8.22996	8.38917	2.12694
0.72	2001	249	8.03614	2145.56	256.222	8.37381	8.42053	2.13067
0.744	2155	263	8.19392	2359.11	280.556	8.40871	8.45796	2.13511
0.768	2459	288	8.53819	2637.11	310.778	8.48552	8.49936	2.13999
0.792	2770	336	8.24405	2957.67	341.444	8.66222	8.5524	2.14621
0.816	3191	348	9.16954	3330.56	384.556	8.66079	8.59878	2.15162
0.84	3487	406	8.58867	3758.33	430.111	8.73805	8.63133	2.1554
0.864	4119	474	8.68987	4239	483.556	8.76631	8.64326	2.15678
0.888	4568	482	9.47718	4755.56	543.556	8.74898	8.64366	2.15683
0.912	5225	615	8.49593	5328.22	604.667	8.81183	8.62918	2.15515
0.936	5851	659	8.8786	5939.44	682.667	8.70036	8.59296	2.15094
0.96	6481	744	8.71102	6680.73	777.909	8.58806	8.5523	2.1462
0.984	7108	828	8.58454	7377.73	867.455	8.50503	8.49807	2.13984
1.008	7924	886	8.94357	8097.18	962.455	8.41305	8.4361	2.13252
1.032	8692	1050	8.2781	8841	1061.82	8.32628	8.36759	2.12437
1.056	9694	1126	8.60924	9623.55	1164.55	8.26378	8.28726	2.11472
1.08	10339	1287	8.03341	10427.5	1269.55	8.21361	8.20841	2.10516
1.104	11154	1391	8.01869	11233.7	1379.82	8.14145	8.1329	2.09592
1.128	12033	1519	7.92166	12053.5	1490.91	8.08463	8.06077	2.08701
1.152	12750	1575	8.09524	12867.5	1609.36	7.99537	7.99296	2.07856
1.176	13833	1745	7.92722	13689.3	1726.64	7.92829	7.92992	2.07064
1.2	14695	1814	8.10088	14465.6	1846.77	7.83293	7.86698	2.06267
1.224	15349	1957	7.84313	15246.9	1965.46	7.75743	7.80453	2.0547
1.248	16125	2050	7.86585	16037.3	2079.62	7.71167	7.74445	2.04698
1.272	16878	2189	7.71037	16832.2	2195.38	7.6671	7.68471	2.03923
1.296	17732	2340	7.57778	17590.2	2304.54	7.63286	7.62962	2.03204
1.32	18302	2508	7.29745	18338.1	2422	7.57146	7.57982	2.02549
1.344	19169	2507	7.64619	19050.5	2531.08	7.52662	7.53469	2.01952
1.368	19851	2669	7.43762	19726.9	2637.08	7.4806	7.49271	2.01393
1.392	20614	2771	7.43919	20398	2746.31	7.42743	7.45424	2.00878
1.416	21488	2896	7.41989	21053.6	2849.15	7.38943	7.4168	2.00375
1.44	21887	2938	7.44963	21620.8	2929.47	7.38046	7.37997	1.99877
1.464	22472	3102	7.24436	22202.9	3026.33	7.33656	7.34672	1.99425
1.488	23094	3163	7.3013	22756.1	3119.13	7.29564	7.31426	1.98983
1.512	23489	3192	7.35871	23293.5	3195.93	7.28849	7.28341	1.9856
1.536	24073	3377	7.12852	23764.9	3275.53	7.25527	7.25543	1.98175
1.56	24648	3387	7.27724	24232.3	3352.67	7.22776	7.23034	1.97829
1.584	25104	3469	7.23667	24647.6	3420.6	7.20564	7.20422	1.97467
1.608	25511	3434	7.42895	25016.9	3489.33	7.16955	7.18051	1.97137
1.632	25609	3642	7.03158	25354.8	3550.47	7.14126	7.1593	1.96841
1.656	26030	3732	6.97481	25660.9	3604.2	7.11971	7.13749	1.96536
1.68	26364	3660	7.20328	25838.9	3632.41	7.11342	7.11654	1.96242
1.704	26239	3701	7.08971	26068.8	3675.24	7.09309	7.09663	1.95962
1.728	26862	3826	7.02091	26294.9	3716.18	7.07579	7.07915	1.95715
1.752	26844	3790	7.08285	26471.7	3748.29	7.06233	7.06625	1.95533
1.776	27028	3927	6.88261	26617.1	3776.24	7.04859	7.05482	1.95371
1.8	26955	3855	6.99222	26724.6	3804.29	7.02485	7.04647	1.95253
1.824	27063	3908	6.92503	26805.8	3824.65	7.00871	7.03909	1.95148
1.848	27247	3930	6.93308	26869.4	3831.18	7.01334	7.03329	1.95065
1.872	27101	3758	7.21155	26895.4	3827.06	7.02768	7.02832	1.94995
1.896	27002	3891	6.9396	26901.9	3834.65	7.01548	7.02508	1.94949
1.92	27333	3888	7.03009	26818.3	3816	7.02786	7.02426	1.94937
1.944	27079	3923	6.90263	26804.1	3811.58	7.03228	7.02685	1.94974
1.968	27120	3862	7.02227	26735.4	3803.42	7.02931	7.03261	1.95056
1.992	26931	3946	6.82489	26657.9	3796.84	7.02107	7.03825	1.95136
2.016	26892	3780	7.11429	26554.3	3779.05	7.02671	7.04389	1.95216
2.04	26689	3753	7.11138	26436.4	3755.42	7.03952	7.05225	1.95335
2.064	26472	3662	7.22884	26298.6	3728.53	7.05336	7.05967	1.9544
2.088	26475	3789	6.98733	26153.1	3698.05	7.07211	7.0685	1.95565
2.112	26128	3669	7.12129	25984.6	3672.53	7.07541	7.07884	1.95711
2.136	26088	3646	7.15524	25817.3	3641.53	7.08968	7.09194	1.95896
2.16	25969	3617	7.17971	25586.9	3600	7.10746	7.10637	1.96099
2.184	25557	3671	6.96186	25375	3569.19	7.10946	7.12062	1.963
2.208	25371	3665	6.92251	25175.7	3531.24	7.12942	7.13416	1.96489
2.232	25060	3589	6.98245	24946.2	3492.38	7.14305	7.14789	1.96682
2.256	24714	3406	7.25602	24710.8	3448.76	7.16512	7.16269	1.96889
2.28	24446	3397	7.19635	24460.6	3404.19	7.18543	7.17753	1.97095
2.304	24481	3351	7.30558	24214	3364.76	7.19635	7.19171	1.97293
2.328	23901	3273	7.30247	23963.4	3327.19	7.2023	7.20656	1.97499
2.352	23822	3302	7.21442	23698.5	3280.9	7.22315	7.22237	1.97718
2.376	23582	3236	7.28739	23449.8	3239.71	7.23822	7.2385	1.97941
2.4	23214	3175	7.3115	23172.8	3195	7.25283	7.25509	1.9817
2.424	22884	3241	7.06078	22902.5	3153.09	7.26352	7.27128	1.98393
2.448	22893	3126	7.32342	22622.4	3110.57	7.27277	7.28892	1.98636
2.472	22302	3046	7.32173	22342.3	3059.17	7.30338	7.30714	1.98885
2.496	21987	3030	7.25644	22065.8	3014.26	7.32046	7.32446	1.99122
2.52	21637	2844	7.60795	21794	2966.13	7.34762	7.3425	1.99368
2.544	21511	2925	7.35419	21520.8	2922.65	7.36346	7.36093	1.99619
2.568	21210	2873	7.38253	21250.2	2875.39	7.39037	7.37994	1.99877
2.592	20911	2817	7.42315	20973.5	2833.22	7.40271	7.39916	2.00137
2.616	20905	2804	7.45542	20702.4	2792.43	7.41374	7.41828	2.00395
2.64	20544	2709	7.58361	20430.3	2747.24	7.43666	7.43695	2.00646
2.664	19985	2742	7.28848	20155.3	2703.4	7.45553	7.45443	2.00881
2.688	19872	2682	7.4094	19882.9	2660.76	7.47265	7.47212	2.01118
2.712	19527	2639	7.39939	19602.6	2619.2	7.48419	7.48865	2.01339
2.736	19114	2489	7.67939	19332.8	2573	7.51373	7.5055	2.01564
2.76	19011	2632	7.22302	19054.4	2531.88	7.52579	7.52424	2.01813
2.784	18809	2482	7.57816	18794.8	2492.72	7.53988	7.54272	2.02058
2.808	18431	2406	7.66043	18534.3	2452.24	7.5581	7.56212	2.02315
2.832	18222	2310	7.88831	18281.3	2414.28	7.57215	7.5812	2.02567
2.856	18116	2381	7.60857	18021.7	2375	7.58808	7.60157	2.02836
2.88	17666	2335	7.56574	17775.6	2332.78	7.61994	7.62226	2.03107
2.904	17405	2258	7.70815	17522.4	2293.56	7.63986	7.64279	2.03376
2.928	17197	2197	7.82749	17269.5	2251.89	7.6689	7.66414	2.03655
2.952	16947	2206	7.68223	17003.3	2213.22	7.6826	7.68512	2.03929
2.976	16773	2170	7.72949	16747	2172.59	7.70829	7.70948	2.04245
3	16206	2136	7.58708	16503.2	2131.85	7.74126	7.73319	2.04552
3.024	16140	2086	7.7373	16261.4	2097.81	7.75159	7.75641	2.04852
3.048	15932	2098	7.5939	16022.9	2060.89	7.77473	7.7787	2.05139
3.072	15812	2067	7.64973	15791.1	2027.37	7.78898	7.79948	2.05406
3.096	15474	2018	7.66799	15559.3	1984.59	7.84003	7.81958	2.05663
3.12	15312	1895	8.08021	15337.4	1954.07	7.84896	7.83754	2.05893
3.144	15021	1943	7.73083	15103.7	1917.86	7.87526	7.85449	2.06109
3.168	14873	1787	8.32289	14878.4	1886.9	7.88511	7.87205	2.06332
3.192	14527	1823	7.96873	14654.2	1855.55	7.89751	7.88904	2.06547
3.216	14374	1814	7.92393	14426.7	1825.31	7.90369	7.90715	2.06777
3.24	14082	1692	8.3227	14205.7	1796.86	7.90583	7.92218	2.06967
3.264	13717	1760	7.79375	13987.2	1764.34	7.92771	7.938	2.07166
3.288	13623	1612	8.45099	13778.2	1734.24	7.9448	7.95325	2.07358
3.312	13404	1642	8.16322	13564	1703.69	7.96154	7.96856	2.0755
3.336	13343	1763	7.56835	13354.7	1671.79	7.98824	7.98465	2.07752
3.36	13086	1642	7.96955	13161.7	1644.13	8.0053	8.00124	2.0796
3.384	12858	1584	8.11742	12964.4	1615.9	8.02302	8.01912	2.08183
3.408	12750	1477	8.63236	12768.2	1587.48	8.04302	8.03583	2.08391
3.432	12519	1543	8.11342	12574.8	1561.42	8.05347	8.05074	2.08576
3.456	12166	1541	7.89487	12380.4	1533.26	8.07454	8.06424	2.08744
3.48	12030	1432	8.40084	12191.4	1507.68	8.0862	8.0746	2.08872
3.504	11898	1508	7.88992	12005.6	1481.71	8.10252	8.08578	2.09011
3.528	11722	1401	8.36688	11823.6	1457.65	8.11143	8.09586	2.09135
3.552	11517	1504	7.65758	11637.2	1435.13	8.10881	8.10624	2.09263
3.576	11257	1510	7.45497	11455.4	1412.48	8.11012	8.115	2.09371
3.6	11069	1315	8.41749	11288.8	1393.3	8.1022	8.12316	2.09472
3.624	11136	1324	8.41088	11115.6	1367.52	8.1283	8.13357	2.096
3.648	10735	1320	8.13258	10950.1	1346.24	8.1338	8.14489	2.09739
3.672	10703	1245	8.59679	10789.8	1322.73	8.15727	8.15613	2.09877
3.696	10395	1270	8.18504	10623.6	1303.55	8.1498	8.16727	2.10014
3.72	10333	1216	8.49753	10466.4	1281.97	8.16433	8.1782	2.10147
3.744	10089	1261	8.00079	10306	1256.73	8.20067	8.19149	2.1031
3.768	10056	1205	8.34523	10154.2	1234.24	8.22708	8.20419	2.10464
3.792	9939	1290	7.70465	9999.33	1214.24	8.23504	8.21546	2.10602
3.816	9783	1194	8.19347	9850	1196.64	8.23141	8.22641	2.10735
3.84	9616	1225	7.8498	9718.6	1180.83	8.23032	8.23849	2.10882
3.864	9552	1090	8.7633	9577.34	1161.11	8.24841	8.25344	2.11063
3.888	9379	1197	7.83542	9435.37	1141.2	8.26794	8.26934	2.11255
3.912	9095	1089	8.3517	9297.54	1125.91	8.25777	8.28312	2.11422
3.936	8892	1121	7.9322	9160.57	1106.66	8.2777	8.29719	2.11592
3.96	8769	1096	8.00091	9028	1089.97	8.28279	8.31253	2.11776
3.984	8644	1096	7.88686	8899.6	1068.54	8.32873	8.32922	2.11977
4.008	8657	963	8.98962	8773.49	1047.51	8.37553	8.34497	2.12166
4.032	8620	990	8.70707	8647.26	1032.06	8.37866	8.36049	2.12352
4.056	8430	984	8.56707	8521.94	1015.74	8.38986	8.3776	2.12556
4.08	8138	979	8.31256	8415.76	1001.86	8.40009	8.39592	2.12775
4.104	8216	930	8.83441	8293.46	985.676	8.41398	8.41533	2.13006
4.128	8049	930	8.65484	8174	970.595	8.42164	8.43462	2.13235
4.152	8077	900	8.97444	8061.62	955.324	8.43862	8.4523	2.13444
4.176	7747	924	8.3842	7947.19	940.946	8.44596	8.47353	2.13695
4.2	7822	896	8.72991	7840.08	924.622	8.47923	8.49632	2.13963
4.224	7567	935	8.09305	7728.95	909.676	8.49638	8.51885	2.14228
4.248	7534	905	8.32486	7620.11	892.189	8.54091	8.54408	2.14524
4.272	7575	853	8.88042	7510.78	876.405	8.56999	8.57039	2.14831
4.296	7197	844	8.52725	7406.46	860	8.61216	8.59875	2.15162
4.32	7206	897	8.03344	7311.05	846.128	8.6406	8.62865	2.15509
4.344	7104	834	8.51799	7210.08	833.744	8.64783	8.65875	2.15857
4.368	7082	817	8.6683	7109.95	818.026	8.6916	8.68844	2.16199
4.392	7023	754	9.31432	7014.59	805.256	8.711	8.7133	2.16485
4.416	6843	774	8.84109	6918.36	790.615	8.7506	8.73615	2.16747
4.44	6651	774	8.59302	6822.54	777.513	8.77482	8.75685	2.16984
4.464	6750	753	8.96414	6735.15	764.462	8.81032	8.77619	2.17204
4.488	6551	730	8.97397	6643.31	752.949	8.82305	8.79557	2.17425
4.512	6564	788	8.32995	6548.1	742.897	8.81428	8.81355	2.17629
4.536	6210	721	8.61304	6457.72	732.051	8.8214	8.83016	2.17817
4.56	6283	687	9.14556	6373.56	721	8.83989	8.84438	2.17978
4.584	6237	705	8.84681	6287.54	710.195	8.85325	8.8575	2.18126
4.608	6099	684	8.91667	6197.73	699.439	8.861	8.87089	2.18278
4.632	6126	657	9.3242	6115.51	687.951	8.88946	8.88583	2.18446
4.656	5944	652	9.11656	6026.46	677.61	8.89371	8.90366	2.18646
4.68	5912	643	9.1944	5945.98	667.561	8.90701	8.92068	2.18837
4.704	5738	610	9.40656	5863.54	657.415	8.91908	8.93686	2.19018
4.728	5756	618	9.31392	5785.56	645.878	8.95767	8.95625	2.19235
4.752	5527	588	9.39966	5706.95	635	8.98732	8.97644	2.1946
4.776	5565	591	9.41624	5628.02	624.61	9.01047	8.99356	2.19651
4.8	5614	607	9.24876	5561.02	617.302	9.00859	9.01067	2.19841
4.824	5474	584	9.37329	5488.14	608.581	9.01792	9.02711	2.20023
4.848	5376	591	9.09645	5416.95	597.465	9.06656	9.04422	2.20213
4.872	5139	550	9.34364	5343.81	588.326	9.08309	9.05941	2.2038
4.896	5032	585	8.60171	5268.7	580.395	9.07777	9.07339	2.20535
4.92	5236	587	8.91993	5196.95	572.233	9.08189	9.08509	2.20663
4.944	5075	514	9.87354	5127.67	564.233	9.08787	9.09963	2.20823
4.968	4907	598	8.20569	5060.02	555.605	9.10724	9.11476	2.2099
4.992	4905	561	8.74332	4990.63	546.93	9.1248	9.12563	2.21109
5.016	4762	524	9.08779	4925.79	538.86	9.14112	9.136	2.21222
5.04	4703	487	9.65708	4867.09	532.556	9.13912	9.14674	2.2134
5.064	4611	536	8.60261	4799.42	523.467	9.16853	9.15659	2.21447
5.088	4534	489	9.27198	4739.36	516.022	9.1844	9.16659	2.21557
5.112	4678	459	10.1917	4676.36	509.067	9.18614	9.17469	2.21645
5.136	4426	476	9.29832	4612.27	501.489	9.19715	9.18075	2.21711
5.16	4447	512	8.68555	4552.36	495.044	9.19585	9.18636	2.21772
5.184	4442	480	9.25417	4490.36	488.6	9.19025	9.19219	2.21835
5.208	4370	462	9.45887	4432.38	481.889	9.19792	9.19569	2.21873
5.232	4311	459	9.39216	4373.78	475.6	9.19634	9.19687	2.21886
5.256	4339	427	10.1616	4320.4	470.044	9.19147	9.19771	2.21895
5.28	4271	468	9.12607	4271.06	464.106	9.20277	9.19743	2.21892
5.304	4104	467	8.78801	4215.28	458.021	9.20323	9.19729	2.21891
5.328	4063	469	8.66311	4163.36	452.191	9.20708	9.19802	2.21899
5.352	4145	419	9.8926	4107.53	446.596	9.19743	9.20124	2.21934
5.376	3959	441	8.97732	4051.4	440.596	9.19529	9.20765	2.22003
5.4	3852	476	8.09244	3998.66	434.915	9.19412	9.21724	2.22108
5.424	3938	403	9.77171	3948.26	429.426	9.19427	9.2237	2.22178
5.448	3864	430	8.98605	3900.47	424.043	9.19829	9.23368	2.22286
5.472	3742	403	9.28536	3855.79	417.596	9.2333	9.24546	2.22413
5.496	3766	380	9.91053	3805.91	410.702	9.26685	9.2588	2.22557
5.52	3763	383	9.82507	3762.27	404.673	9.29704	9.27243	2.22705
5.544	3685	408	9.03186	3714.06	400.49	9.2738	9.28805	2.22873
5.568	3525	386	9.13212	3667.04	393.755	9.313	9.30493	2.23054
5.592	3519	379	9.28496	3622.24	387.959	9.33666	9.32082	2.23225
5.616	3507	386	9.08549	3577.47	382.857	9.34414	9.3336	2.23362
5.64	3448	374	9.21925	3534.98	378.265	9.34524	9.34502	2.23484
5.664	3353	364	9.21154	3494.08	373.061	9.36597	9.3561	2.23603
5.688	3403	394	8.63706	3452.41	368.061	9.37998	9.36996	2.23751
5.712	3336	367	9.08992	3410.08	363.816	9.37309	9.38123	2.23871
5.736	3335	350	9.52857	3371.53	359.673	9.37387	9.39046	2.23969
5.76	3275	360	9.09722	3333.59	354.922	9.39246	9.39784	2.24048
5.784	3336	360	9.26667	3295.51	349.882	9.41891	9.40751	2.24151
5.808	3133	311	10.074	3252.06	345	9.42626	9.41736	2.24255
5.832	3189	350	9.11143	3212.27	340.392	9.43698	9.42621	2.24349
5.856	3134	332	9.43976	3171.59	336.039	9.43815	9.43635	2.24457
5.88	3087	314	9.83121	3130.31	332.118	9.42532	9.44768	2.24577
5.904	2941	328	8.96646	3091.04	327.039	9.45159	9.45975	2.24705
5.928	2976	325	9.15692	3053.9	322.333	9.47436	9.47517	2.24867
5.952	2995	317	9.44795	3014.92	318.118	9.47738	9.48914	2.25015
5.976	3007	333	9.03003	2975.73	313.745	9.48453	9.50507	2.25182
6	2893	297	9.74074	2944	309.943	9.49851	9.5221	2.25362
6.024	2932	282	10.3972	2909.7	305.472	9.52526	9.54083	2.25558
6.048	2892	263	10.9962	2877.83	300.132	9.58855	9.55719	2.25729
6.072	2801	267	10.4906	2843.42	296.811	9.57987	9.57269	2.25891
6.096	2672	259	10.3166	2809.85	292.321	9.61221	9.59056	2.26078
6.12	2713	309	8.77994	2779.42	288.755	9.62552	9.6094	2.26274
6.144	2603	268	9.71269	2745.85	285.094	9.63137	9.62954	2.26484
6.168	2710	277	9.78339	2711.19	281.491	9.63154	9.64902	2.26686
6.192	2568	274	9.37226	2678.36	277.698	9.64486	9.66448	2.26846
6.216	2621	262	10.0038	2648.66	273.792	9.67397	9.68352	2.27043
6.24	2607	281	9.27758	2621.53	270.491	9.69174	9.70341	2.27248
6.264	2492	244	10.2131	2592.24	266.691	9.72	9.72465	2.27466
6.288	2604	251	10.3745	2561.51	263	9.73958	9.74697	2.27696
6.312	2537	273	9.29304	2531.93	259.455	9.75865	9.77305	2.27963
6.336	2421	252	9.60714	2503.22	255.709	9.78932	9.80039	2.28242
6.36	2387	225	10.6089	2473.47	251.6	9.83097	9.82484	2.28491
6.384	2505	255	9.82353	2445.07	248	9.85916	9.84716	2.28718
6.408	2226	231	9.63636	2417.15	244.727	9.87689	9.86891	2.28939
6.432	2341	227	10.3128	2388.53	240.818	9.91838	9.89157	2.29168
6.456	2236	237	9.4346	2359.45	237.236	9.94559	9.91421	2.29397
6.48	2234	227	9.84141	2335.02	234.842	9.94293	9.93834	2.2964
6.504	2268	209	10.8517	2308.4	232.298	9.93724	9.9618	2.29876
6.528	2210	227	9.73568	2281.56	229.088	9.95934	9.98292	2.30088
6.552	2075	254	8.16929	2255.19	225.772	9.98881	10.0042	2.30301
6.576	2146	196	10.949	2228.54	222.684	10.0076	10.022	2.30478
6.6	2213	207	10.6908	2204.28	219.228	10.0547	10.034	2.30598
6.624	2057	219	9.39269	2179.25	216	10.0891	10.0467	2.30724
6.648	2141	204	10.4951	2153.21	213.368	10.0915	10.0579	2.30836
6.672	2163	193	11.2073	2126	210.263	10.1111	10.0662	2.30919
6.696	2114	227	9.31278	2103.11	207.947	10.1136	10.0714	2.3097
6.72	2085	192	10.8594	2080.71	206.458	10.0782	10.0777	2.31033
6.744	2129	214	9.9486	2056.61	203.983	10.0823	10.0807	2.31062
6.768	1987	186	10.6828	2033.1	202.085	10.0606	10.0802	2.31057
6.792	1926	192	10.0312	2009.47	199.932	10.0508	10.0807	2.31063
6.816	1945	207	9.39614	1988.29	197.915	10.0462	10.0784	2.3104
6.84	1951	179	10.8994	1966.85	195.186	10.0768	10.0782	2.31037
6.864	1918	196	9.78571	1947.05	193.017	10.0875	10.0833	2.31088
6.888	1887	170	11.1	1925.07	190.915	10.0834	10.0893	2.31147
6.912	1908	170	11.2235	1904.2	188.576	10.0978	10.0978	2.31232
6.936	1817	183	9.92896	1881.9	186.593	10.0856	10.1103	2.31355
6.96	1821	179	10.1732	1864.23	184.377	10.111	10.1269	2.3152
6.984	1774	158	11.2278	1842.52	181.803	10.1347	10.1402	2.3165
7.008	1767	168	10.5179	1822.26	179.574	10.1477	10.1551	2.31798
7.032	1774	169	10.497	1800.82	177.344	10.1544	10.1702	2.31946
7.056	1799	170	10.5824	1780.97	174.803	10.1884	10.1844	2.32085
7.08	1701	145	11.731	1762.56	172.311	10.2289	10.1996	2.32235
7.104	1737	163	10.6564	1744.2	170.623	10.2225	10.2157	2.32392
7.128	1674	172	9.73256	1724.13	168.18	10.2517	10.2301	2.32533
7.152	1652	166	9.95181	1707.67	166.607	10.2497	10.2429	2.32659
7.176	1616	166	9.73494	1688.13	164.639	10.2535	10.2571	2.32797
7.2	1659	167	9.93413	1671.1	162.984	10.2531	10.2735	2.32957
7.224	1631	143	11.4056	1653.9	160.762	10.2879	10.2861	2.3308
7.248	1568	138	11.3623	1636.13	158.952	10.2932	10.3	2.33214
7.272	1558	131	11.8931	1618.6	157.317	10.2888	10.314	2.3335
7.296	1549	141	10.9858	1601.52	155.333	10.3102	10.3301	2.33506
7.32	1511	167	9.0479	1585.6	152.921	10.3688	10.3485	2.33684
7.344	1456	156	9.33333	1568.7	151.302	10.368	10.3657	2.3385
7.368	1588	165	9.62424	1549.76	149.381	10.3746	10.3821	2.34008
7.392	1483	162	9.15432	1534.97	147.508	10.406	10.3975	2.34156
7.416	1402	166	8.44578	1518	145.587	10.4267	10.4167	2.34341
7.44	1510	136	11.1029	1504.51	143.892	10.4558	10.4353	2.34519
7.464	1505	151	9.96689	1487.34	142.431	10.4425	10.4503	2.34663
7.488	1407	140	10.05	1471.2	140.538	10.4683	10.4688	2.3484
7.512	1422	140	10.1571	1454.91	139.062	10.4623	10.4852	2.34996
7.536	1448	148	9.78378	1438.6	137	10.5007	10.5017	2.35153
7.56	1435	140	10.25	1422.69	135.308	10.5145	10.5194	2.35322
7.584	1413	153	9.23529	1407.98	133.662	10.534	10.5345	2.35465
7.608	1337	136	9.83088	1392.68	131.738	10.5715	10.5502	2.35614
7.632	1305	145	9	1377.43	130.508	10.5544	10.5661	2.35765
7.656	1391	125	11.128	1362.03	128.646	10.5874	10.5831	2.35926
7.68	1295	113	11.4602	1349.4	127.045	10.6215	10.5941	2.36029
7.704	1283	124	10.3468	1334.87	125.672	10.6219	10.605	2.36133
7.728	1256	108	11.6296	1319.15	124.269	10.6153	10.6138	2.36216
7.752	1296	115	11.2696	1305.79	122.687	10.6433	10.6209	2.36282
7.776	1326	118	11.2373	1292.12	121.328	10.6498	10.6275	2.36344
7.8	1298	100	12.98	1278.51	120.373	10.6212	10.6326	2.36393
7.824	1267	122	10.3852	1265.09	118.955	10.635	10.6361	2.36426
7.848	1281	106	12.0849	1251.58	117.731	10.6308	10.6424	2.36485
7.872	1222	135	9.05185	1238.36	116.284	10.6495	10.6519	2.36574
7.896	1149	107	10.7383	1225.57	115.328	10.6268	10.6624	2.36672
7.92	1129	107	10.5514	1214.35	114.087	10.6441	10.6756	2.36796
7.944	1174	118	9.94915	1201.48	112.71	10.6599	10.6915	2.36945
7.968	1153	97	11.8866	1189.49	111.261	10.691	10.7061	2.37081
7.992	1114	113	9.85841	1177.78	109.87	10.7198	10.7209	2.3722
8.016	1164	106	10.9811	1166.23	108.406	10.758	10.7316	2.37319
8.04	1134	102	11.1176	1153.97	106.899	10.795	10.7448	2.37442
8.064	1072	102	10.5098	1141.35	105.71	10.797	10.7618	2.37601
8.088	1081	94	11.5	1130.67	104.739	10.7951	10.7831	2.37798
8.112	1020	86	11.8605	1119.61	103.725	10.794	10.8043	2.37994
8.136	1125	101	11.1386	1108.68	102.971	10.7669	10.8274	2.38208
8.16	1072	83	12.9157	1100.06	102.127	10.7715	10.8533	2.38447
8.184	1012	91	11.1209	1089.45	100.577	10.832	10.8757	2.38653
8.208	1147	90	12.7444	1078.93	99.0423	10.8936	10.9009	2.38885
8.232	1047	98	10.6837	1067.04	97.6761	10.9243	10.9275	2.39129
8.256	1065	104	10.2404	1056.31	96.2535	10.9742	10.957	2.39398
8.28	1026	96	10.6875	1046.86	94.8028	11.0425	10.9888	2.39688
8.304	1069	80	13.3625	1035.55	93.7887	11.0413	11.0229	2.39998
8.328	953	76	12.5395	1024.62	92.5211	11.0744	11.0549	2.40287
8.352	970	85	11.4118	1014.65	91.507	11.0882	11.0859	2.40567
8.376	950	82	11.5854	1004.35	90.338	11.1177	11.1171	2.40849
8.4	960	99	9.69697	995.548	89.5479	11.1175	11.148	2.41126
8.424	917	75	12.2267	984.726	88.3425	11.1467	11.1732	2.41352
8.448	935	74	12.6351	974.479	87.137	11.1833	11.1955	2.41551
8.472	943	76	12.4079	964.603	85.863	11.2342	11.2175	2.41748
8.496	913	78	11.7051	955.658	84.8082	11.2685	11.2372	2.41923
8.52	855	76	11.25	946.671	83.6712	11.3142	11.2528	2.42062
8.544	922	77	11.974	936.534	82.7397	11.319	11.2693	2.42208
8.568	905	88	10.2841	927.712	82.1918	11.2872	11.2824	2.42325
8.592	862	94	9.17021	918.466	81.1644	11.3161	11.2919	2.42409
8.616	868	73	11.8904	909.781	80.4795	11.3045	11.2985	2.42467
8.64	869	87	9.98851	901.96	79.8933	11.2896	11.3005	2.42485
8.664	913	73	12.5068	892.467	78.9867	11.299	11.3032	2.42509
8.688	844	81	10.4198	882.533	78.16	11.2914	11.3049	2.42524
8.712	821	77	10.6623	873.507	77.3867	11.2876	11.31	2.42569
8.736	856	68	12.5882	864.733	76.48	11.3067	11.3145	2.42609
8.76	849	68	12.4853	856.293	75.84	11.2908	11.3175	2.42635
8.784	847	72	11.7639	847.733	74.7333	11.3434	11.322	2.42675
8.808	844	70	12.0571	839.293	74.0267	11.3377	11.3294	2.4274
8.832	819	65	12.6	832	73.3467	11.3434	11.3387	2.42822
8.856	813	63	12.9048	823.8	72.48	11.3659	11.3504	2.42925
8.88	760	61	12.459	816.545	72.026	11.3368	11.3612	2.4302
8.904	831	71	11.7042	809.052	71.3506	11.3391	11.3744	2.43137
8.928	795	61	13.0328	802.247	70.4935	11.3804	11.3846	2.43226
8.952	795	89	8.93258	794.039	69.6883	11.3941	11.3955	2.43321
8.976	869	74	11.7432	786.364	68.8831	11.4159	11.4027	2.43385
9	736	72	10.2222	779.455	68.2208	11.4255	11.4097	2.43447
9.024	758	57	13.2982	772.169	67.5195	11.4362	11.4192	2.4353
9.048	709	47	15.0851	765.558	66.8312	11.4551	11.426	2.43589
9.072	744	68	10.9412	757.234	66.0909	11.4575	11.4301	2.43625
9.096	721	61	11.8197	750.208	65.6753	11.423	11.4363	2.43679
9.12	731	63	11.6032	744.557	65.0633	11.4436	11.4432	2.4374
9.144	707	64	11.0469	738.152	64.519	11.4408	11.4516	2.43813
9.168	729	61	11.9508	729.342	63.8987	11.414	11.4574	2.43864
9.192	699	68	10.2794	721.975	63.1899	11.4255	11.4623	2.43906
9.216	691	57	12.1228	714.987	62.3797	11.4619	11.4668	2.43946
9.24	718	65	11.0462	708.038	61.6076	11.4927	11.4743	2.44011
9.264	648	58	11.1724	700.367	60.8101	11.5173	11.4801	2.44062
9.288	658	60	10.9667	694.38	60.3797	11.5002	11.4864	2.44117
9.312	687	52	13.2115	687.456	59.7342	11.5086	11.4941	2.44183
9.336	692	60	11.5333	681.43	59.2152	11.5077	11.4987	2.44223
9.36	684	59	11.5932	675.975	58.7531	11.5054	11.5014	2.44247
9.384	649	62	10.4677	670.111	58.2346	11.5071	11.5038	2.44267
9.408	651	57	11.4211	664.63	57.7407	11.5106	11.5047	2.44275
9.432	651	73	8.91781	658.951	57.3086	11.4983	11.5089	2.44312
9.456	608	49	12.4082	652.84	56.8889	11.4757	11.5164	2.44377
9.48	622	58	10.7241	646.79	56.284	11.4916	11.5248	2.44451
9.504	630	63	10	641.506	55.6914	11.519	11.5356	2.44544
9.528	603	54	11.1667	635.136	55.0988	11.5272	11.5508	2.44676
9.552	584	47	12.4255	628.951	54.4691	11.5469	11.5658	2.44805
9.576	581	56	10.375	623.358	53.7778	11.5914	11.5837	2.4496
9.6	621	42	14.7857	618.169	53.2892	11.6003	11.6071	2.45162
9.624	609	54	11.2778	612.675	52.7108	11.6233	11.632	2.45376
9.648	648	58	11.1724	607.518	52.0361	11.6749	11.6542	2.45566
9.672	580	52	11.1538	601.639	51.5301	11.6755	11.6792	2.45781
9.696	516	54	9.55556	595.747	50.9398	11.6951	11.7037	2.45991
9.72	582	56	10.3929	590.88	50.3614	11.7328	11.7245	2.46168
9.744	559	53	10.5472	585.47	49.759	11.7661	11.7442	2.46336
9.768	570	56	10.1786	580.181	49.3253	11.7623	11.7599	2.46469
9.792	519	54	9.61111	574.904	48.7108	11.8024	11.7736	2.46586
9.816	576	45	12.8	569.205	48.1687	11.8169	11.789	2.46717
9.84	590	47	12.5532	564.859	47.7882	11.82	11.7996	2.46806
9.864	532	44	12.0909	559.4	47.3412	11.8164	11.8124	2.46915
9.888	543	40	13.575	554.271	46.9882	11.7959	11.8216	2.46993
9.912	540	51	10.5882	549.706	46.4824	11.8261	11.8357	2.47112
9.936	520	40	13	543.894	45.9176	11.845	11.8447	2.47188
9.96	511	33	15.4848	538.329	45.5765	11.8116	11.8526	2.47255
9.984	484	44	11	532.918	44.8824	11.8737	11.8554	2.47279
10.008	531	51	10.4118	526.929	44.4	11.8678	11.8588	2.47307
10.032	564	38	14.8421	522.106	43.8118	11.917	11.8636	2.47347
10.056	490	45	10.8889	517.659	43.4941	11.9018	11.8675	2.47381
10.08	506	48	10.5417	513.345	43.1264	11.9033	11.8691	2.47394
10.104	451	41	11	509.333	42.977	11.8513	11.8743	2.47437
10.128	465	42	11.0714	504.379	42.5517	11.8533	11.8752	2.47445
10.152	513	40	12.825	499.943	42.1954	11.8483	11.876	2.47452
10.176	477	35	13.6286	495.529	41.7471	11.8698	11.8739	2.47434
10.2	463	17	27.2353	490.862	41.3793	11.8625	11.8763	2.47454
10.224	480	42	11.4286	486.195	40.9655	11.8684	11.8774	2.47464
10.248	423	34	12.4412	481.368	40.5057	11.8839	11.8844	2.47523
10.272	474	41	11.561	476.989	40.1609	11.8769	11.8889	2.4756
10.296	461	48	9.60417	472.437	39.7241	11.8929	11.8964	2.47623
10.32	460	33	13.9394	468.427	39.2697	11.9285	11.904	2.47687
10.344	485	57	8.50877	464.427	38.9775	11.9152	11.913	2.47763
10.368	473	35	13.5143	460.258	38.5843	11.9287	11.9246	2.4786
10.392	475	39	12.1795	455.764	38.2921	11.9023	11.9396	2.47986
10.416	448	42	10.6667	451.225	37.8202	11.9308	11.9537	2.48104
10.44	423	29	14.5862	446.584	37.3596	11.9537	11.9659	2.48206
10.464	427	28	15.25	442.461	36.9888	11.962	11.9755	2.48287
10.488	406	29	14	438.18	36.5281	11.9957	11.9898	2.48405
10.512	404	37	10.9189	433.888	36.0112	12.0487	12.005	2.48532
10.536	409	38	10.7632	430.067	35.7416	12.0327	12.0215	2.48669
10.56	398	35	11.3714	426.747	35.4835	12.0266	12.0386	2.48812
10.584	418	32	13.0625	422.659	35.1209	12.0344	12.0518	2.48921
10.608	412	25	16.48	418.67	34.6813	12.0719	12.0647	2.49029
10.632	441	31	14.2258	414.846	34.2967	12.0958	12.0795	2.49151
10.656	425	31	13.7097	411.385	34.044	12.0839	12.0918	2.49253
10.68	355	32	11.0938	407.934	33.6593	12.1195	12.1056	2.49367
10.704	417	29	14.3793	403.769	33.3736	12.0985	12.1226	2.49507
10.728	407	18	22.6111	399.978	33.044	12.1044	12.1438	2.49682
10.752	410	32	12.8125	395.604	32.5385	12.1581	12.1679	2.4988
10.776	409	21	19.4762	392.022	32.1758	12.1837	12.194	2.50095
10.8	371	25	14.84	388.86	31.914	12.1846	12.229	2.50381
10.824	381	28	13.6071	385.71	31.5806	12.2135	12.2594	2.50629
10.848	388	36	10.7778	382.011	31.1398	12.2676	12.2904	2.50882
10.872	355	27	13.1481	378.731	30.6989	12.337	12.3161	2.51091
10.896	377	33	11.4242	375.097	30.2903	12.3834	12.3349	2.51243
10.92	372	18	20.6667	372.043	29.8387	12.4685	12.3493	2.5136
10.944	337	23	14.6522	368.409	29.5806	12.4544	12.3656	2.51492
10.968	322	32	10.0625	364.624	29.3118	12.4395	12.3778	2.51591
10.992	335	30	11.1667	360.968	29.1398	12.3875	12.3817	2.51622
11.016	360	33	10.9091	357.505	28.914	12.3644	12.3833	2.51635
11.04	326	22	14.8182	354.674	28.7368	12.3421	12.3825	2.51629
11.064	380	30	12.6667	351.147	28.4	12.3643	12.3705	2.51532
11.088	324	29	11.1724	347.937	28.1789	12.3474	12.3612	2.51457
11.112	336	26	12.9231	344.547	27.9895	12.3099	12.3542	2.51399
11.136	360	34	10.5882	341.779	27.6632	12.355	12.3516	2.51379
11.16	313	31	10.0968	338.421	27.3474	12.3749	12.3519	2.51381
11.184	335	30	11.1667	334.768	27.1368	12.3363	12.3554	2.51409
11.208	347	24	14.4583	331.821	26.8632	12.3523	12.3553	2.51408
11.232	301	32	9.40625	328.695	26.5895	12.3618	12.3524	2.51385
11.256	323	25	12.92	325.768	26.3579	12.3594	12.3396	2.51281
11.28	279	28	9.96429	323.34	26.1443	12.3675	12.3221	2.51139
11.304	310	27	11.4815	320.732	25.9072	12.38	12.3033	2.50986
11.328	322	27	11.9259	317.495	25.6804	12.3633	12.2864	2.50849
11.352	299	18	16.6111	314.763	25.5567	12.3163	12.2728	2.50739
11.376	289	21	13.7619	311.99	25.6392	12.1685	12.2549	2.50592
11.4	292	32	9.125	309.072	25.4124	12.1623	12.237	2.50446
11.424	287	25	11.48	306.588	25.1959	12.1682	12.2251	2.50349
11.448	287	26	11.0385	303.515	24.9794	12.1506	12.2087	2.50215
11.472	288	18	16	300.67	24.6392	12.2029	12.1939	2.50094
11.496	271	18	15.0556	297.722	24.4742	12.1647	12.1866	2.50034
11.52	282	29	9.72414	295.465	24.2929	12.1626	12.1916	2.50075
11.544	270	16	16.875	292.323	23.8889	12.2368	12.1902	2.50064
11.568	269	27	9.96296	289.333	23.7172	12.1993	12.1846	2.50017
11.592	268	25	10.72	286.414	23.4747	12.2009	12.1803	2.49982
11.616	275	17	16.1765	283.657	23.1818	12.2362	12.1712	2.49907
11.64	283	31	9.12903	281.263	23.0101	12.2234	12.1673	2.49875
11.664	250	25	10	278.889	22.9596	12.1469	12.1647	2.49854
11.688	267	23	11.6087	276.475	22.8384	12.1057	12.1518	2.49747
11.712	255	19	13.4211	274.111	22.6465	12.1039	12.1377	2.49632
11.736	269	24	11.2083	271.758	22.4545	12.1026	12.1204	2.49489
11.76	267	21	12.7143	269.683	22.2475	12.1219	12.1004	2.49324
11.784	242	16	15.125	267.307	22.0297	12.1339	12.0808	2.49162
11.808	264	24	11	264.762	21.8911	12.0945	12.066	2.49039
11.832	250	12	20.8333	262.366	21.7822	12.045	12.0492	2.489
11.856	254	19	13.3684	259.475	21.604	12.0105	12.0317	2.48754
11.88	255	19	13.4211	257.099	21.396	12.0162	12.0099	2.48573
11.904	235	21	11.1905	255.01	21.2376	12.0075	11.9796	2.48321
11.928	223	23	9.69565	252.505	21.0693	11.9845	11.9458	2.48038
11.952	238	15	15.8667	249.97	20.9703	11.9202	11.9138	2.4777
11.976	254	12	21.1667	247.426	20.7723	11.9113	11.8877	2.4755
12	232	18	12.8889	245.32	20.6796	11.8629	11.8635	2.47347
12.024	235	12	19.5833	242.883	20.6019	11.7893	11.8434	2.47177
12.048	238	21	11.3333	240.835	20.4757	11.762	11.8216	2.46993
12.072	238	22	10.8182	238.728	20.3301	11.7426	11.7971	2.46785
12.096	192	28	6.85714	236.398	20.1068	11.7571	11.7829	2.46665
12.12	221	19	11.6316	234.447	19.9612	11.7451	11.7694	2.4655
12.144	237	22	10.7727	232.34	19.699	11.7945	11.7617	2.46484
12.168	209	19	11	230.214	19.5631	11.7677	11.7623	2.4649
12.192	205	19	10.7895	228.165	19.4757	11.7154	11.7596	2.46467
12.216	215	19	11.3158	226.369	19.2427	11.7639	11.7602	2.46472
12.24	189	15	12.6	224.943	19.1238	11.7625	11.7588	2.4646
12.264	221	13	17	223	18.9333	11.7782	11.7564	2.46439
12.288	212	21	10.0952	221.095	18.7429	11.7962	11.7512	2.46396
12.312	217	18	12.0556	219.343	18.6952	11.7326	11.7492	2.46378
12.336	210	19	11.0526	217.086	18.4762	11.7495	11.7537	2.46417
12.36	209	22	9.5	215.371	18.3429	11.7414	11.7483	2.46371
12.384	173	19	9.10526	213.495	18.219	11.7182	11.7387	2.46289
12.408	215	16	13.4375	211.171	17.9905	11.738	11.7316	2.46228
12.432	201	16	12.5625	209.514	17.8381	11.7453	11.7183	2.46115
12.456	212	19	11.1579	207.505	17.6381	11.7646	11.7119	2.46061
12.48	199	18	11.0556	205.991	17.5981	11.7053	11.704	2.45993
12.504	212	23	9.21739	203.925	17.4953	11.656	11.6953	2.45919
12.528	194	25	7.76	202.514	17.3084	11.7003	11.6851	2.45831
12.552	197	20	9.85	200.766	17.2336	11.6497	11.6715	2.45715
12.576	182	13	14	199.355	17.0935	11.6627	11.6597	2.45614
12.6	176	20	8.8	197.607	16.9439	11.6624	11.6458	2.45494
12.624	185	15	12.3333	195.701	16.8037	11.6463	11.638	2.45427
12.648	174	17	10.2353	194.15	16.729	11.6056	11.6355	2.45406
12.672	179	14	12.7857	192.57	16.6168	11.5889	11.6226	2.45295
12.696	193	17	11.3529	190.832	16.4299	11.6149	11.6118	2.45202
12.72	174	17	10.2353	189.404	16.3119	11.6114	11.6014	2.45112
12.744	177	18	9.83333	187.936	16.1743	11.6194	11.5868	2.44987
12.768	186	15	12.4	186.385	16.0275	11.6291	11.577	2.44902
12.792	175	13	13.4615	184.725	15.9817	11.5586	11.5715	2.44855
12.816	186	12	15.5	183.33	15.8991	11.5309	11.5635	2.44786
12.84	192	23	8.34783	181.798	15.7431	11.5478	11.5515	2.44681
12.864	167	17	9.82353	180.339	15.6789	11.502	11.5442	2.44619
12.888	170	18	9.44444	179	15.5138	11.5381	11.539	2.44573
12.912	176	19	9.26316	177.532	15.3761	11.5459	11.533	2.44521
12.936	166	8	20.75	176.101	15.3119	11.5009	11.5306	2.445
12.96	168	16	10.5	174.919	15.2342	11.482	11.5312	2.44506
12.984	158	13	12.1538	173.288	15.027	11.5318	11.5325	2.44517
13.008	161	18	8.94444	171.964	14.8739	11.5615	11.5301	2.44496
13.032	170	14	12.1429	170.532	14.7477	11.5632	11.5268	2.44468
13.056	149	13	11.4615	169.036	14.6577	11.5323	11.5182	2.44393
13.08	185	10	18.5	167.667	14.5315	11.5381	11.5091	2.44314
13.104	144	16	9	166.243	14.3784	11.562	11.5	2.44235
13.128	164	12	13.6667	165	14.3784	11.4756	11.4812	2.44071
13.152	151	8	18.875	163.613	14.2252	11.5016	11.4606	2.43892
13.176	153	12	12.75	162.387	14.1802	11.4517	11.4447	2.43752
13.2	140	15	9.33333	161.124	14.1327	11.4008	11.4281	2.43607
13.224	138	17	8.11765	159.743	14.0354	11.3815	11.4079	2.4343
13.248	158	13	12.1538	158.142	13.9646	11.3245	11.383	2.43212
13.272	160	12	13.3333	156.991	13.8496	11.3355	11.3626	2.43033
13.296	164	13	12.6154	155.903	13.6903	11.3878	11.3407	2.4284
13.32	148	13	11.3846	154.779	13.6372	11.3498	11.3279	2.42727
13.344	154	12	12.8333	153.416	13.5575	11.3159	11.3167	2.42628
13.368	160	6	26.6667	152.239	13.4867	11.2881	11.3156	2.42618
13.392	153	4	38.25	150.85	13.4071	11.2515	11.3177	2.42637
13.416	126	14	9	149.584	13.2832	11.2612	11.3158	2.4262
13.44	137	8	17.125	148.409	13.1217	11.3101	11.3101	2.4257
13.464	165	11	15	147.2	13.0522	11.2778	11.3102	2.4257
13.488	138	15	9.2	146.513	12.887	11.3691	11.315	2.42613
13.512	131	10	13.1	145.348	12.8087	11.3476	11.3158	2.4262
13.536	160	13	12.3077	144.043	12.7304	11.3149	11.3138	2.42602
13.56	142	17	8.35294	142.896	12.6174	11.3253	11.3084	2.42554
13.584	143	7	20.4286	141.835	12.4957	11.3507	11.3004	2.42484
13.608	144	15	9.6	140.583	12.3652	11.3692	11.2951	2.42437
13.632	139	13	10.6923	139.583	12.3565	11.2963	11.2817	2.42318
13.656	116	10	11.6	138.565	12.3391	11.2297	11.2717	2.42229
13.68	139	15	9.26667	137.863	12.3077	11.2014	11.2684	2.422
13.704	124	9	13.7778	136.88	12.1966	11.2228	11.2636	2.42158
13.728	126	13	9.69231	135.684	12.094	11.2191	11.2569	2.42098
13.752	127	18	7.05556	134.658	12	11.2215	11.253	2.42063
13.776	126	13	9.69231	133.598	11.8889	11.2372	11.2503	2.4204
13.8	150	12	12.5	132.846	11.7778	11.2794	11.2556	2.42087
13.824	136	17	8	131.701	11.6838	11.2721	11.2673	2.4219
13.848	128	13	9.84615	130.598	11.5812	11.2768	11.2834	2.42333
13.872	123	11	11.1818	129.53	11.4359	11.3266	11.3062	2.42535
13.896	118	12	9.83333	128.462	11.4017	11.2669	11.3279	2.42727
13.92	133	10	13.3	127.58	11.3025	11.2877	11.3519	2.42938
13.944	120	9	13.3333	126.437	11.1597	11.3298	11.3716	2.43112
13.968	106	12	8.83333	125.496	11.0084	11.4	11.3923	2.43294
13.992	114	12	9.5	124.538	10.8571	11.4706	11.4122	2.43468
14.016	112	8	14	123.647	10.7899	11.4595	11.4282	2.43608
14.04	127	10	12.7	122.84	10.6807	11.5012	11.4504	2.43802
14.064	118	10	11.8	121.924	10.605	11.4968	11.4719	2.4399
14.088	107	13	8.23077	120.983	10.521	11.4992	11.4914	2.4416
14.112	119	9	13.2222	120.076	10.4454	11.4956	11.5031	2.44262
14.136	115	12	9.58333	119.084	10.3529	11.5024	11.508	2.44304
14.16	111	9	12.3333	118.157	10.2645	11.5113	11.5056	2.44283
14.184	123	9	13.6667	117.248	10.1736	11.5248	11.5031	2.44261
14.208	108	10	10.8	116.298	10.0744	11.5439	11.5032	2.44263
14.232	119	10	11.9	115.289	10	11.5289	11.5045	2.44274
14.256	110	10	11	114.289	9.91736	11.5242	11.5107	2.44328
14.28	111	12	9.25	113.289	9.90909	11.4329	11.5205	2.44413
14.304	102	8	12.75	112.273	9.78512	11.4738	11.5229	2.44434
14.328	103	8	12.875	111.372	9.68595	11.4983	11.5244	2.44447
14.352	108	9	12	110.57	9.60331	11.5138	11.5232	2.44436
14.376	89	9	9.88889	109.711	9.4876	11.5636	11.531	2.44504
14.4	117	10	11.7	109.114	9.39837	11.6099	11.5318	2.44511
14.424	109	4	27.25	108.252	9.38211	11.5381	11.54	2.44582
14.448	104	16	6.5	107.439	9.30894	11.5415	11.5357	2.44545
14.472	110	7	15.7143	106.675	9.25203	11.5299	11.5301	2.44496
14.496	114	7	16.2857	105.951	9.12195	11.615	11.5216	2.44422
14.52	97	12	8.08333	105.114	9.11382	11.5335	11.5136	2.44353
14.544	85	11	7.72727	104.358	9.05691	11.5224	11.4933	2.44176
14.568	98	8	12.25	103.309	9.04065	11.4272	11.4772	2.44037
14.592	74	11	6.72727	102.65	8.97561	11.4366	11.4603	2.43889
14.616	105	8	13.125	101.943	8.92683	11.4199	11.4501	2.438
14.64	100	5	20	101.352	8.832	11.4755	11.4291	2.43616
14.664	111	9	12.3333	100.568	8.832	11.3868	11.4117	2.43464
14.688	100	3	33.3333	99.8	8.784	11.3616	11.3952	2.43319
14.712	99	10	9.9	99.104	8.728	11.3547	11.3896	2.4327
14.736	78	3	26	98.472	8.624	11.4184	11.381	2.43194
14.76	95	7	13.5714	97.624	8.576	11.3834	11.3755	2.43146
14.784	81	5	16.2	96.816	8.536	11.3421	11.3583	2.42995
14.808	83	3	27.6667	95.992	8.464	11.3412	11.3412	2.42844
14.832	99	14	7.07143	95.288	8.384	11.3655	11.33	2.42746
14.856	113	9	12.5556	94.544	8.336	11.3417	11.3189	2.42647
14.88	87	10	8.7	93.8268	8.25984	11.3594	11.2961	2.42446
14.904	87	13	6.69231	93.1339	8.25197	11.2863	11.2784	2.42289
14.928	77	6	12.8333	92.3228	8.24409	11.1987	11.2643	2.42164
14.952	83	5	16.6	91.7717	8.16535	11.2392	11.2507	2.42043
14.976	71	4	17.75	91.1811	8.11811	11.2318	11.2383	2.41933
15	74	14	5.28571	90.315	8.08661	11.1685	11.2294	2.41854
15.024	104	11	9.45455	89.685	8.01575	11.1886	11.2144	2.4172
15.048	94	5	18.8	89.0551	7.96063	11.1869	11.2079	2.41662
15.072	101	16	6.3125	88.2992	7.88976	11.1916	11.211	2.41689
15.096	97	8	12.125	87.5354	7.79528	11.2293	11.2124	2.41702
15.12	77	6	12.8333	87.0698	7.74419	11.2432	11.2201	2.41771
15.144	90	8	11.25	86.2558	7.70543	11.1942	11.2316	2.41873
15.168	85	9	9.44444	85.5504	7.62791	11.2154	11.2423	2.41968
15.192	85	6	14.1667	84.8915	7.55814	11.2318	11.2623	2.42146
15.216	81	5	16.2	84.3721	7.49612	11.2554	11.2776	2.42282
15.24	72	4	18	83.7752	7.4031	11.3162	11.2933	2.42421
15.264	87	2	43.5	83.2636	7.37209	11.2944	11.3069	2.42541
15.288	74	14	5.28571	82.5659	7.30233	11.3068	11.3292	2.42738
15.312	83	1	83	81.969	7.18605	11.4067	11.3499	2.42921
15.336	69	10	6.9	81.3721	7.16279	11.3604	11.373	2.43125
15.36	76	6	12.6667	80.855	7.0916	11.4015	11.3994	2.43356
15.384	82	7	11.7143	80.0992	7.03053	11.3931	11.418	2.43519
15.408	83	2	41.5	79.374	6.93893	11.4389	11.4391	2.43704
15.432	76	5	15.2	78.7939	6.8855	11.4435	11.4569	2.43859
15.456	80	7	11.4286	78.2137	6.80916	11.4865	11.4638	2.43919
15.48	76	6	12.6667	77.7328	6.73282	11.5454	11.4752	2.44019
15.504	62	7	8.85714	77.1298	6.69466	11.5211	11.4788	2.44051
15.528	71	5	14.2	76.5496	6.64122	11.5264	11.4825	2.44082
15.552	75	6	12.5	76.0382	6.61069	11.5023	11.479	2.44052
15.576	65	3	21.6667	75.5573	6.58015	11.4826	11.4796	2.44057
15.6	61	7	8.71429	75.218	6.54887	11.4856	11.4739	2.44007
15.624	64	6	10.6667	74.7594	6.53383	11.4419	11.4625	2.43908
15.648	62	6	10.3333	74.0977	6.4812	11.4327	11.4565	2.43855
15.672	64	6	10.6667	73.5489	6.45113	11.4009	11.4431	2.43738
15.696	54	3	18	73.0902	6.38346	11.4499	11.4326	2.43647
15.72	65	11	5.90909	72.5789	6.35338	11.4237	11.4243	2.43575
15.744	69	8	8.625	72.0451	6.30827	11.4207	11.4148	2.43491
15.768	58	5	11.6	71.6541	6.25564	11.4543	11.4077	2.43429
15.792	73	8	9.125	71.0977	6.24812	11.3791	11.4075	2.43427
15.816	72	5	14.4	70.5489	6.19549	11.3871	11.4102	2.43451
15.84	69	3	23	70.037	6.14815	11.3916	11.411	2.43458
15.864	77	5	15.4	69.4667	6.1037	11.3811	11.4129	2.43474
15.888	60	6	10	68.9407	6.06667	11.3639	11.4196	2.43534
15.912	68	7	9.71429	68.4963	5.99259	11.4302	11.4206	2.43542
15.936	64	6	10.6667	68.0741	5.95556	11.4303	11.4194	2.43531
15.96	72	2	36	67.6519	5.9037	11.4592	11.4156	2.43498
15.984	67	13	5.15385	67.1407	5.86667	11.4444	11.4194	2.43531
16.008	56	6	9.33333	66.7556	5.80741	11.4949	11.4212	2.43547
16.032	56	8	7	66.1556	5.77037	11.4647	11.4194	2.43532
16.056	63	8	7.875	65.5852	5.77037	11.3659	11.4168	2.43509
16.08	77	6	12.8333	65.0073	5.72993	11.3452	11.4144	2.43487
16.104	60	1	60	64.5109	5.64234	11.4334	11.4062	2.43416
16.128	70	5	14	63.9124	5.60584	11.401	11.4009	2.43369
16.152	53	8	6.625	63.4307	5.59124	11.3446	11.3908	2.4328
16.176	57	6	9.5	63	5.52555	11.4016	11.3805	2.4319
16.2	53	8	6.625	62.5912	5.48905	11.4029	11.3756	2.43147
16.224	59	4	14.75	62.1606	5.46715	11.3698	11.3677	2.43078
16.248	52	7	7.42857	61.8321	5.43066	11.3858	11.3485	2.42909
16.272	59	7	8.42857	61.3212	5.38686	11.3835	11.3378	2.42814
16.296	61	4	15.25	60.8175	5.35766	11.3515	11.3247	2.42699
16.32	60	3	20	60.5468	5.35252	11.3118	11.3065	2.42538
16.344	61	6	10.1667	60.0216	5.33094	11.2591	11.2874	2.42369
16.368	54	3	18	59.5827	5.30935	11.2222	11.2688	2.42204
16.392	44	4	11	59.1727	5.2446	11.2826	11.2557	2.42088
16.416	72	5	14.4	58.9065	5.25899	11.2011	11.2381	2.41931
16.44	50	3	16.6667	58.5036	5.22302	11.2011	11.227	2.41832
16.464	56	4	14	58.3022	5.20863	11.1934	11.2189	2.4176
16.488	62	2	31	57.9928	5.19424	11.1648	11.2256	2.4182
16.512	55	7	7.85714	57.5036	5.11511	11.2419	11.2366	2.41918
16.536	58	6	9.66667	56.9137	5.08633	11.1895	11.2378	2.41929
16.56	51	3	17	56.5461	5.03546	11.2296	11.2467	2.42008
16.584	64	4	16	56.1915	5.00709	11.2224	11.2681	2.42198
16.608	45	5	9	55.7801	4.92199	11.3329	11.295	2.42436
16.632	55	5	11	55.5106	4.89362	11.3435	11.319	2.42649
16.656	60	4	15	55.1986	4.88652	11.2961	11.3461	2.42888
16.68	38	2	19	54.9716	4.86525	11.2988	11.3771	2.4316
16.704	53	5	10.6	54.6667	4.78014	11.4362	11.4042	2.43398
16.728	54	4	13.5	54.1064	4.70922	11.4895	11.4348	2.43666
16.752	49	2	24.5	53.6596	4.69504	11.429	11.4575	2.43864
16.776	62	3	20.6667	53.1986	4.60993	11.54	11.4825	2.44082
16.8	58	5		52.8951	4.58741	11.5305	11.5067	2.44293
16.824	36	4		52.4755	4.55245	11.5269	11.527	2.44469
16.848	50	3		52.1399	4.51049	11.5597	11.5304	2.44499
16.872	49	10		51.7552	4.46853	11.5822	11.5213	2.44419
16.896	39	2		51.3497	4.41958	11.6187	11.5269	2.44468
16.92	56	3		50.9371	4.40559	11.5619	11.5256	2.44457
16.944	51	4		50.6014	4.39161	11.5223	11.5251	2.44452
16.968	41	5		50.3077	4.38462	11.4737	11.5248	2.4445
16.992	52	6		49.9371	4.38462	11.3892	11.5199	2.44407
17.016	47	1		49.5804	4.31469	11.4911	11.5095	2.44317
17.04	55	2
17.064	54	5
17.088	44	2
17.112	39	8
17.136	51	8
17.16	50	5
17.184	56	4
17.208	51	6
17.232	39	3
17.256	45	6
17.28	46	4
17.304	51	5
17.328	44	6
17.352	59	2
17.376	49	8
17.4	35	3
17.424	40	1
17.448	32	5
17.472	42	4
17.496	39	5
17.52	51	2
17.544	45	3
17.568	46	1
17.592	39	4
17.616	37	1
17.64	36	5
17.664	32	4
17.688	29	4
17.712	23	2
17.736	36	4
17.76	28	2
17.784	48	5
17.808	38	3
17.832	29	6
17.856	39	5
17.88	29	6
17.904	35	2
17.928	31	1
17.952	43	4
17.976	41	6
18	38	6
18.024	39	0
18.048	42	1
18.072	41	5
18.096	39	2
18.12	53	3
18.144	40	1
18.168	31	3
18.192	31	5
18.216	31	1
18.24	31	2
18.264	37	6
18.288	29	1
18.312	39	2
18.336	39	4
18.36	39	1
18.384	31	2
18.408	25	1
18.432	31	3
18.456	36	4
18.48	32	0
18.504	31	6
18.528	37	3
18.552	29	0
18.576	35	2
18.6	27	2
18.624	26	4
18.648	33	3
18.672	30	3
18.696	34	2
18.72	23	4
18.744	19	2
18.768	36	0
18.792	33	0
18.816	24	5
18.84	26	2
18.864	20	5
18.888	34	6
18.912	22	2
18.936	28	2
18.96	22	5
18.984	18	4
19.008	31	1
19.032	31	2
19.056	32	2
19.08	24	1
19.104	28	4
19.128	31	3
19.152	28	1
19.176	23	0
19.2	24	0
19.224	25	2
19.248	21	5
19.272	40	3
19.296	24	1
19.32	27	2
19.344	22	3
19.368	20	3
19.392	21	2
19.416	30	1
19.44	33	3
19.464	30	5
19.488	24	1
19.512	28	1
19.536	23	3
19.56	28	1
19.584	24	3
19.608	25	1
19.632	20	1
19.656	19	5
19.68	21	2
19.704	23	2
19.728	16	1
19.752	32	4
19.776	16	1
19.8	20	3
19.824	27	3
19.848	31	3
19.872	21	1
19.896	25	2
19.92	23	2
19.944	16	2
19.968	24	1
19.992	25	1
20.016	19	5
