# Supplementary material for: Tropospheric temperature retrievals using nonlinear calibration functions in the pure rotational Raman lidar technique
Source: Copernicus journal article supplement (doi:10.5194/amt-2016-189), 2016-06-13
Supplement: Supplementary file 10 [file 01.04.2015. Temperature profile retrieved using Eq. (15).xlsx]

## Sheet: Лист1
z, km
Altitude	Smoothed signals	Smoothed signals	Smoothed ratio
0.048	1010	96	9.506	243.322	1.5803	0.0122842	A2	0.075	262.05	0.143	264.85	0.82	269.15
0.072	1296.33	125.667	9.29353	245.664	1.09404	0.00848034	10.9871	0.156	264.85	0.196	265.85	1.48	267.15
0.096	1733	179.333	9.14579	247.289	0.886706	0.00698668		0.216	265.85	0.291	267.75	2.99	262.65	3	0.311655
0.12	2039.33	219	9.06602	248.166	0.78814	0.00627189	B2	0.438	269.15	0.493	271.65	5.51	246.65	5.52	0.753625
0.144	2127	244.667	8.98429	249.065	0.726338	0.00590965	-780.785	0.551	270.85	0.551	271.35	7.09	235.65	7.08	0.0754548
0.168	2101.33	246.333	8.93783	249.576	0.716701	0.00586193		0.826	268.45	0.812	270.25	9.01	219.15	9	1.89751
0.192	1999.33	249.333	8.74533	251.693	0.686556	0.00570607	C2	0.956	267.45	1.212	267.05	11.62	211.65	11.616	1.55265
0.216	1914.33	236	8.57704	253.548	0.695859	0.00571459	-0.022712	1.351	268.25	1.257	266.65
0.24	1882.8	223.4	8.43575	255.109	0.551942	0.00443729		1.463	268.65	1.474	266.45
0.264	1818	220.4	8.34125	256.155	0.54753	0.00442109		1.5	268.45	1.847	265.35
0.288	1776	209.6	8.30479	256.56	0.563508	0.00449523		1.676	267.15	2.977	261.85
0.312	1721	204.8	8.28875	256.738	0.567973	0.00454239		1.895	265.45	3.369	261.05
0.336	1665.8	196.8	8.29572	256.66	0.580888	0.00463394		2.049	265.65	3.553	260.05
0.36	1600.8	197.4	8.30562	256.55	0.573963	0.00465887		2.542	263.25	4.248	256.35
0.384	1578.4	190.8	8.30969	256.505	0.587162	0.00472921		2.945	263.85	4.299	256.05
0.408	1554	187.4	8.32954	256.285	0.593961	0.00478354		3	263.65	5.49	246.85
0.432	1538.8	184.2	8.32789	256.303	0.60018	0.00481922		3.201	263.05	6.549	239.55
0.456	1526.8	188.6	8.32695	256.314	0.588115	0.00478145		3.523	261.45	6.649	238.85
0.48	1502	182.714	8.31697	256.425	0.506599	0.00409183		3.798	260.05	7.07	234.85
0.504	1503.29	177.429	8.33372	256.239	0.519042	0.00414582		4.361	256.05	7.881	228.25
0.528	1486.57	175.571	8.3297	256.283	0.521491	0.00416573		5.252	249.65	8.98	219.25
0.552	1494.14	176.714	8.32041	256.386	0.519152	0.00414765		5.53	247.65	9.088	217.65
0.576	1507.14	179.571	8.30914	256.511	0.513459	0.00411201		5.72	246.45	10.031	211.75
0.6	1531.29	183.286	8.33444	256.231	0.508836	0.00408679		5.991	244.65	10.081	211.45
0.624	1590	191.714	8.35155	256.041	0.497369	0.00400922		6.192	243.05	10.13	211.65
0.648	1672.71	203.286	8.35273	256.028	0.482044	0.00389804		6.903	237.45	10.435	211.95
0.672	1765.57	215.571	8.37047	255.831	0.468317	0.00379696		7.11	235.85	10.54	212.05
0.696	1907	231.714	8.38917	255.624	0.453109	0.00366957		7.771	230.05	11.52	214.65
0.72	2145.56	256.222	8.42053	255.277	0.382924	0.00308423		8.035	228.45	11.713	215.45
0.744	2359.11	280.556	8.45796	254.863	0.367678	0.00296141		9.03	221.65	12.151	215.35
0.768	2637.11	310.778	8.49936	254.405	0.351601	0.00282696		10.19	213.05	12.585	215.25
0.792	2957.67	341.444	8.5524	253.82	0.339012	0.00271035		10.315	212.25	13.051	215.15
0.816	3330.56	384.556	8.59878	253.308	0.320916	0.00257102		10.896	208.45	13.34	215.05
0.84	3758.33	430.111	8.63133	252.949	0.305138	0.00243977		11.175	207.85	15.89	213.45
0.864	4239	483.556	8.64326	252.817	0.288368	0.00230404		11.56	209.25	16.757	212.35
0.888	4755.56	543.556	8.64366	252.813	0.27186	0.00217382		12.042	210.25
0.912	5328.22	604.667	8.62918	252.973	0.257848	0.00205487		12.457	211.05
0.936	5939.44	682.667	8.59296	253.372	0.241003	0.00192693		13.34	212.85
0.96	6680.73	777.909	8.5523	253.821	0.202707	0.00162598		13.551	213.45
0.984	7377.73	867.455	8.49807	254.42	0.19045	0.00152981		14.042	212.95
1.008	8097.18	962.455	8.4361	255.105	0.179204	0.00144171		15.86	211.25
1.032	8841	1061.82	8.36759	255.863	0.169026	0.00136132		15.985	211.05
1.056	9623.55	1164.55	8.28726	256.754	0.159851	0.00128679		15.998	211.05
1.08	10427.5	1269.55	8.20841	257.631	0.151726	0.00122017
1.104	11233.7	1379.82	8.1329	258.472	0.144185	0.00115982
1.128	12053.5	1490.91	8.06077	259.277	0.137542	0.00110605
1.152	12867.5	1609.36	7.99296	260.036	0.131184	0.00105655
1.176	13689.3	1726.64	7.92992	260.743	0.125654	0.00101272
1.2	14465.6	1846.77	7.86698	261.451	0.110776	0.000894802
1.224	15246.9	1965.46	7.80453	262.155	0.106511	0.000861464
1.248	16037.3	2079.62	7.74445	262.834	0.102844	0.000831682
1.272	16832.2	2195.38	7.68471	263.511	0.0994265	0.00080391
1.296	17590.2	2304.54	7.62962	264.137	0.0964727	0.000779628
1.32	18338.1	2422	7.57982	264.704	0.0934993	0.000756528
1.344	19050.5	2531.08	7.53469	265.22	0.0909671	0.000736442
1.368	19726.9	2637.08	7.49271	265.7	0.088657	0.000718296
1.392	20398	2746.31	7.45424	266.141	0.0864254	0.000701168
1.416	21053.6	2849.15	7.4168	266.571	0.0844681	0.000685674
1.44	21620.8	2929.47	7.37997	266.995	0.0772928	0.000626757
1.464	22202.9	3026.33	7.34672	267.379	0.0757112	0.000614614
1.488	22756.1	3119.13	7.31426	267.754	0.0742616	0.000603445
1.512	23293.5	3195.93	7.28341	268.111	0.0731633	0.000593978
1.536	23764.9	3275.53	7.25543	268.435	0.0720122	0.000585075
1.56	24232.3	3352.67	7.23034	268.727	0.0709588	0.000576835
1.584	24647.6	3420.6	7.20422	269.03	0.0700431	0.000569502
1.608	25016.9	3489.33	7.18051	269.307	0.0691182	0.000562628
1.632	25354.8	3550.47	7.1593	269.554	0.0683267	0.00055663
1.656	25660.9	3604.2	7.13749	269.809	0.0676395	0.000551237
1.68	25838.9	3632.41	7.11654	270.054	0.0631698	0.000514541
1.704	26068.8	3675.24	7.09663	270.287	0.0626504	0.000510508
1.728	26294.9	3716.18	7.07915	270.492	0.0621748	0.00050679
1.752	26471.7	3748.29	7.06625	270.643	0.0618111	0.000503963
1.776	26617.1	3776.24	7.05482	270.778	0.0614918	0.00050154
1.8	26724.6	3804.29	7.04647	270.876	0.061163	0.000499417
1.824	26805.8	3824.65	7.03909	270.963	0.0609231	0.000497803
1.848	26869.4	3831.18	7.03329	271.031	0.0608565	0.000496989
1.872	26895.4	3827.06	7.02832	271.089	0.0609038	0.000496821
1.896	26901.9	3834.65	7.02508	271.127	0.0607964	0.000496255
1.92	26818.3	3816	7.02426	271.137	0.0576752	0.000470395
1.944	26804.1	3811.58	7.02685	271.107	0.057731	0.000470774
1.968	26735.4	3803.42	7.03261	271.039	0.0578109	0.000471631
1.992	26657.9	3796.84	7.03825	270.972	0.0578654	0.000472434
2.016	26554.3	3779.05	7.04389	270.906	0.0580405	0.000473813
2.04	26436.4	3755.42	7.05225	270.808	0.0582923	0.00047566
2.064	26298.6	3728.53	7.05967	270.721	0.0585701	0.000477669
2.088	26153.1	3698.05	7.0685	270.617	0.058898	0.000479968
2.112	25984.6	3672.53	7.07884	270.496	0.0591576	0.000482201
2.136	25817.3	3641.53	7.09194	270.342	0.0595048	0.00048488
2.16	25586.9	3600	7.10637	270.173	0.0570322	0.000464513
2.184	25375	3569.19	7.12062	270.006	0.0573457	0.000467299
2.208	25175.7	3531.24	7.13416	269.848	0.0577621	0.000470392
2.232	24946.2	3492.38	7.14789	269.687	0.0581776	0.000473664
2.256	24710.8	3448.76	7.16269	269.514	0.0586658	0.000477304
2.28	24460.6	3404.19	7.17753	269.341	0.0591667	0.000481098
2.304	24214	3364.76	7.19171	269.176	0.0596052	0.000484643
2.328	23963.4	3327.19	7.20656	269.003	0.0600252	0.000488196
2.352	23698.5	3280.9	7.22237	268.819	0.0605741	0.000492382
2.376	23449.8	3239.71	7.2385	268.632	0.0610729	0.000496336
2.4	23172.8	3195	7.25509	268.439	0.0588761	0.00047841
2.424	22902.5	3153.09	7.27128	268.251	0.0593677	0.000482437
2.448	22622.4	3110.57	7.28892	268.047	0.0598781	0.000486689
2.472	22342.3	3059.17	7.30714	267.836	0.0605411	0.000491578
2.496	22065.8	3014.26	7.32446	267.636	0.0611166	0.000496125
2.52	21794	2966.13	7.3425	267.427	0.0617661	0.000500995
2.544	21520.8	2922.65	7.36093	267.215	0.0623549	0.000505708
2.568	21250.2	2875.39	7.37994	266.995	0.0630282	0.000510795
2.592	20973.5	2833.22	7.39916	266.774	0.0636248	0.000515691
2.616	20702.4	2792.43	7.41828	266.554	0.0642145	0.000520571
2.64	20430.3	2747.24	7.43695	266.34	0.0622466	0.000504364
2.664	20155.3	2703.4	7.45443	266.139	0.0628845	0.00050937
2.688	19882.9	2660.76	7.47212	265.936	0.0635198	0.00051441
2.712	19602.6	2619.2	7.48865	265.746	0.0641368	0.000519438
2.736	19332.8	2573	7.5055	265.553	0.0648729	0.000524909
2.76	19054.4	2531.88	7.52424	265.339	0.0655285	0.000530285
2.784	18794.8	2492.72	7.54272	265.128	0.0661772	0.00053554
2.808	18534.3	2452.24	7.56212	264.906	0.0668744	0.000541086
2.832	18281.3	2414.28	7.5812	264.689	0.0675406	0.000546501
2.856	18021.7	2375	7.60157	264.456	0.0682531	0.000552265
2.88	17775.6	2332.78	7.62226	264.221	0.0664619	0.000537311
2.904	17522.4	2293.56	7.64279	263.987	0.0671929	0.000543109
2.928	17269.5	2251.89	7.66414	263.745	0.0680064	0.000549323
2.952	17003.3	2213.22	7.68512	263.507	0.068754	0.000555453
2.976	16747	2172.59	7.70948	263.23	0.0696025	0.00056212
3	16503.2	2131.85	7.73319	262.962	0.0704907	0.00056887
3.024	16261.4	2097.81	7.75641	262.699	0.0712277	0.000575076
3.048	16022.9	2060.89	7.7787	262.447	0.0720604	0.000581643
3.072	15791.1	2027.37	7.79948	262.212	0.0728208	0.000587864
3.096	15559.3	1984.59	7.81958	261.985	0.0738634	0.0005952
3.12	15337.4	1954.07	7.83754	261.783	0.0719599	0.000580039
3.144	15103.7	1917.86	7.85449	261.592	0.0728104	0.000586521
3.168	14878.4	1886.9	7.87205	261.394	0.0735432	0.00059257
3.192	14654.2	1855.55	7.88904	261.203	0.0743042	0.000598756
3.216	14426.7	1825.31	7.90715	260.999	0.0750524	0.000605064
3.24	14205.7	1796.86	7.92218	260.83	0.0757498	0.000611015
3.264	13987.2	1764.34	7.938	260.653	0.0766096	0.000617677
3.288	13778.2	1734.24	7.95325	260.481	0.0774217	0.000624089
3.312	13564	1703.69	7.96856	260.31	0.0782641	0.000630757
3.336	13354.7	1671.79	7.98465	260.129	0.0791929	0.00063782
3.36	13161.7	1644.13	8.00124	259.943	0.0773969	0.000623263
3.384	12964.4	1615.9	8.01912	259.743	0.078242	0.000629992
3.408	12768.2	1587.48	8.03583	259.556	0.0791113	0.000636811
3.432	12574.8	1561.42	8.05074	259.389	0.0799042	0.00064327
3.456	12380.4	1533.26	8.06424	259.238	0.0807903	0.0006501
3.48	12191.4	1507.68	8.0746	259.123	0.0815811	0.000656376
3.504	12005.6	1481.71	8.08578	258.998	0.0824212	0.000662919
3.528	11823.6	1457.65	8.09586	258.885	0.0831995	0.000669175
3.552	11637.2	1435.13	8.10624	258.769	0.0839216	0.000675372
3.576	11455.4	1412.48	8.115	258.672	0.0846628	0.000681551
3.6	11288.8	1393.3	8.12316	258.58	0.0826598	0.000665921
3.624	11115.6	1367.52	8.13357	258.464	0.0835876	0.000672831
3.648	10950.1	1346.24	8.14489	258.338	0.0843482	0.000679102
3.672	10789.8	1322.73	8.15613	258.213	0.0852487	0.000685895
3.696	10623.6	1303.55	8.16727	258.089	0.0859405	0.000692047
3.72	10466.4	1281.97	8.1782	257.967	0.0867896	0.000698717
3.744	10306	1256.73	8.19149	257.819	0.0878694	0.000706566
3.768	10154.2	1234.24	8.20419	257.678	0.0888471	0.000713906
3.792	9999.33	1214.24	8.21546	257.552	0.0896927	0.000720776
3.816	9850	1196.64	8.22641	257.431	0.0904316	0.000727184
3.84	9718.6	1180.83	8.23849	257.296	0.0884922	0.000711998
3.864	9577.34	1161.11	8.25344	257.13	0.0894175	0.000719281
3.888	9435.37	1141.2	8.26934	256.953	0.0903859	0.00072689
3.912	9297.54	1125.91	8.28312	256.8	0.0910855	0.00073331
3.936	9160.57	1106.66	8.29719	256.644	0.0920557	0.000740865
3.96	9028	1089.97	8.31253	256.474	0.0929075	0.000748035
3.984	8899.6	1068.54	8.32922	256.289	0.0941214	0.000756704
4.008	8773.49	1047.51	8.34497	256.114	0.0953453	0.000765378
4.032	8647.26	1032.06	8.36049	255.942	0.0962086	0.000772714
4.056	8521.94	1015.74	8.3776	255.752	0.0971715	0.000780616
4.08	8415.76	1001.86	8.39592	255.55	0.0953594	0.000766302
4.104	8293.46	985.676	8.41533	255.335	0.0963616	0.000774506
4.128	8174	970.595	8.43462	255.121	0.0973123	0.000782524
4.152	8061.62	955.324	8.4523	254.926	0.0983078	0.000790512
4.176	7947.19	940.946	8.47353	254.691	0.0992843	0.000798829
4.2	7840.08	924.622	8.49632	254.439	0.100485	0.000808047
4.224	7728.95	909.676	8.51885	254.19	0.101585	0.000817057
4.248	7620.11	892.189	8.54408	253.911	0.102973	0.000827447
4.272	7510.78	876.405	8.57039	253.621	0.104261	0.000837651
4.296	7406.46	860	8.59875	253.308	0.105684	0.000848527
4.32	7311.05	846.128	8.62865	252.978	0.104181	0.000836485
4.344	7210.08	833.744	8.65875	252.647	0.105296	0.000846273
4.368	7109.95	818.026	8.68844	252.319	0.106764	0.000857523
4.392	7014.59	805.256	8.7133	252.046	0.107944	0.000867202
4.416	6918.36	790.615	8.73615	251.794	0.109323	0.000877637
4.44	6822.54	777.513	8.75685	251.566	0.110556	0.0008874
4.464	6735.15	764.462	8.77619	251.353	0.111836	0.000897051
4.488	6643.31	752.949	8.79557	251.14	0.112958	0.000906324
4.512	6548.1	742.897	8.81355	250.942	0.113906	0.000914999
4.536	6457.72	732.051	8.83016	250.76	0.114972	0.000923949
4.56	6373.56	721	8.84438	250.603	0.113219	0.00090971
4.584	6287.54	710.195	8.8575	250.459	0.11428	0.000918237
4.608	6197.73	699.439	8.87089	250.312	0.115345	0.000927036
4.632	6115.51	687.951	8.88583	250.147	0.116585	0.000936477
4.656	6026.46	677.61	8.90366	249.951	0.117711	0.00094609
4.68	5945.98	667.561	8.92068	249.764	0.118856	0.000955472
4.704	5863.54	657.415	8.93686	249.586	0.120021	0.000965029
4.728	5785.56	645.878	8.95625	249.373	0.121475	0.000975971
4.752	5706.95	635	8.97644	249.151	0.122883	0.000986939
4.776	5628.02	624.61	8.99356	248.963	0.124214	0.000997418
4.8	5561.02	617.302	9.01067	248.775	0.122231	0.00098231
4.824	5488.14	608.581	9.02711	248.594	0.123359	0.000991717
4.848	5416.95	597.465	9.04422	248.406	0.124906	0.00100289
4.872	5343.81	588.326	9.05941	248.239	0.126143	0.00101282
4.896	5268.7	580.395	9.07339	248.085	0.127182	0.00102202
4.92	5196.95	572.233	9.08509	247.957	0.128269	0.00103111
4.944	5127.67	564.233	9.09963	247.797	0.129408	0.00104068
4.968	5060.02	555.605	9.11476	247.631	0.130701	0.00105095
4.992	4990.63	546.93	9.12563	247.511	0.131959	0.00106082
5.016	4925.79	538.86	9.136	247.397	0.133159	0.00107025
5.04	4867.09	532.556	9.14674	247.279	0.131088	0.00105419
5.064	4799.42	523.467	9.15659	247.171	0.132475	0.00106454
5.088	4739.36	516.022	9.16659	247.061	0.133637	0.00107367
5.112	4676.36	509.067	9.17469	246.972	0.134679	0.00108235
5.136	4612.27	501.489	9.18075	246.905	0.135827	0.0010914
5.16	4552.36	495.044	9.18636	246.843	0.136792	0.00109948
5.184	4490.36	488.6	9.19219	246.779	0.137763	0.00110782
5.208	4432.38	481.889	9.19569	246.741	0.138804	0.00111602
5.232	4373.78	475.6	9.19687	246.728	0.139732	0.00112361
5.256	4320.4	470.044	9.19771	246.718	0.14055	0.00113046
5.28	4271.06	464.106	9.19743	246.722	0.138442	0.00111298
5.304	4215.28	458.021	9.19729	246.723	0.139358	0.00112032
5.328	4163.36	452.191	9.19802	246.715	0.14028	0.00112759
5.352	4107.53	446.596	9.20124	246.68	0.141172	0.00113536
5.376	4051.4	440.596	9.20765	246.609	0.142227	0.00114428
5.4	3998.66	434.915	9.21724	246.504	0.143308	0.00115352
5.424	3948.26	429.426	9.2237	246.433	0.144331	0.00116208
5.448	3900.47	424.043	9.23368	246.323	0.145428	0.00117125
5.472	3855.79	417.596	9.24546	246.193	0.146886	0.00118195
5.496	3805.91	410.702	9.2588	246.046	0.148477	0.00119387
5.52	3762.27	404.673	9.27243	245.896	0.146847	0.00118007
5.544	3714.06	400.49	9.28805	245.724	0.147794	0.00118961
5.568	3667.04	393.755	9.30493	245.539	0.149506	0.00120243
5.592	3622.24	387.959	9.32082	245.364	0.150997	0.00121416
5.616	3577.47	382.857	9.3336	245.223	0.152262	0.00122467
5.64	3534.98	378.265	9.34502	245.097	0.153398	0.00123439
5.664	3494.08	373.061	9.3561	244.975	0.154754	0.00124491
5.688	3452.41	368.061	9.36996	244.822	0.156119	0.00125599
5.712	3410.08	363.816	9.38123	244.698	0.157214	0.00126578
5.736	3371.53	359.673	9.39046	244.596	0.158298	0.001275
5.76	3333.59	354.922	9.39784	244.515	0.156414	0.00125933
5.784	3295.51	349.882	9.40751	244.409	0.157829	0.00126998
5.808	3252.06	345	9.41736	244.3	0.159164	0.00128092
5.832	3212.27	340.392	9.42621	244.202	0.160456	0.0012913
5.856	3171.59	336.039	9.43635	244.09	0.161698	0.00130184
5.88	3130.31	332.118	9.44768	243.965	0.162825	0.00131223
5.904	3091.04	327.039	9.45975	243.832	0.16444	0.00132462
5.928	3053.9	322.333	9.47517	243.662	0.16605	0.00133736
5.952	3014.92	318.118	9.48914	243.508	0.167451	0.00134934
5.976	2975.73	313.745	9.50507	243.332	0.168982	0.00136229
6	2944	309.943	9.5221	243.144	0.167194	0.00134819
6.024	2909.7	305.472	9.54083	242.937	0.168927	0.00136194
6.048	2877.83	300.132	9.55719	242.756	0.171049	0.00137678
6.072	2843.42	296.811	9.57269	242.585	0.172307	0.00138834
6.096	2809.85	292.321	9.59056	242.387	0.174164	0.00140274
6.12	2779.42	288.755	9.6094	242.178	0.175721	0.0014158
6.144	2745.85	285.094	9.62954	241.955	0.177334	0.0014298
6.168	2711.19	281.491	9.64902	241.739	0.178921	0.00144387
6.192	2678.36	277.698	9.66448	241.568	0.180564	0.00145744
6.216	2648.66	273.792	9.68352	241.357	0.182436	0.00147224
6.24	2621.53	270.491	9.70341	241.136	0.180732	0.00145887
6.264	2592.24	266.691	9.72465	240.9	0.182658	0.00147432
6.288	2561.51	263	9.74697	240.652	0.184576	0.00149027
6.312	2531.93	259.455	9.77305	240.362	0.186576	0.00150718
6.336	2503.22	255.709	9.80039	240.058	0.18878	0.00152521
6.36	2473.47	251.6	9.82484	239.786	0.191148	0.00154376
6.384	2445.07	248	9.84716	239.537	0.193256	0.00156083
6.408	2417.15	244.727	9.86891	239.294	0.195218	0.00157727
6.432	2388.53	240.818	9.89157	239.041	0.197618	0.00159598
6.456	2359.45	237.236	9.91421	238.788	0.199871	0.00161432
6.48	2335.02	234.842	9.93834	238.518	0.198	0.00160117
6.504	2308.4	232.298	9.9618	238.255	0.199728	0.00161726
6.528	2281.56	229.088	9.98292	238.018	0.201843	0.00163473
6.552	2255.19	225.772	10.0042	237.779	0.204093	0.00165289
6.576	2228.54	222.684	10.022	237.58	0.206129	0.00166968
6.6	2204.28	219.228	10.034	237.444	0.208344	0.0016858
6.624	2179.25	216	10.0467	237.302	0.210454	0.00170187
6.648	2153.21	213.368	10.0579	237.176	0.212114	0.00171606
6.672	2126	210.263	10.0662	237.082	0.214035	0.00173111
6.696	2103.11	207.947	10.0714	237.023	0.215404	0.00174247
6.72	2080.71	206.458	10.0777	236.953	0.212513	0.00172171
6.744	2056.61	203.983	10.0807	236.919	0.213914	0.00173305
6.768	2033.1	202.085	10.0802	236.925	0.214793	0.00174144
6.792	2009.47	199.932	10.0807	236.918	0.215916	0.00175119
6.816	1988.29	197.915	10.0784	236.945	0.216915	0.00175938
6.84	1966.85	195.186	10.0782	236.947	0.218571	0.00177091
6.864	1947.05	193.017	10.0833	236.889	0.220019	0.00178242
6.888	1925.07	190.915	10.0893	236.822	0.221405	0.0017944
6.912	1904.2	188.576	10.0978	236.726	0.223134	0.00180825
6.936	1881.9	186.593	10.1103	236.585	0.22468	0.00182263
6.96	1864.23	184.377	10.1269	236.397	0.222982	0.00180871
6.984	1842.52	181.803	10.1402	236.248	0.225132	0.00182581
7.008	1822.26	179.574	10.1551	236.079	0.227113	0.00184237
7.032	1800.82	177.344	10.1702	235.908	0.229106	0.00185946
7.056	1780.97	174.803	10.1844	235.747	0.23145	0.00187758
7.08	1762.56	172.311	10.1996	235.575	0.233885	0.00189611
7.104	1744.2	170.623	10.2157	235.392	0.235601	0.00191192
7.128	1724.13	168.18	10.2301	235.228	0.238001	0.00193083
7.152	1707.67	166.607	10.2429	235.083	0.2396	0.00194514
7.176	1688.13	164.639	10.2571	234.921	0.241593	0.00196242
7.2	1671.1	162.984	10.2735	234.735	0.23956	0.00194747
7.224	1653.9	160.762	10.2861	234.59	0.241889	0.00196531
7.248	1636.13	158.952	10.3	234.433	0.243836	0.00198211
7.272	1618.6	157.317	10.314	234.272	0.245637	0.00199842
7.296	1601.52	155.333	10.3301	234.088	0.247971	0.00201754
7.32	1585.6	152.921	10.3485	233.878	0.251	0.00204004
7.344	1568.7	151.302	10.3657	233.681	0.253059	0.00205856
7.368	1549.76	149.381	10.3821	233.492	0.255416	0.00207896
7.392	1534.97	147.508	10.3975	233.316	0.257875	0.00209838
7.416	1518	145.587	10.4167	233.094	0.260535	0.0021206
7.44	1504.51	143.892	10.4353	232.88	0.258983	0.00210789
7.464	1487.34	142.431	10.4503	232.707	0.260907	0.00212605
7.488	1471.2	140.538	10.4688	232.494	0.263645	0.00214852
7.512	1454.91	139.062	10.4852	232.305	0.265763	0.00216797
7.536	1438.6	137	10.5017	232.114	0.268751	0.00219141
7.56	1422.69	135.308	10.5194	231.909	0.271353	0.00221359
7.584	1407.98	133.662	10.5345	231.733	0.273865	0.00223437
7.608	1392.68	131.738	10.5502	231.551	0.276852	0.00225778
7.632	1377.43	130.508	10.5661	231.366	0.278852	0.00227717
7.656	1362.03	128.646	10.5831	231.167	0.281927	0.00230181
7.68	1349.4	127.045	10.5941	231.039	0.28019	0.00228641
7.704	1334.87	125.672	10.605	230.911	0.282285	0.00230475
7.728	1319.15	124.269	10.6138	230.808	0.284296	0.00232269
7.752	1305.79	122.687	10.6209	230.725	0.286665	0.0023408
7.776	1292.12	121.328	10.6275	230.648	0.288655	0.00235735
7.8	1278.51	120.373	10.6326	230.588	0.289903	0.00237031
7.824	1265.09	118.955	10.6361	230.547	0.291899	0.00238601
7.848	1251.58	117.731	10.6424	230.473	0.293731	0.00240207
7.872	1238.36	116.284	10.6519	230.362	0.296194	0.00242195
7.896	1225.57	115.328	10.6624	230.239	0.297861	0.00243864
7.92	1214.35	114.087	10.6756	230.084	0.295948	0.00242328
7.944	1201.48	112.71	10.6915	229.896	0.298754	0.00244702
7.968	1189.49	111.261	10.7061	229.725	0.301726	0.00247077
7.992	1177.78	109.87	10.7209	229.549	0.304679	0.0024946
8.016	1166.23	108.406	10.7316	229.423	0.307605	0.00251692
8.04	1153.97	106.899	10.7448	229.267	0.310794	0.00254181
8.064	1141.35	105.71	10.7618	229.065	0.313597	0.00256685
8.088	1130.67	104.739	10.7831	228.813	0.316362	0.00259249
8.112	1119.61	103.725	10.8043	228.56	0.319248	0.00261912
8.136	1108.68	102.971	10.8274	228.284	0.321736	0.00264495
8.16	1100.06	102.127	10.8533	227.975	0.320196	0.00263549
8.184	1089.45	100.577	10.8757	227.706	0.324545	0.00266942
8.208	1078.93	99.0423	10.9009	227.402	0.329185	0.00270606
8.232	1067.04	97.6761	10.9275	227.081	0.333557	0.00274331
8.256	1056.31	96.2535	10.957	226.725	0.338475	0.0027839
8.28	1046.86	94.8028	10.9888	226.337	0.34389	0.00282747
8.304	1035.55	93.7887	11.0229	225.921	0.348358	0.00286959
8.328	1024.62	92.5211	11.0549	225.529	0.353498	0.00291409
8.352	1014.65	91.507	11.0859	225.148	0.358077	0.00295563
8.376	1004.35	90.338	11.1171	224.761	0.36323	0.00300069
8.4	995.548	89.5479	11.148	224.377	0.362439	0.0029993
8.424	984.726	88.3425	11.1732	224.063	0.367324	0.00304136
8.448	974.479	87.137	11.1955	223.783	0.372139	0.00308175
8.472	964.603	85.863	11.2175	223.507	0.377294	0.00312364
8.496	955.658	84.8082	11.2372	223.259	0.381751	0.0031609
8.52	946.671	83.6712	11.2528	223.062	0.386186	0.00319623
8.544	936.534	82.7397	11.2693	222.853	0.390026	0.00323059
8.568	927.712	82.1918	11.2824	222.686	0.392416	0.00325582
8.592	918.466	81.1644	11.2919	222.565	0.396077	0.00328523
8.616	909.781	80.4795	11.2985	222.481	0.398355	0.00330647
8.64	901.96	79.8933	11.3005	222.455	0.394545	0.00327664
8.664	892.467	78.9867	11.3032	222.421	0.397149	0.00329788
8.688	882.533	78.16	11.3049	222.399	0.399364	0.00331732
8.712	873.507	77.3867	11.31	222.334	0.401864	0.00333944
8.736	864.733	76.48	11.3145	222.276	0.404865	0.0033634
8.76	856.293	75.84	11.3175	222.239	0.406764	0.00338129
8.784	847.733	74.7333	11.322	222.181	0.410656	0.00340935
8.808	839.293	74.0267	11.3294	222.086	0.413378	0.00343399
8.832	832	73.3467	11.3387	221.966	0.41637	0.00346014
8.856	823.8	72.48	11.3504	221.816	0.42034	0.00349325
8.88	816.545	72.026	11.3612	221.677	0.417141	0.00347173
8.904	809.052	71.3506	11.3744	221.506	0.420639	0.00350332
8.928	802.247	70.4935	11.3846	221.375	0.424694	0.003535
8.952	794.039	69.6883	11.3955	221.233	0.428535	0.00356785
8.976	786.364	68.8831	11.4027	221.139	0.432072	0.0035966
9	779.455	68.2208	11.4097	221.048	0.435097	0.0036223
9.024	772.169	67.5195	11.4192	220.924	0.438599	0.00365238
9.048	765.558	66.8312	11.426	220.835	0.441852	0.00367898
9.072	757.234	66.0909	11.4301	220.782	0.444854	0.00370463
9.096	750.208	65.6753	11.4363	220.701	0.446757	0.00372547
9.12	744.557	65.0633	11.4432	220.61	0.444186	0.0037034
9.144	738.152	64.519	11.4516	220.501	0.447101	0.00372984
9.168	729.342	63.8987	11.4574	220.424	0.449797	0.00375649
9.192	721.975	63.1899	11.4623	220.36	0.453044	0.00378348
9.216	714.987	62.3797	11.4668	220.3	0.456885	0.00381267
9.24	708.038	61.6076	11.4743	220.201	0.461002	0.0038454
9.264	700.367	60.8101	11.4801	220.125	0.465006	0.00387747
9.288	694.38	60.3797	11.4864	220.042	0.467385	0.00390066
9.312	687.456	59.7342	11.4941	219.94	0.471038	0.00393203
9.336	681.43	59.2152	11.4987	219.88	0.47373	0.00395569
9.36	675.975	58.7531	11.5014	219.844	0.470038	0.00392576
9.384	670.111	58.2346	11.5038	219.812	0.472476	0.00394649
9.408	664.63	57.7407	11.5047	219.8	0.47465	0.00396448
9.432	658.951	57.3086	11.5089	219.744	0.476933	0.00398595
9.456	652.84	56.8889	11.5164	219.644	0.479573	0.00401238
9.48	646.79	56.284	11.5248	219.532	0.483506	0.00404555
9.504	641.506	55.6914	11.5356	219.389	0.487898	0.00408182
9.528	635.136	55.0988	11.5508	219.185	0.492884	0.00412642
9.552	628.951	54.4691	11.5658	218.983	0.498205	0.00417251
9.576	623.358	53.7778	11.5837	218.742	0.504618	0.00422564
9.6	618.169	53.2892	11.6071	218.426	0.504594	0.00423052
9.624	612.675	52.7108	11.632	218.086	0.511679	0.00429386
9.648	607.518	52.0361	11.6542	217.783	0.519227	0.00435708
9.672	601.639	51.5301	11.6792	217.439	0.52617	0.00442227
9.696	595.747	50.9398	11.7037	217.099	0.533856	0.00449147
9.72	590.88	50.3614	11.7245	216.809	0.54117	0.00455442
9.744	585.47	49.759	11.7442	216.533	0.548554	0.00461825
9.768	580.181	49.3253	11.7599	216.312	0.554037	0.00466966
9.792	574.904	48.7108	11.7736	216.118	0.560704	0.00472499
9.816	569.205	48.1687	11.789	215.899	0.567201	0.0047827
9.84	564.859	47.7882	11.7996	215.748	0.564966	0.00476679
9.864	559.4	47.3412	11.8124	215.565	0.570329	0.00481661
9.888	554.271	46.9882	11.8216	215.433	0.574275	0.00485558
9.912	549.706	46.4824	11.8357	215.23	0.580817	0.00491152
9.936	543.894	45.9176	11.8447	215.1	0.586618	0.00496108
9.96	538.329	45.5765	11.8526	214.986	0.590274	0.00499912
9.984	532.918	44.8824	11.8554	214.945	0.596124	0.00504124
10.008	526.929	44.4	11.8588	214.896	0.600085	0.00507669
10.032	522.106	43.8118	11.8636	214.827	0.605747	0.00511952
10.056	517.659	43.4941	11.8675	214.769	0.608753	0.00514839
10.08	513.345	43.1264	11.8691	214.746	0.604672	0.00511423
10.104	509.333	42.977	11.8743	214.671	0.606429	0.005138
10.128	504.379	42.5517	11.8752	214.657	0.6097	0.00516577
10.152	499.943	42.1954	11.876	214.645	0.61242	0.00518981
10.176	495.529	41.7471	11.8739	214.677	0.615389	0.00521119
10.2	490.862	41.3793	11.8763	214.641	0.618639	0.0052406
10.224	486.195	40.9655	11.8774	214.625	0.622091	0.0052694
10.248	481.368	40.5057	11.8844	214.523	0.627549	0.00531598
10.272	476.989	40.1609	11.8889	214.457	0.631296	0.00535035
10.296	472.437	39.7241	11.8964	214.347	0.63687	0.00539805
10.32	468.427	39.2697	11.904	214.235	0.635673	0.00538565
10.344	464.427	38.9775	11.913	214.101	0.640291	0.00543006
10.368	460.258	38.5843	11.9246	213.93	0.646802	0.00548773
10.392	455.764	38.2921	11.9396	213.707	0.653085	0.00555069
10.416	451.225	37.8202	11.9537	213.495	0.661462	0.00562321
10.44	446.584	37.3596	11.9659	213.313	0.669304	0.0056913
10.464	442.461	36.9888	11.9755	213.168	0.675591	0.0057474
10.488	438.18	36.5281	11.9898	212.952	0.684537	0.00582424
10.512	433.888	36.0112	12.005	212.721	0.694785	0.00590966
10.536	430.067	35.7416	12.0215	212.468	0.702503	0.00598492
10.56	426.747	35.4835	12.0386	212.204	0.702786	0.00599574
10.584	422.659	35.1209	12.0518	212	0.710915	0.00606969
10.608	418.67	34.6813	12.0647	211.798	0.720322	0.00614985
10.632	414.846	34.2967	12.0795	211.567	0.729875	0.00623435
10.656	411.385	34.044	12.0918	211.373	0.736901	0.00630207
10.68	407.934	33.6593	12.1056	211.154	0.746706	0.00638666
10.704	403.769	33.3736	12.1226	210.884	0.756177	0.0064795
10.728	399.978	33.044	12.1438	210.543	0.768495	0.00659469
10.752	395.604	32.5385	12.1679	210.152	0.785243	0.00674162
10.776	392.022	32.1758	12.194	209.722	0.801537	0.00689106
10.8	388.86	31.914	12.229	209.139	0.81236	0.00700342
10.824	385.71	31.5806	12.2594	208.623	0.832165	0.0071866
10.848	382.011	31.1398	12.2904	208.088	0.855309	0.00739526
10.872	378.731	30.6989	12.3161	207.638	0.877079	0.00758667
10.896	375.097	30.2903	12.3349	207.305	0.894955	0.00774471
10.92	372.043	29.8387	12.3493	207.047	0.91202	0.00788555
10.944	368.409	29.5806	12.3656	206.751	0.92652	0.00802517
10.968	364.624	29.3118	12.3778	206.529	0.938845	0.00814368
10.992	360.968	29.1398	12.3817	206.459	0.94351	0.00819754
11.016	357.505	28.914	12.3833	206.428	0.947994	0.00824244
11.04	354.674	28.7368	12.3825	206.443	0.939971	0.0081767
11.064	351.147	28.4	12.3705	206.663	0.937542	0.00814235
11.088	347.937	28.1789	12.3612	206.831	0.934662	0.00811415
11.112	344.547	27.9895	12.3542	206.959	0.932544	0.0080984
11.136	341.779	27.6632	12.3516	207.005	0.937019	0.00812624
11.16	338.421	27.3474	12.3519	207	0.9429	0.00817337
11.184	334.768	27.1368	12.3554	206.938	0.948276	0.0082304
11.208	331.821	26.8632	12.3553	206.94	0.953276	0.00827041
11.232	328.695	26.5895	12.3524	206.991	0.956395	0.00829343
11.256	325.768	26.3579	12.3396	207.222	0.95194	0.0082461
11.28	323.34	26.1443	12.3221	207.534	0.934767	0.00808354
11.304	320.732	25.9072	12.3033	207.864	0.927553	0.00800588
11.328	317.495	25.6804	12.2864	208.159	0.92126	0.00794364
11.352	314.763	25.5567	12.2728	208.393	0.914881	0.00788907
11.376	311.99	25.6392	12.2549	208.7	0.901141	0.00778836
11.4	309.072	25.4124	12.237	209.004	0.895322	0.00772806
11.424	306.588	25.1959	12.2251	209.204	0.892939	0.00769895
11.448	303.515	24.9794	12.2087	209.479	0.888019	0.00764994
11.472	300.67	24.6392	12.1939	209.724	0.887408	0.00762551
11.496	297.722	24.4742	12.1866	209.844	0.886201	0.00761824
11.52	295.465	24.2929	12.1916	209.761	0.882911	0.00759335
11.544	292.323	23.8889	12.1902	209.784	0.890735	0.00764529
11.568	289.333	23.7172	12.1846	209.878	0.890571	0.00764777
11.592	286.414	23.4747	12.1803	209.948	0.89307	0.00766637
11.616	283.657	23.1818	12.1712	210.097	0.894702	0.00766802
11.64	281.263	23.0101	12.1673	210.161	0.89594	0.0076788
11.664	278.889	22.9596	12.1647	210.203	0.894526	0.00768016
11.688	276.475	22.8384	12.1518	210.414	0.89005	0.00764223
11.712	274.111	22.6465	12.1377	210.64	0.887158	0.00760954
11.736	271.758	22.4545	12.1204	210.918	0.882925	0.00756352
11.76	269.683	22.2475	12.1004	211.236	0.869574	0.00743421
11.784	267.307	22.0297	12.0808	211.546	0.86553	0.00738651
11.808	264.762	21.8911	12.066	211.778	0.86146	0.00735122
11.832	262.366	21.7822	12.0492	212.04	0.855938	0.00730445
11.856	259.475	21.604	12.0317	212.311	0.851907	0.00726732
11.88	257.099	21.396	12.0099	212.646	0.847555	0.00721776
11.904	255.01	21.2376	11.9796	213.106	0.839115	0.00713209
11.928	252.505	21.0693	11.9458	213.614	0.829844	0.00704075
11.952	249.97	20.9703	11.9138	214.09	0.819777	0.00695168
11.976	247.426	20.7723	11.8877	214.475	0.814774	0.00689847
12	245.32	20.6796	11.8635	214.827	0.800199	0.00677269
12.024	242.883	20.6019	11.8434	215.12	0.794385	0.00672762
12.048	240.835	20.4757	11.8216	215.434	0.7898	0.00668399
12.072	238.728	20.3301	11.7971	215.784	0.785081	0.00663676
12.096	236.398	20.1068	11.7829	215.986	0.785481	0.0066313
12.12	234.447	19.9612	11.7694	216.178	0.784277	0.00661741
12.144	232.34	19.699	11.7617	216.287	0.787952	0.0066362
12.168	230.214	19.5631	11.7623	216.278	0.790495	0.0066627
12.192	228.165	19.4757	11.7596	216.316	0.790773	0.00667337
12.216	226.369	19.2427	11.7602	216.307	0.796404	0.00671232
12.24	224.943	19.1238	11.7588	216.327	0.790804	0.00666475
12.264	223	18.9333	11.7564	216.362	0.794289	0.00669022
12.288	221.095	18.7429	11.7512	216.434	0.797093	0.00670831
12.312	219.343	18.6952	11.7492	216.463	0.796637	0.00671515
12.336	217.086	18.4762	11.7537	216.4	0.802871	0.00676657
12.36	215.371	18.3429	11.7483	216.475	0.804132	0.00677632
12.384	213.495	18.219	11.7387	216.611	0.803752	0.00677314
12.408	211.171	17.9905	11.7316	216.71	0.807098	0.00679458
12.432	209.514	17.8381	11.7183	216.896	0.806859	0.00678537
12.456	207.505	17.6381	11.7119	216.985	0.809899	0.00680461
12.48	205.991	17.5981	11.704	217.095	0.800172	0.00673032
12.504	203.925	17.4953	11.6953	217.215	0.799436	0.00672949
12.528	202.514	17.3084	11.6851	217.357	0.801564	0.00673481
12.552	200.766	17.2336	11.6715	217.544	0.798908	0.00671603
12.576	199.355	17.0935	11.6597	217.707	0.799182	0.0067109
12.6	197.607	16.9439	11.6458	217.899	0.798997	0.0067035
12.624	195.701	16.8037	11.638	218.005	0.800035	0.00671191
12.648	194.15	16.729	11.6355	218.039	0.800597	0.00672314
12.672	192.57	16.6168	11.6226	218.215	0.799689	0.00671321
12.696	190.832	16.4299	11.6118	218.362	0.801798	0.00672154
12.72	189.404	16.3119	11.6014	218.503	0.794563	0.00665721
12.744	187.936	16.1743	11.5868	218.701	0.794365	0.00664807
12.768	186.385	16.0275	11.577	218.833	0.795668	0.00665316
12.792	184.725	15.9817	11.5715	218.906	0.794453	0.00665378
12.816	183.33	15.8991	11.5635	219.014	0.794135	0.00665299
12.84	181.798	15.7431	11.5515	219.176	0.795326	0.00665489
12.864	180.339	15.6789	11.5442	219.273	0.794526	0.00665378
12.888	179	15.5138	11.539	219.344	0.797981	0.00667381
12.912	177.532	15.3761	11.533	219.423	0.800198	0.00668845
12.936	176.101	15.3119	11.5306	219.455	0.800639	0.00669961
12.96	174.919	15.2342	11.5312	219.447	0.795298	0.00665874
12.984	173.288	15.027	11.5325	219.429	0.801803	0.00670435
13.008	171.964	14.8739	11.5301	219.461	0.805764	0.0067309
13.032	170.532	14.7477	11.5268	219.506	0.808413	0.00675134
13.056	169.036	14.6577	11.5182	219.62	0.80835	0.00675313
13.08	167.667	14.5315	11.5091	219.741	0.809724	0.00675978
13.104	166.243	14.3784	11.5	219.862	0.812163	0.00677188
13.128	165	14.3784	11.4812	220.111	0.806395	0.00673246
13.152	163.613	14.2252	11.4606	220.382	0.806272	0.00671824
13.176	162.387	14.1802	11.4447	220.591	0.803126	0.00669509
13.2	161.124	14.1327	11.4281	220.809	0.792825	0.00661227
13.224	159.743	14.0354	11.4079	221.072	0.790784	0.00659101
13.248	158.142	13.9646	11.383	221.395	0.786501	0.00655645
13.272	156.991	13.8496	11.3626	221.659	0.785542	0.00653861
13.296	155.903	13.6903	11.3407	221.94	0.786225	0.00652619
13.32	154.779	13.6372	11.3279	222.105	0.784502	0.00651414
13.344	153.416	13.5575	11.3167	222.249	0.783985	0.00651199
13.368	152.239	13.4867	11.3156	222.263	0.785397	0.00652854
13.392	150.85	13.4071	11.3177	222.236	0.787621	0.00655477
13.416	149.584	13.2832	11.3158	222.26	0.79104	0.00658067
13.44	148.409	13.1217	11.3101	222.333	0.788486	0.00654798
13.464	147.2	13.0522	11.3102	222.332	0.790123	0.00656775
13.488	146.513	12.887	11.315	222.27	0.797544	0.00661387
13.512	145.348	12.8087	11.3158	222.26	0.799814	0.00663708
13.536	144.043	12.7304	11.3138	222.285	0.801363	0.00665542
13.56	142.896	12.6174	11.3084	222.355	0.803952	0.00667284
13.584	141.835	12.4957	11.3004	222.456	0.806565	0.00668659
13.608	140.583	12.3652	11.2951	222.524	0.809958	0.00670912
13.632	139.583	12.3565	11.2817	222.695	0.806334	0.00668798
13.656	138.565	12.3391	11.2717	222.823	0.803813	0.00667614
13.68	137.863	12.3077	11.2684	222.864	0.796842	0.00662251
13.704	136.88	12.1966	11.2636	222.925	0.7998	0.0066411
13.728	135.684	12.094	11.2569	223.01	0.801752	0.00665549
13.752	134.658	12	11.253	223.059	0.804132	0.00667331
13.776	133.598	11.8889	11.2503	223.093	0.807574	0.00669778
13.8	132.846	11.7778	11.2556	223.026	0.813107	0.00673743
13.824	131.701	11.6838	11.2673	222.878	0.818694	0.00678966
13.848	130.598	11.5812	11.2834	222.674	0.825796	0.00685393
13.872	129.53	11.4359	11.3062	222.382	0.836764	0.00694407
13.896	128.462	11.4017	11.3279	222.105	0.84187	0.00700723
13.92	127.58	11.3025	11.3519	221.797	0.844149	0.00703172
13.944	126.437	11.1597	11.3716	221.542	0.854773	0.00711976
13.968	125.496	11.0084	11.3923	221.275	0.866645	0.00721287
13.992	124.538	10.8571	11.4122	221.016	0.878642	0.00730665
14.016	123.647	10.7899	11.4282	220.807	0.88517	0.00737019
14.04	122.84	10.6807	11.4504	220.517	0.896018	0.00746159
14.064	121.924	10.605	11.4719	220.233	0.904757	0.00754498
14.088	120.983	10.521	11.4914	219.976	0.9136	0.00762712
14.112	120.076	10.4454	11.5031	219.821	0.920032	0.00768702
14.136	119.084	10.3529	11.508	219.756	0.925588	0.00773423
14.16	118.157	10.2645	11.5056	219.788	0.921336	0.00769566
14.184	117.248	10.1736	11.5031	219.821	0.924985	0.00772206
14.208	116.298	10.0744	11.5032	219.82	0.929885	0.00775888
14.232	115.289	10	11.5045	219.802	0.933452	0.00779253
14.256	114.289	9.91736	11.5107	219.72	0.938984	0.00784268
14.28	113.289	9.90909	11.5205	219.59	0.940565	0.00788077
14.304	112.273	9.78512	11.5229	219.558	0.947911	0.00793431
14.328	111.372	9.68595	11.5244	219.537	0.953614	0.00797729
14.352	110.57	9.60331	11.5232	219.554	0.957609	0.00800661
14.376	109.711	9.4876	11.531	219.45	0.966584	0.00807424
14.4	109.114	9.39837	11.5318	219.439	0.964281	0.00804508
14.424	108.252	9.38211	11.54	219.33	0.966264	0.00808173
14.448	107.439	9.30894	11.5357	219.387	0.96886	0.00810058
14.472	106.675	9.25203	11.5301	219.462	0.969977	0.00810979
14.496	105.951	9.12195	11.5216	219.575	0.975843	0.00813533
14.52	105.114	9.11382	11.5136	219.682	0.972506	0.00812196
14.544	104.358	9.05691	11.4933	219.951	0.969492	0.00808939
14.568	103.309	9.04065	11.4772	220.163	0.964118	0.00805841
14.592	102.65	8.97561	11.4603	220.387	0.963008	0.00803881
14.616	101.943	8.92683	11.4501	220.52	0.962524	0.00803373
14.64	101.352	8.832	11.4291	220.795	0.955136	0.00794958
14.664	100.568	8.832	11.4117	221.022	0.948921	0.00790963
14.688	99.8	8.784	11.3952	221.237	0.946713	0.00788927
14.712	99.104	8.728	11.3896	221.309	0.948153	0.00790022
14.736	98.472	8.624	11.381	221.421	0.952711	0.00791979
14.76	97.624	8.576	11.3755	221.492	0.953321	0.0079302
14.784	96.816	8.536	11.3583	221.715	0.950361	0.007907
14.808	95.992	8.464	11.3412	221.935	0.949997	0.00789634
14.832	95.288	8.384	11.33	222.078	0.952119	0.00790338
14.856	94.544	8.336	11.3189	222.221	0.951613	0.00789948
14.88	93.8268	8.25984	11.2961	222.511	0.943111	0.00781472
14.904	93.1339	8.25197	11.2784	222.737	0.937962	0.00778055
14.928	92.3228	8.24409	11.2643	222.916	0.933474	0.00775686
14.952	91.7717	8.16535	11.2507	223.088	0.935442	0.00775803
14.976	91.1811	8.11811	11.2383	223.244	0.935102	0.00775143
15	90.315	8.08661	11.2294	223.357	0.933695	0.00775022
15.024	89.685	8.01575	11.2144	223.547	0.934669	0.00774715
15.048	89.0551	7.96063	11.2079	223.627	0.936375	0.00775887
15.072	88.2992	7.88976	11.211	223.59	0.941356	0.00780039
15.096	87.5354	7.79528	11.2124	223.571	0.948069	0.00784802
	87.0698	7.74419	11.2201
	86.2558	7.70543	11.2316
	85.5504	7.62791	11.2423
	84.8915	7.55814	11.2623
	84.3721	7.49612	11.2776
	83.7752	7.4031	11.2933
	83.2636	7.37209	11.3069
	82.5659	7.30233	11.3292
	81.969	7.18605	11.3499
	81.3721	7.16279	11.373
	80.855	7.0916	11.3994
	80.0992	7.03053	11.418
	79.374	6.93893	11.4391
	78.7939	6.8855	11.4569
	78.2137	6.80916	11.4638
	77.7328	6.73282	11.4752
	77.1298	6.69466	11.4788
	76.5496	6.64122	11.4825
	76.0382	6.61069	11.479
	75.5573	6.58015	11.4796
	75.218	6.54887	11.4739
	74.7594	6.53383	11.4625
	74.0977	6.4812	11.4565
	73.5489	6.45113	11.4431
	73.0902	6.38346	11.4326
	72.5789	6.35338	11.4243
	72.0451	6.30827	11.4148
	71.6541	6.25564	11.4077
	71.0977	6.24812	11.4075
	70.5489	6.19549	11.4102
	70.037	6.14815	11.411
	69.4667	6.1037	11.4129
	68.9407	6.06667	11.4196
	68.4963	5.99259	11.4206
	68.0741	5.95556	11.4194
	67.6519	5.9037	11.4156
	67.1407	5.86667	11.4194
	66.7556	5.80741	11.4212
	66.1556	5.77037	11.4194
	65.5852	5.77037	11.4168
	65.0073	5.72993	11.4144
	64.5109	5.64234	11.4062
	63.9124	5.60584	11.4009
	63.4307	5.59124	11.3908
	63	5.52555	11.3805
	62.5912	5.48905	11.3756
	62.1606	5.46715	11.3677
	61.8321	5.43066	11.3485
	61.3212	5.38686	11.3378
	60.8175	5.35766	11.3247
	60.5468	5.35252	11.3065
	60.0216	5.33094	11.2874
	59.5827	5.30935	11.2688
	59.1727	5.2446	11.2557
	58.9065	5.25899	11.2381
	58.5036	5.22302	11.227
	58.3022	5.20863	11.2189
	57.9928	5.19424	11.2256
	57.5036	5.11511	11.2366
	56.9137	5.08633	11.2378
	56.5461	5.03546	11.2467
	56.1915	5.00709	11.2681
	55.7801	4.92199	11.295
	55.5106	4.89362	11.319
	55.1986	4.88652	11.3461
	54.9716	4.86525	11.3771
	54.6667	4.78014	11.4042
	54.1064	4.70922	11.4348
	53.6596	4.69504	11.4575
	53.1986	4.60993	11.4825
	52.8951	4.58741	11.5067
	52.4755	4.55245	11.527
	52.1399	4.51049	11.5304
	51.7552	4.46853	11.5213
	51.3497	4.41958	11.5269
	50.9371	4.40559	11.5256
	50.6014	4.39161	11.5251
	50.3077	4.38462	11.5248
	49.9371	4.38462	11.5199
	49.5804	4.31469	11.5095
