# Supplementary material for: Tropospheric temperature retrievals using nonlinear calibration functions in the pure rotational Raman lidar technique
Source: Copernicus journal article supplement (doi:10.5194/amt-2016-189), 2016-06-13
Supplement: Supplementary file 13 [file 02.10.2014. Calculation of calibration coefficients A0 and B0.xlsx]

## Sheet: Лист1
				0.00423089		2.23361	1.80211e-05	0.00949816	1.79004e-05
									Det	DetA	DetB
									1.20641e-07	6.64729e-08	4.79787e-05
700	3.05	-7	266.15	0.00375728	3.048	2.01156	1.41172e-05	0.007558
500	5.61	-22.5	250.65	0.00398963	5.616	2.1598	1.59171e-05	0.0086168
400	7.21	-35	238.15	0.00419903	7.2	2.25258	1.76319e-05	0.00945868		A0	B0
300	9.14	-49	224.15	0.0044613	9.144	2.32261	1.99032e-05	0.0103618		DetA/Det	DetB/Det
200	12	-62.5	210.65	0.00474721	12	2.42152	2.2536e-05	0.0114955
										0.550998	397.698
