# Supplementary material for: Tropospheric temperature retrievals using nonlinear calibration functions in the pure rotational Raman lidar technique
Source: Copernicus journal article supplement (doi:10.5194/amt-2016-189), 2016-06-13
Supplement: Supplementary file 14 [file 02.10.2014. Calculation of calibration coefficients A1, B1, and C1.xlsx]

## Sheet: Лист1
				0.00423089		2.23361	1.80211e-05	7.72719e-08	3.33508e-10	0.00949816	4.06583e-05	1.79004e-05	3.24759e-10	5.85251e-15	5.97095e-15
												Det	DetA	DetB	DetC
												1.28771e-21	-4.07601e-21	2.77644e-18	-2.66053e-16
700	3.05	-7	266.15	0.00375728	3.048	2.01156	1.41172e-05	5.30421e-08	1.99294e-10	0.007558	2.83975e-05
500	5.61	-22.5	250.65	0.00398963	5.616	2.1598	1.59171e-05	6.35034e-08	2.53355e-10	0.0086168	3.43778e-05
400	7.21	-35	238.15	0.00419903	7.2	2.25258	1.76319e-05	7.40369e-08	3.10883e-10	0.00945868	3.97173e-05		A1	B1	C1
300	9.14	-49	224.15	0.0044613	9.144	2.32261	1.99032e-05	8.8794e-08	3.96137e-10	0.0103618	4.62273e-05		DetA/Det	DetB/Det	DetC/Det
200	12	-62.5	210.65	0.00474721	12	2.42152	2.2536e-05	1.06983e-07	5.07872e-10	0.0114955	5.45713e-05
													-3.16533	2156.11	-206610
