# Supplementary material for: Tropospheric temperature retrievals using nonlinear calibration functions in the pure rotational Raman lidar technique
Source: Copernicus journal article supplement (doi:10.5194/amt-2016-189), 2016-06-13
Supplement: Supplementary file 15 [file 02.10.2014. Calculation of calibration coefficients A2, B2, and C2.xlsx]

## Sheet: Лист1
				0.00423089		2.23361	1.80211e-05	237.95	56998.7	0.00949816	528.778	1.79004e-05	56620.2
												Det	DetA	DetB	DetC
												-2.26343e-07	-1.8457e-06	0.000112695	3.62822e-09
700	3.05	-7	266.15	0.00375728	3.048	2.01156	1.41172e-05	266.15	70835.8	0.007558	535.377
500	5.61	-22.5	250.65	0.00398963	5.616	2.1598	1.59171e-05	250.65	62825.4	0.0086168	541.354
400	7.21	-35	238.15	0.00419903	7.2	2.25258	1.76319e-05	238.15	56715.4	0.00945868	536.453		A2	B2	C2
300	9.14	-49	224.15	0.0044613	9.144	2.32261	1.99032e-05	224.15	50243.2	0.0103618	520.613		DetA/Det	DetB/Det	DetC/Det
200	12	-62.5	210.65	0.00474721	12	2.42152	2.2536e-05	210.65	44373.4	0.0114955	510.093
													8.15441	-497.892	-0.0160297
