# Supplementary material for: Tropospheric temperature retrievals using nonlinear calibration functions in the pure rotational Raman lidar technique
Source: Copernicus journal article supplement (doi:10.5194/amt-2016-189), 2016-06-13
Supplement: Supplementary file 16 [file 02.10.2014. Calculation of calibration coefficients A3, B3, and C3.xlsx]

## Sheet: Лист1
				2.23361		0.00423089	5.0087	11.2746	25.4728	0.00949816	0.0214047	4.98903	25.0871	125.654	127.116
												Det	DetA1	DetB1	DetC1
												6.58109e-06	9.07357e-08	-7.35485e-08	2.02422e-08
700	3.05	-7	266.15	2.01156	3.048	0.00375728	4.04638	8.13955	16.3732	0.007558	0.0152034
500	5.61	-22.5	250.65	2.1598	5.616	0.00398963	4.66474	10.0749	21.7598	0.0086168	0.0186106
400	7.21	-35	238.15	2.25258	7.2	0.00419903	5.07413	11.4299	25.7468	0.00945868	0.0213065		A3 = a/c	B3 = b/c	C3 = 1/c
300	9.14	-49	224.15	2.32261	9.144	0.0044613	5.39451	12.5293	29.1007	0.0103618	0.0240665		DetA1/DetC1	DetB1/DetC1	Det/DetC1
200	12	-62.5	210.65	2.42152	12	0.00474721	5.86375	14.1992	34.3835	0.0114955	0.0278364
													4.48251	-3.63343	325.117
