# Supplementary material for: Tropospheric temperature retrievals using nonlinear calibration functions in the pure rotational Raman lidar technique
Source: Copernicus journal article supplement (doi:10.5194/amt-2016-189), 2016-06-13
Supplement: Supplementary file 17 [file 02.10.2014. Calculation of calibration coefficients A4, B4, and C4.xlsx]

## Sheet: Лист1
				2.23361		0.00423089	5.0087	0.449516	0.2029	0.00949816	0.00189208	4.98903	0.202065
												Det	DetA	DetB	DetC
												-5.61479e-08	1.78255e-09	-5.24887e-10	-1.88583e-09
700	3.05	-7	266.15	2.01156	3.048	0.00375728	4.04638	0.497126	0.247134	0.007558	0.00186784
500	5.61	-22.5	250.65	2.1598	5.616	0.00398963	4.66474	0.463006	0.214374	0.0086168	0.00184722
400	7.21	-35	238.15	2.25258	7.2	0.00419903	5.07413	0.443935	0.197078	0.00945868	0.0018641		A4	B4	C4
300	9.14	-49	224.15	2.32261	9.144	0.0044613	5.39451	0.430551	0.185374	0.0103618	0.00192081		DetA/Det	DetB/Det	DetC/Det
200	12	-62.5	210.65	2.42152	12	0.00474721	5.86375	0.412964	0.170539	0.0114955	0.00196043
													-0.0317474	0.00934829	0.0335868
