# Supplementary material for: Tropospheric temperature retrievals using nonlinear calibration functions in the pure rotational Raman lidar technique
Source: Copernicus journal article supplement (doi:10.5194/amt-2016-189), 2016-06-13
Supplement: Supplementary file 18 [file 02.10.2014. Raw lidar and smoothed signals, and their ratios.xlsx]

## Sheet: Лист1
Altitude
z, km		Raw lidar signals	Raw signals ratio	Smoothed signals	Smoothed signals	Smoothed signals ratio
0.048	465	57	8.15789	573	65.5	8.74809	8.59143	2.15077
0.072	681	74	9.2027	743	82	9.06098	8.45197	2.1344
0.096	1083	115	9.41739	995.333	113	8.80826	8.38058	2.12592
0.12	1222	150	8.14667	1177.67	135	8.72346	8.307	2.1171
0.144	1228	140	8.77143	1215.67	150.333	8.08647	8.2572	2.11109
0.168	1197	161	7.43478	1204.67	148.333	8.12135	8.21704	2.10621
0.192	1189	144	8.25694	1167.67	153.333	7.61522	8.11769	2.09405
0.216	1117	155	7.20645	1124.33	142.667	7.88084	8.00646	2.08025
0.24	1067	129	8.27132	1085.2	140.6	7.71835	7.94315	2.07231
0.264	1042	136	7.66176	1046.4	134	7.80896	7.84723	2.06016
0.288	1011	139	7.27338	1008.2	129	7.8155	7.81317	2.05581
0.312	995	111	8.96396	976.8	127.6	7.65517	7.78997	2.05284
0.336	926	130	7.12308	954.6	121.8	7.83744	7.79515	2.0535
0.36	910	122	7.45902	928	114.4	8.11189	7.78307	2.05195
0.384	931	107	8.70093	901.8	117.6	7.66837	7.76429	2.04954
0.408	878	102	8.60784	888.4	115.2	7.71181	7.73749	2.04608
0.432	864	127	6.80315	870	110.6	7.86618	7.70801	2.04226
0.456	859	118	7.27966	842.4	109.8	7.67213	7.69118	2.04007
0.48	818	99	8.26263	834.571	107.714	7.74801	7.66519	2.03669
0.504	793	103	7.69903	819.857	109.143	7.51178	7.60088	2.02826
0.528	809	94	8.60638	801.857	106.714	7.51406	7.59068	2.02692
0.552	821	111	7.3964	793	105.857	7.49123	7.59838	2.02793
0.576	775	112	6.91964	785.429	105.143	7.47011	7.5932	2.02725
0.6	738	110	6.70909	784.286	103.857	7.55158	7.61335	2.0299
0.624	797	112	7.11607	774.286	104.571	7.40437	7.61857	2.03059
0.648	765	94	8.1383	768.571	101.714	7.55618	7.63633	2.03292
0.672	785	94	8.35106	771.857	99	7.79654	7.64876	2.03454
0.696	739	99	7.46465	777.571	99.5714	7.80918	7.66158	2.03622
0.72	781	91	8.58242	768.333	97.3333	7.89384	7.6564	2.03554
0.744	798	93	8.58065	771	98.7778	7.8054	7.63705	2.03301
0.768	778	114	6.82456	775	100.556	7.70718	7.63752	2.03307
0.792	743	78	9.52564	781.222	102.111	7.65071	7.62574	2.03153
0.816	729	101	7.21782	798	104.556	7.63231	7.60098	2.02828
0.84	821	125	6.568	819.556	110.556	7.41307	7.59542	2.02755
0.864	801	110	7.28182	852.111	116.111	7.33876	7.58929	2.02674
0.888	841	108	7.78704	892.444	120.444	7.40959	7.60136	2.02833
0.912	890	121	7.35537	955.556	128.667	7.4266	7.6145	2.03005
0.936	975	145	6.72414	1040	138.222	7.52412	7.64123	2.03356
0.96	1091	143	7.62937	1185.45	153	7.74807	7.67286	2.03769
0.984	1141	153	7.45752	1307.73	167.091	7.82644	7.72722	2.04475
1.008	1311	152	8.625	1458.45	183.727	7.93815	7.80198	2.05438
1.032	1489	187	7.96257	1631.73	207.818	7.85171	7.87218	2.06333
1.056	1666	201	8.28856	1817.18	228.727	7.94475	7.94085	2.07202
1.08	2014	238	8.46218	2019.73	253.091	7.98024	7.99554	2.07888
1.104	2166	280	7.73571	2254	281.364	8.01099	8.02276	2.08228
1.128	2459	293	8.39249	2522.55	309.091	8.16118	8.04175	2.08465
1.152	2747	373	7.36461	2812.27	343.727	8.1817	8.04945	2.0856
1.176	2930	351	8.34758	3118.09	381.091	8.18201	8.06217	2.08718
1.2	3203	413	7.75545	3465.31	426.462	8.12572	8.06852	2.08797
1.224	3668	454	8.0793	3794.08	471.462	8.04748	8.06644	2.08771
1.248	4095	458	8.94105	4127.69	513.692	8.03534	8.06082	2.08702
1.272	4498	533	8.43902	4477.38	558.077	8.02288	8.03633	2.08397
1.296	4853	598	8.11538	4813.38	602.308	7.99157	8.00463	2.08002
1.32	5184	653	7.93874	5162.62	644.154	8.01457	7.97032	2.07572
1.344	5566	699	7.9628	5532.23	695.231	7.9574	7.93733	2.07158
1.368	5940	786	7.55725	5917.23	744.385	7.94916	7.90261	2.06719
1.392	6351	787	8.06989	6292.23	797.308	7.89185	7.8627	2.06213
1.416	6712	857	7.83197	6655.62	849.692	7.83297	7.81939	2.05661
1.44	6827	868	7.86521	6988.73	895.467	7.80457	7.77674	2.05114
1.464	7287	917	7.94656	7337.4	945.2	7.7628	7.72794	2.04484
1.488	7735	1015	7.62069	7669.73	1000.53	7.66564	7.67931	2.03853
1.512	8208	1052	7.80228	8015.13	1055.13	7.59632	7.62836	2.03187
1.536	8543	1142	7.48074	8346.33	1106	7.54641	7.57969	2.02547
1.56	8819	1139	7.74276	8686.87	1154.8	7.5224	7.5365	2.01976
1.584	9042	1211	7.46656	9007.73	1204.6	7.47778	7.49374	2.01407
1.608	9266	1175	7.88596	9319.67	1255.6	7.42248	7.45458	2.00883
1.632	9728	1279	7.60594	9642.33	1305	7.38876	7.42306	2.00459
1.656	9838	1428	6.88936	9957.27	1353.53	7.3565	7.39608	2.00095
1.68	10365	1472	7.04144	10249.9	1393.06	7.35787	7.3723	1.99773
1.704	10534	1462	7.2052	10534.1	1436.29	7.33419	7.34898	1.99456
1.728	11048	1518	7.278	10808.7	1474.18	7.33203	7.32743	1.99163
1.752	11164	1534	7.27771	11076.6	1513.41	7.31895	7.31191	1.98951
1.776	11391	1622	7.02281	11340.5	1553.59	7.29953	7.29939	1.98779
1.8	11667	1609	7.25109	11591.8	1591.24	7.2848	7.28651	1.98602
1.824	12011	1645	7.30152	11843.9	1630.06	7.26592	7.27253	1.9841
1.848	12338	1658	7.4415	12066.1	1666.41	7.24074	7.26044	1.98244
1.872	12552	1721	7.29343	12279.4	1693.29	7.25175	7.24654	1.98052
1.896	12565	1750	7.18	12463.6	1718.88	7.25098	7.23295	1.97865
1.92	12877	1696	7.59257	12597.4	1746.05	7.2148	7.22249	1.9772
1.944	13097	1809	7.23991	12763.7	1771.74	7.20408	7.21348	1.97595
1.968	13305	1822	7.30241	12898.6	1791.16	7.20128	7.20491	1.97476
1.992	13315	1851	7.19341	13030.4	1815.05	7.17909	7.19718	1.97369
2.016	13551	1835	7.38474	13146.2	1833.63	7.16947	7.18733	1.97232
2.04	13505	1897	7.11914	13264.1	1846.21	7.1845	7.17884	1.97114
2.064	13464	1885	7.14271	13352.4	1858.21	7.18561	7.17255	1.97026
2.088	13497	1907	7.07761	13425.9	1872.05	7.17175	7.16648	1.96941
2.112	13715	1964	6.9832	13469.7	1882.37	7.15571	7.15994	1.9685
2.136	13755	1990	6.91206	13524.2	1893.26	7.14333	7.15648	1.96802
2.16	13694	1950	7.02256	13515.3	1888.24	7.15762	7.1538	1.96764
2.184	13611	1887	7.21304	13544.4	1895.48	7.14566	7.15064	1.9672
2.208	13668	1988	6.87525	13546.8	1898.05	7.13723	7.14904	1.96698
2.232	13590	1975	6.88101	13537.6	1898.86	7.12935	7.14829	1.96687
2.256	13908	1848	7.52597	13535	1895.38	7.14102	7.15136	1.9673
2.28	13688	1873	7.30806	13516.4	1893.05	7.14001	7.15745	1.96815
2.304	13735	1921	7.14992	13486.1	1886.24	7.14976	7.16354	1.969
2.328	13384	1917	6.98174	13454.2	1877	7.16795	7.17178	1.97015
2.352	13601	1957	6.94992	13417	1872.95	7.16353	7.1809	1.97142
2.376	13362	1820	7.34176	13357.1	1857.86	7.18952	7.19185	1.97295
2.4	13499	1861	7.25363	13271.4	1840.61	7.21033	7.20453	1.97471
2.424	13489	1848	7.29924	13195.2	1826.43	7.22458	7.21535	1.97621
2.448	13147	1863	7.0569	13115.4	1812.43	7.23634	7.22483	1.97752
2.472	13112	1839	7.12996	13040.4	1801.78	7.23752	7.2336	1.97874
2.496	13259	1778	7.45726	12946.2	1785.74	7.24976	7.24314	1.98006
2.52	13161	1786	7.36898	12865	1767.04	7.2805	7.25056	1.98108
2.544	12870	1754	7.33751	12755.1	1757.13	7.25907	7.25733	1.98201
2.568	12794	1691	7.56594	12648.6	1743.65	7.25406	7.26287	1.98277
2.592	12714	1822	6.97805	12533.1	1725.26	7.26446	7.26809	1.98349
2.616	12458	1647	7.56406	12423.7	1709.26	7.26844	7.27497	1.98444
2.64	12430	1628	7.63514	12276	1688.32	7.27111	7.2824	1.98546
2.664	12313	1691	7.28149	12140.9	1666.6	7.28482	7.28902	1.98637
2.688	12003	1664	7.21334	12015.2	1649.2	7.28547	7.29726	1.9875
2.712	11858	1628	7.28378	11874.9	1628.08	7.29379	7.3064	1.98875
2.736	11887	1642	7.23934	11733.8	1604.48	7.31315	7.31615	1.99008
2.76	11500	1619	7.10315	11600.5	1582.28	7.3315	7.32757	1.99164
2.784	11722	1545	7.58706	11458	1558.2	7.35333	7.33837	1.99312
2.808	11382	1620	7.02593	11312.2	1539.12	7.34976	7.3513	1.99488
2.832	11237	1563	7.18938	11159	1517.28	7.35461	7.36373	1.99657
2.856	11079	1498	7.39586	11014.4	1494.16	7.37166	7.37587	1.99821
2.88	10867	1549	7.01549	10872.8	1470.48	7.39405	7.3875	1.99979
2.904	10560	1478	7.14479	10724.4	1451.22	7.38991	7.39907	2.00135
2.928	10595	1417	7.47706	10578.1	1424.26	7.42707	7.40919	2.00272
2.952	10224	1414	7.23055	10440.3	1406.63	7.42218	7.42082	2.00429
2.976	10220	1385	7.37906	10296.6	1386.3	7.42738	7.43357	2.00601
3	9991	1333	7.49512	10153	1364.44	7.4411	7.44676	2.00778
3.024	9962	1258	7.91892	10016.4	1342.93	7.45867	7.45958	2.0095
3.048	9814	1308	7.50306	9875.26	1322.93	7.46471	7.47499	2.01156
3.072	9549	1237	7.71948	9736.26	1302.04	7.47771	7.48991	2.01356
3.096	9614	1301	7.3897	9599.19	1280.78	7.49481	7.50701	2.01584
3.12	9332	1240	7.52581	9481.24	1261.34	7.51677	7.52657	2.01844
3.144	9256	1176	7.87075	9340.55	1239.62	7.53501	7.54798	2.02128
3.168	9206	1160	7.93621	9204.55	1217.62	7.55946	7.56911	2.02408
3.192	8999	1189	7.56854	9076.72	1195.69	7.5912	7.59172	2.02706
3.216	8787	1171	7.50384	8948.07	1175.79	7.61024	7.61521	2.03015
3.24	8763	1094	8.01005	8828.24	1155.14	7.64259	7.63886	2.03325
3.264	8737	1171	7.46114	8710.79	1134.72	7.67657	7.66236	2.03632
3.288	8550	1079	7.924	8587.03	1116.48	7.69115	7.68479	2.03924
3.312	8436	1101	7.66213	8472.28	1098.38	7.71343	7.70588	2.04198
3.336	8317	1083	7.67959	8351.72	1079.59	7.73604	7.72287	2.04419
3.36	8046	1088	7.39522	8244.1	1063.06	7.75503	7.73931	2.04631
3.384	8134	1078	7.54545	8131.87	1045.87	7.77521	7.75387	2.04819
3.408	7799	1045	7.46316	8021	1030.74	7.78177	7.76579	2.04973
3.432	7995	1026	7.7924	7913.13	1015.61	7.79148	7.77521	2.05094
3.456	7783	972	8.0072	7807.42	1003.77	7.77806	7.78347	2.052
3.48	7642	915	8.35191	7694.32	987.581	7.79108	7.79114	2.05299
3.504	7438	982	7.57434	7588.29	972.516	7.80274	7.79805	2.05387
3.528	7530	927	8.12298	7481.48	958.226	7.80764	7.80264	2.05446
3.552	7348	921	7.97828	7372.9	945.871	7.79483	7.80927	2.05531
3.576	7392	950	7.78105	7267.29	931.194	7.80427	7.81525	2.05608
3.6	7154	886	8.07449	7176.76	917.697	7.8204	7.82452	2.05726
3.624	7006	888	7.88964	7082.39	904.394	7.83109	7.83501	2.0586
3.648	6896	889	7.75703	6981.64	892.152	7.82562	7.84654	2.06007
3.672	6724	840	8.00476	6884.58	876.485	7.85476	7.85821	2.06156
3.696	6783	846	8.01773	6788.21	863.939	7.85728	7.87311	2.06345
3.72	6584	801	8.21973	6694.94	849.606	7.88005	7.88771	2.06531
3.744	6512	800	8.14	6602.36	835.061	7.90645	7.9002	2.06689
3.768	6525	789	8.26996	6515.45	821.667	7.92956	7.91245	2.06844
3.792	6470	839	7.71156	6420.21	809	7.93599	7.92397	2.06989
3.816	6272	870	7.2092	6333.27	795.758	7.9588	7.93295	2.07102
3.84	6108	799	7.64456	6251.94	784.943	7.96484	7.94155	2.07211
3.864	6045	773	7.82018	6160	774.086	7.95778	7.94764	2.07287
3.888	5945	733	8.1105	6071.34	762.171	7.96585	7.95139	2.07335
3.912	5840	777	7.51609	5988.37	753.029	7.95238	7.95346	2.07361
3.936	5725	734	7.79973	5906.91	742.686	7.95345	7.95487	2.07378
3.96	5842	762	7.66667	5823.94	732.4	7.95186	7.95549	2.07386
3.984	5705	655	8.70992	5741.86	722.514	7.94705	7.95536	2.07385
4.008	5673	732	7.75	5657.2	711.8	7.94774	7.95689	2.07404
4.032	5438	690	7.88116	5579.34	701.6	7.95231	7.95617	2.07395
4.056	5534	654	8.46177	5501.97	691.943	7.95148	7.95628	2.07396
4.08	5370	665	8.07519	5432.78	682.027	7.96564	7.95673	2.07402
4.104	5358	628	8.53185	5355.3	672.486	7.96343	7.95664	2.07401
4.128	5262	603	8.72637	5287.14	663	7.97456	7.95821	2.0742
4.152	5178	646	8.01548	5212.03	654.946	7.95795	7.96395	2.07493
4.176	4991	660	7.56212	5140.84	646.351	7.95363	7.97116	2.07583
4.2	4930	608	8.10855	5069.51	637	7.95842	7.97678	2.07653
4.224	5033	607	8.2916	4998.05	628.622	7.95081	7.98297	2.07731
4.248	4787	606	7.89934	4924.11	618.27	7.96433	7.98933	2.07811
4.272	4777	646	7.39474	4858.49	606.486	8.01087	7.99731	2.07911
4.296	4680	555	8.43243	4796.84	597.243	8.03163	8.00726	2.08035
4.32	4738	595	7.96303	4737.69	591.231	8.01327	8.0202	2.08196
4.344	4587	620	7.39839	4678.33	582.333	8.03377	8.03196	2.08343
4.368	4626	567	8.15873	4616.08	574.615	8.03333	8.04528	2.08509
4.392	4475	575	7.78261	4556.69	565.179	8.06238	8.05919	2.08681
4.416	4429	575	7.70261	4498.9	557.667	8.06736	8.06854	2.08797
4.44	4429	529	8.3724	4439.31	548.333	8.096	8.07763	2.0891
4.464	4298	550	7.81455	4380.46	541.615	8.08777	8.08983	2.09061
4.488	4280	513	8.34308	4318.38	533.308	8.09736	8.09798	2.09162
4.512	4164	504	8.2619	4264.74	525.385	8.11737	8.10577	2.09258
4.536	4029	536	7.51679	4205.62	518.333	8.11373	8.11186	2.09333
4.56	4202	489	8.59305	4154.27	510.878	8.13162	8.11885	2.09419
4.584	4004	548	7.30657	4099.34	503.146	8.14741	8.12319	2.09472
4.608	3950	483	8.17805	4040.54	497.39	8.12347	8.12924	2.09547
4.632	3873	454	8.53084	3983.66	490.659	8.119	8.13433	2.09609
4.656	3881	479	8.1023	3929.83	483.415	8.12931	8.14038	2.09684
4.68	3734	456	8.1886	3880.63	476.488	8.14425	8.14835	2.09782
4.704	3844	434	8.85714	3832.37	470.585	8.14383	8.15564	2.09871
4.728	3827	457	8.37418	3781.41	463.732	8.15432	8.16324	2.09964
4.752	3618	511	7.08023	3734.41	458.024	8.15331	8.17689	2.10131
4.776	3669	449	8.17149	3686.56	450.463	8.18393	8.19086	2.10302
4.8	3730	426	8.75587	3644.09	444.326	8.2014	8.20687	2.10497
4.824	3517	432	8.1412	3599.26	438.302	8.21181	8.22454	2.10712
4.848	3524	409	8.61614	3549.88	431.279	8.23106	8.24327	2.1094
4.872	3471	441	7.87075	3506.44	423.814	8.27354	8.2635	2.11185
4.896	3518	398	8.8392	3459.53	418.186	8.27272	8.2852	2.11447
4.92	3410	393	8.67684	3417.79	411.512	8.30545	8.30374	2.11671
4.944	3252	408	7.97059	3372.84	404.488	8.33853	8.32219	2.11893
4.968	3346	381	8.78215	3330.23	398.837	8.34985	8.34197	2.1213
4.992	3228	379	8.51715	3288.21	392.535	8.37686	8.35907	2.12335
5.016	3220	360	8.94444	3246.74	386.884	8.39204	8.3739	2.12512
5.04	3086	371	8.31806	3208.44	382.511	8.38785	8.38933	2.12696
5.064	3118	348	8.95977	3169.38	377.111	8.40436	8.40142	2.1284
5.088	2947	392	7.51786	3131.82	371.533	8.42945	8.41225	2.12969
5.112	2930	327	8.96024	3090	367.022	8.41911	8.42359	2.13104
5.136	2971	349	8.51289	3050.69	361.6	8.43664	8.43271	2.13212
5.16	2974	376	7.90957	3014.16	357.022	8.44249	8.43868	2.13283
5.184	2951	366	8.06284	2979.13	353.044	8.43841	8.44634	2.13373
5.208	2944	326	9.03067	2941.96	347.844	8.45768	8.45753	2.13506
5.232	2860	372	7.68817	2908.29	343.178	8.47458	8.46724	2.1362
5.256	2815	336	8.37798	2871.71	338.756	8.47724	8.47821	2.1375
5.28	2766	311	8.89389	2838.89	335.66	8.45766	8.4893	2.13881
5.304	2781	326	8.53067	2803.55	330.915	8.47213	8.4998	2.14004
5.328	2752	296	9.2973	2770.89	324.936	8.5275	8.5147	2.14179
5.352	2615	293	8.92491	2736.85	320.617	8.5362	8.52746	2.14329
5.376	2719	299	9.09365	2700.57	316.234	8.5398	8.53849	2.14458
5.4	2609	325	8.02769	2667.55	311.681	8.5586	8.55196	2.14616
5.424	2680	288	9.30556	2634.21	307.809	8.55796	8.56977	2.14824
5.448	2496	273	9.14286	2602.13	302.489	8.60238	8.58638	2.15018
5.472	2597	286	9.08042	2567.51	298.617	8.598	8.59841	2.15158
5.496	2491	279	8.92832	2536.34	295.064	8.5959	8.60955	2.15287
5.52	2497	270	9.24815	2509.65	290.959	8.62545	8.62132	2.15424
5.544	2407	300	8.02333	2480.02	286.592	8.65349	8.632	2.15548
5.568	2363	277	8.53069	2449.35	283	8.65494	8.6469	2.1572
5.592	2406	261	9.21839	2418.73	279.306	8.6598	8.65807	2.15849
5.616	2339	285	8.20702	2390.51	276.082	8.65871	8.66941	2.1598
5.64	2320	286	8.11189	2363.9	272.673	8.66934	8.68072	2.1611
5.664	2235	304	7.35197	2336.69	269.327	8.67606	8.69124	2.16232
5.688	2306	277	8.32491	2312.37	265.122	8.72188	8.7022	2.16358
5.712	2297	275	8.35273	2287.24	262.143	8.72518	8.71209	2.16471
5.736	2208	245	9.01224	2260.45	259.143	8.72279	8.72624	2.16633
5.76	2219	246	9.02033	2236.84	256.51	8.7203	8.74274	2.16822
5.784	2198	235	9.35319	2211.84	253.039	8.74111	8.75984	2.17018
5.808	2164	271	7.98524	2185.43	249.078	8.77407	8.77746	2.17219
5.832	2037	261	7.8046	2158.63	246.314	8.76373	8.78934	2.17354
5.856	2166	234	9.25641	2132.65	241.922	8.81545	8.80216	2.175
5.88	2083	230	9.05652	2109.86	238.667	8.84021	8.81496	2.17645
5.904	2069	246	8.41057	2085.14	235.412	8.8574	8.82717	2.17783
5.928	2025	220	9.20455	2059.92	232.235	8.86998	8.83967	2.17925
5.952	1965	218	9.01376	2034.86	229.863	8.85251	8.84707	2.18009
5.976	1957	227	8.62115	2012.98	227.039	8.86622	8.85634	2.18113
6	1963	191	10.2775	1993.13	224.868	8.86357	8.86	2.18155
6.024	1891	216	8.75463	1968.57	222.321	8.85462	8.862	2.18177
6.048	1945	226	8.60619	1946.42	219.226	8.87856	8.86184	2.18175
6.072	1908	184	10.3696	1922.81	217.132	8.85549	8.86272	2.18185
6.096	1857	205	9.05854	1901.94	214.528	8.8657	8.86781	2.18243
6.12	1800	194	9.27835	1878.58	212.132	8.85573	8.87181	2.18288
6.144	1843	205	8.99024	1858.23	209.679	8.86223	8.8758	2.18333
6.168	1728	198	8.72727	1835.79	207.302	8.85565	8.88265	2.1841
6.192	1837	202	9.09406	1814.79	204.377	8.87962	8.89	2.18493
6.216	1782	204	8.73529	1794.98	201.491	8.90851	8.90511	2.18663
6.24	1785	184	9.70109	1776.55	199.382	8.91027	8.92274	2.1886
6.264	1755	186	9.43548	1755.58	197.091	8.90747	8.942	2.19076
6.288	1699	181	9.38674	1735.65	194.364	8.92993	8.9601	2.19278
6.312	1658	202	8.20792	1716.45	191.582	8.95938	8.97806	2.19478
6.336	1653	202	8.18317	1699.36	188.364	9.02172	8.99393	2.19655
6.36	1664	182	9.14286	1679.98	185.436	9.05961	9.00903	2.19823
6.384	1699	199	8.53769	1660.04	183.073	9.06763	9.02666	2.20018
6.408	1604	164	9.78049	1641.75	181.182	9.06131	9.05053	2.20282
6.432	1577	185	8.52432	1623	179.273	9.05325	9.07385	2.2054
6.456	1535	148	10.3716	1605.55	177.327	9.05414	9.09642	2.20788
6.48	1653	170	9.72353	1590.75	175.298	9.07456	9.11539	2.20996
6.504	1505	145	10.3793	1572.63	172.737	9.1042	9.13114	2.21169
6.528	1495	164	9.11585	1557.3	169.825	9.17004	9.14817	2.21355
6.552	1474	175	8.42286	1538.98	167.526	9.18651	9.16801	2.21572
6.576	1499	149	10.0604	1522.33	165.333	9.20766	9.18689	2.21778
6.6	1519	178	8.53371	1504.23	162.965	9.23038	9.20633	2.21989
6.624	1455	161	9.03727	1487.14	161.07	9.23287	9.2271	2.22214
6.648	1417	164	8.64024	1471.21	158.965	9.25494	9.24594	2.22418
6.672	1435	161	8.91304	1455.91	156.895	9.27955	9.2575	2.22543
6.696	1429	177	8.07345	1439.67	155.456	9.26092	9.26697	2.22646
6.72	1390	135	10.2963	1425.54	153.814	9.26799	9.27475	2.2273
6.744	1359	159	8.54717	1410.75	151.644	9.30301	9.28109	2.22798
6.768	1412	149	9.47651	1394.36	149.746	9.31149	9.28985	2.22892
6.792	1308	144	9.08333	1378.19	148.237	9.29716	9.29854	2.22986
6.816	1294	145	8.92414	1363.37	146.746	9.29071	9.30417	2.23046
6.84	1313	124	10.5887	1348.78	145.136	9.29324	9.31432	2.23155
6.864	1279	149	8.58389	1333.69	143.407	9.30008	9.3255	2.23275
6.888	1297	138	9.39855	1321.44	141.644	9.3293	9.33483	2.23375
6.912	1253	135	9.28148	1306.22	139.695	9.35052	9.34359	2.23469
6.936	1243	135	9.20741	1290.69	138.169	9.34139	9.35567	2.23598
6.96	1264	133	9.50376	1279.44	136.508	9.37264	9.37148	2.23767
6.984	1295	127	10.1969	1265.48	134.754	9.391	9.38603	2.23922
7.008	1240	116	10.6897	1251.41	133.049	9.40562	9.40294	2.24102
7.032	1200	145	8.27586	1238.28	131.623	9.40777	9.4169	2.24251
7.056	1202	141	8.52482	1224.98	129.902	9.43009	9.43057	2.24396
7.08	1188	141	8.42553	1211.31	127.984	9.46458	9.44745	2.24574
7.104	1238	128	9.67188	1198.41	126.77	9.45338	9.46206	2.24729
7.128	1208	120	10.0667	1184.82	124.902	9.48602	9.47603	2.24877
7.152	1160	119	9.7479	1172.15	123.607	9.48289	9.48756	2.24998
7.176	1131	125	9.048	1159.43	122.033	9.50094	9.50029	2.25132
7.2	1163	95	12.2421	1149.29	120.635	9.52697	9.51228	2.25258
7.224	1122	103	10.8932	1137.81	119.349	9.53345	9.5213	2.25353
7.248	1134	105	10.8	1124.14	117.778	9.54461	9.53366	2.25483
7.272	1037	111	9.34234	1113.17	116.778	9.53242	9.54504	2.25602
7.296	1051	112	9.38393	1101.63	115.381	9.54781	9.55994	2.25758
7.32	1057	98	10.7857	1090.52	114.048	9.562	9.57536	2.25919
7.344	1085	109	9.95413	1078.13	112.73	9.56378	9.59012	2.26073
7.368	1037	109	9.51376	1065.79	111.143	9.5894	9.60866	2.26267
7.392	1019	99	10.2929	1055.1	109.778	9.61119	9.62369	2.26423
7.416	1027	115	8.93043	1044.3	108.254	9.64677	9.64195	2.26612
7.44	1018	88	11.5682	1034.6	106.985	9.67055	9.66068	2.26806
7.464	978	114	8.57895	1023.34	105.615	9.68929	9.67984	2.27005
7.488	954	95	10.0421	1012.25	103.954	9.73746	9.69923	2.27205
7.512	983	117	8.40171	1001.62	103.154	9.70992	9.71638	2.27381
7.536	939	99	9.48485	991.6	101.877	9.73331	9.73565	2.27579
7.56	953	103	9.25243	980.631	100.538	9.75379	9.75203	2.27748
7.584	1005	94	10.6915	970.662	99.3231	9.77277	9.76664	2.27897
7.608	939	87	10.7931	961.462	98.3385	9.77707	9.78117	2.28046
7.632	866	114	7.59649	951.631	97.3231	9.77806	9.79126	2.28149
7.656	953	81	11.7654	942.723	95.9692	9.82318	9.80421	2.28281
7.68	942	94	10.0213	934.582	95.1045	9.8269	9.81398	2.28381
7.704	933	77	12.1169	924.582	94.0448	9.8313	9.82087	2.28451
7.728	897	82	10.939	915.97	93	9.84914	9.83071	2.28551
7.752	898	94	9.55319	907.09	92.1045	9.84848	9.84321	2.28678
7.776	847	97	8.73196	897.448	91.0896	9.85237	9.85713	2.2882
7.8	819	85	9.63529	886.985	90.1343	9.8407	9.86284	2.28877
7.824	877	108	8.12037	877.478	89.2687	9.82963	9.86945	2.28944
7.848	870	85	10.2353	868.94	87.9403	9.88103	9.87721	2.29023
7.872	831	85	9.77647	860.194	86.7612	9.9145	9.88533	2.29105
7.896	801	89	9	851.119	85.7015	9.93121	9.89624	2.29215
7.92	858	87	9.86207	843.609	85.3333	9.88604	9.9044	2.29298
7.944	822	69	11.913	833.71	84.2174	9.8995	9.91195	2.29374
7.968	812	67	12.1194	824.957	83.1884	9.91672	9.9193	2.29448
7.992	792	71	11.1549	816.246	82.1304	9.93842	9.92229	2.29478
8.016	814	82	9.92683	807.594	81.0145	9.96852	9.92243	2.2948
8.04	768	76	10.1053	798.681	80.3333	9.94209	9.92094	2.29465
8.064	774	91	8.50549	790.594	79.6667	9.92378	9.92015	2.29457
8.088	718	66	10.8788	781.638	78.8696	9.91051	9.91778	2.29433
8.112	742	78	9.51282	774.435	78.1159	9.91391	9.91686	2.29424
8.136	781	75	10.4133	767.13	77.3623	9.91607	9.91438	2.29399
8.16	737	68	10.8382	760.225	76.6761	9.91477	9.91279	2.29383
8.184	753	72	10.4583	752.211	76.1549	9.87738	9.91242	2.29379
8.208	705	62	11.371	743.845	75.338	9.87343	9.91828	2.29438
8.232	703	72	9.76389	736.014	74.2958	9.90654	9.92478	2.29503
8.256	708	69	10.2609	728.817	73.5352	9.91113	9.93388	2.29595
8.28	699	83	8.42169	721.662	72.5211	9.95106	9.9427	2.29684
8.304	708	76	9.31579	713.859	71.831	9.93804	9.95265	2.29784
8.328	699	62	11.2742	707.901	70.8732	9.98828	9.9659	2.29917
8.352	660	65	10.1538	701.831	70.3099	9.98197	9.97901	2.30048
8.376	696	81	8.59259	694.775	69.3803	10.014	9.98617	2.3012
8.4	674	58	11.6207	688.986	68.8082	10.0131	9.99957	2.30254
8.424	700	61	11.4754	682.603	68.0959	10.0241	10.0059	2.30317
8.448	666	63	10.5714	675.808	67.4247	10.0232	10.0146	2.30405
8.472	674	71	9.49296	668.849	66.7671	10.0176	10.0153	2.30411
8.496	627	67	9.35821	662.178	66.3151	9.98533	10.0162	2.30421
8.52	676	65	10.4	656.562	65.274	10.0586	10.016	2.30419
8.544	648	75	8.64	649.397	64.8082	10.0203	10.0163	2.30421
8.568	618	65	9.50769	642.466	64.0274	10.0342	10.0198	2.30456
8.592	594	63	9.42857	635.356	63.5616	9.99591	10.0258	2.30516
8.616	603	58	10.3966	628.945	62.9452	9.99195	10.0355	2.30613
8.64	628	56	11.2143	624.08	62.3333	10.012	10.0484	2.30741
8.664	616	62	9.93548	617.76	61.68	10.0156	10.0544	2.30801
8.688	580	70	8.28571	611.853	60.8	10.0634	10.0674	2.3093
8.712	596	65	9.16923	606.293	60.0933	10.0892	10.0824	2.31079
8.736	588	81	7.25926	599.92	59.2533	10.1247	10.0986	2.31239
8.76	555	51	10.8824	593.667	58.6267	10.1262	10.1158	2.3141
8.784	604	49	12.3265	588.2	58.0933	10.1251	10.1307	2.31558
8.808	559	46	12.1522	582.947	57.36	10.1629	10.1452	2.317
8.832	534	48	11.125	576.907	56.56	10.1999	10.1553	2.31799
8.856	548	48	11.4167	571.48	56.1733	10.1735	10.1615	2.3186
8.88	564	57	9.89474	567.143	55.7013	10.1819	10.166	2.31904
8.904	516	50	10.32	561.922	55.2208	10.1759	10.1704	2.31949
8.928	540	59	9.15254	556.844	54.7273	10.1749	10.1765	2.32008
8.952	547	60	9.11667	551.104	54.1688	10.1738	10.1773	2.32016
8.976	532	57	9.33333	546.247	53.7792	10.1572	10.175	2.31993
9	512	49	10.449	541.078	53.1818	10.1741	10.1775	2.32018
9.024	488	61	8	536.532	52.7273	10.1756	10.1783	2.32026
9.048	491	51	9.62745	531.675	52.1688	10.1914	10.1804	2.32047
9.072	481	35	13.7429	526.052	51.7143	10.1723	10.1823	2.32065
9.096	508	45	11.2889	521	51.2078	10.1742	10.183	2.32072
9.12	519	43	12.0698	517.139	50.6962	10.2007	10.1909	2.3215
9.144	464	39	11.8974	511.481	50.1899	10.1909	10.2022	2.32261
9.168	555	46	12.0652	507.266	49.7342	10.1995	10.2106	2.32342
9.192	523	55	9.50909	502.785	49.3165	10.1951	10.2165	2.324
9.216	482	51	9.45098	498.127	48.9241	10.1816	10.2282	2.32515
9.24	489	57	8.57895	493.684	48.1899	10.2445	10.2403	2.32633
9.264	478	40	11.95	488.861	47.4684	10.2987	10.2489	2.32717
9.288	473	47	10.0638	484.38	47.1772	10.2672	10.2575	2.32801
9.312	457	54	8.46296	479.835	46.7848	10.2562	10.2658	2.32882
9.336	497	46	10.8043	475.582	46.1646	10.3019	10.2764	2.32985
9.36	452	54	8.37037	472.062	45.8025	10.3065	10.288	2.33098
9.384	456	38	12	467.37	45.3951	10.2956	10.2949	2.33165
9.408	430	47	9.14894	462.481	44.963	10.2858	10.3	2.33215
9.432	436	37	11.7838	458.235	44.5309	10.2903	10.3083	2.33295
9.456	414	43	9.62791	453.864	44.0123	10.3122	10.3189	2.33397
9.48	429	37	11.5946	449.667	43.6173	10.3094	10.3266	2.33472
9.504	433	37	11.7027	445.037	43.1235	10.3201	10.3349	2.33553
9.528	460	43	10.6977	440.926	42.5802	10.3552	10.3455	2.33655
9.552	424	45	9.42222	436.951	42.1852	10.3579	10.3595	2.3379
9.576	404	31	13.0323	433.346	41.7778	10.3726	10.3753	2.33943
9.6	402	32	12.5625	429.976	41.3976	10.3865	10.3907	2.34092
9.624	399	45	8.86667	425.952	40.9639	10.3982	10.4111	2.34287
9.648	401	38	10.5526	421.759	40.506	10.4123	10.4298	2.34467
9.672	421	45	9.35556	417.578	40	10.4395	10.4446	2.34609
9.696	407	34	11.9706	413.675	39.5301	10.4648	10.4589	2.34745
9.72	405	27	15	409.675	39.0843	10.4818	10.4724	2.34874
9.744	415	40	10.375	405.458	38.494	10.533	10.4842	2.34987
9.768	420	40	10.5	401.639	38.1566	10.526	10.4934	2.35075
9.792	389	36	10.8056	397.53	37.7952	10.518	10.5036	2.35171
9.816	410	30	13.6667	393.88	37.4578	10.5153	10.5104	2.35236
9.84	401	33	12.1515	390.247	37.0941	10.5205	10.5161	2.35291
9.864	372	39	9.53846	386.906	36.7882	10.5171	10.5246	2.35372
9.888	394	46	8.56522	383.412	36.5176	10.4994	10.5309	2.35431
9.912	376	45	8.35556	379.6	36.0706	10.5238	10.5397	2.35515
9.936	368	31	11.871	376.424	35.8	10.5146	10.5547	2.35657
9.96	368	35	10.5143	372.941	35.4235	10.5281	10.574	2.3584
9.984	348	40	8.7	369.129	34.9059	10.575	10.5942	2.3603
10.008	348	29	12	365.576	34.4824	10.6018	10.6121	2.362
10.032	368	31	11.871	362.424	34.1176	10.6228	10.631	2.36377
10.056	369	31	11.9032	359.329	33.6353	10.6831	10.6487	2.36544
10.08	306	32	9.5625	356.368	33.2184	10.728	10.6651	2.36698
10.104	372	26	14.3077	352.885	32.8506	10.7421	10.6783	2.36821
10.128	349	39	8.94872	349.897	32.6552	10.7149	10.6933	2.36962
10.152	340	38	8.94737	346.678	32.3793	10.7068	10.7069	2.37089
10.176	348	25	13.92	343.609	32.0575	10.7185	10.7237	2.37246
10.2	327	19	17.2105	340.759	31.8621	10.6948	10.7384	2.37382
10.224	345	39	8.84615	336.874	31.5632	10.673	10.7468	2.37461
10.248	301	34	8.85294	333.448	31.046	10.7405	10.7579	2.37564
10.272	360	32	11.25	330.092	30.7011	10.7518	10.7773	2.37744
10.296	351	32	10.9688	326.966	30.2529	10.8078	10.7984	2.3794
10.32	315	31	10.1613	324.337	29.9101	10.8437	10.8251	2.38187
10.344	294	25	11.76	321.348	29.6966	10.821	10.8509	2.38425
10.368	304	26	11.6923	318.36	29.3034	10.8643	10.8838	2.38728
10.392	322	28	11.5	315.449	28.8652	10.9284	10.906	2.38931
10.416	320	29	11.0345	312.056	28.5281	10.9386	10.9302	2.39153
10.44	287	35	8.2	308.843	28.0449	11.0124	10.9519	2.39352
10.464	301	25	12.04	305.685	27.8427	10.979	10.9717	2.39532
10.488	315	31	10.1613	302.899	27.4494	11.0348	10.9903	2.39701
10.512	296	33	8.9697	300.157	27.3258	10.9844	11.0037	2.39823
10.536	302	30	10.0667	297.742	27.0225	11.0183	11.0136	2.39913
10.56	300	32	9.375	295.462	26.7473	11.0464	11.0178	2.39952
10.584	287	20	14.35	292.692	26.4615	11.061	11.016	2.39935
10.608	269	22	12.2273	289.824	26.2857	11.0259	11.0201	2.39972
10.632	280	18	15.5556	286.648	26.033	11.011	11.0237	2.40005
10.656	269	20	13.45	283.835	25.7143	11.038	11.0367	2.40122
10.68	256	31	8.25806	281.505	25.6264	10.985	11.0455	2.40202
10.704	264	28	9.42857	279.033	25.3846	10.9922	11.0511	2.40253
10.728	238	32	7.4375	276.44	25.0769	11.0237	11.0522	2.40263
10.752	238	23	10.3478	274.187	24.7582	11.0746	11.058	2.40316
10.776	263	19	13.8421	271.209	24.3736	11.1271	11.0653	2.40381
10.8	256	18	14.2222	268.925	24.1935	11.1156	11.0712	2.40435
10.824	240	26	9.23077	266.484	23.9892	11.1085	11.0804	2.40518
10.848	239	18	13.2778	263.839	23.828	11.0727	11.0887	2.40593
10.872	250	22	11.3636	261.032	23.5376	11.09	11.0977	2.40674
10.896	251	25	10.04	258.065	23.2688	11.0906	11.1066	2.40754
10.92	240	19	12.6316	255.731	23.0323	11.1032	11.1103	2.40787
10.944	246	27	9.11111	253.194	22.8387	11.0862	11.1196	2.40871
10.968	244	27	9.03704	250.634	22.6129	11.0837	11.1281	2.40947
10.992	223	16	13.9375	248.419	22.3333	11.1233	11.1433	2.41084
11.016	230	21	10.9524	245.667	21.9892	11.1721	11.1599	2.41233
11.04	244	18	13.5556	243.453	21.8	11.1676	11.1747	2.41365
11.064	225	20	11.25	240.537	21.4421	11.218	11.1868	2.41473
11.088	246	14	17.5714	238.063	21.2526	11.2016	11.1994	2.41586
11.112	215	17	12.6471	235.937	20.9895	11.2407	11.2161	2.41735
11.136	188	19	9.89474	233.863	20.7474	11.2719	11.2265	2.41828
11.16	221	18	12.2778	231.474	20.5684	11.2538	11.2284	2.41845
11.184	228	21	10.8571	229.095	20.3895	11.2359	11.2356	2.41909
11.208	252	15	16.8	226.495	20.1789	11.2243	11.2428	2.41972
11.232	216	22	9.81818	224.768	19.9474	11.2681	11.2516	2.42051
11.256	217	20	10.85	222.274	19.7789	11.2379	11.2485	2.42024
11.28	225	10	22.5	220.165	19.6701	11.1929	11.2473	2.42013
11.304	190	21	9.04762	217.979	19.3814	11.2468	11.2444	2.41987
11.328	217	18	12.0556	215.68	19.0928	11.2964	11.2371	2.41922
11.352	204	15	13.6	213.515	18.8969	11.299	11.2324	2.4188
11.376	216	15	14.4	211.309	18.8557	11.2067	11.2246	2.41811
11.4	212	21	10.0952	209.041	18.567	11.2587	11.2204	2.41773
11.424	207	12	17.25	207.072	18.4536	11.2212	11.2176	2.41749
11.448	198	15	13.2	204.608	18.3402	11.1563	11.2113	2.41692
11.472	195	16	12.1875	202.371	18.1134	11.1725	11.2009	2.41599
11.496	166	11	15.0909	200.474	17.9278	11.1823	11.1903	2.41504
11.52	175	20	8.75	199.071	17.7879	11.1914	11.1917	2.41517
11.544	182	12	15.1667	197.323	17.6768	11.1629	11.1873	2.41478
11.568	192	26	7.38462	195.313	17.4747	11.1769	11.1845	2.41453
11.592	199	16	12.4375	193.374	17.2929	11.1822	11.1936	2.41535
11.616	210	13	16.1538	191.333	17.1111	11.1818	11.2046	2.41632
11.64	178	16	11.125	189.646	16.899	11.2224	11.2125	2.41703
11.664	177	11	16.0909	187.98	16.7677	11.2108	11.2251	2.41815
11.688	172	21	8.19048	185.828	16.6061	11.1904	11.2353	2.41906
11.712	171	20	8.55	183.97	16.3434	11.2565	11.2436	2.4198
11.736	168	16	10.5	182.051	16.1212	11.2926	11.2476	2.42015
11.76	192	23	8.34783	180.644	16.0297	11.2693	11.248	2.42019
11.784	177	10	17.7	178.822	15.7822	11.3306	11.2465	2.42006
11.808	163	17	9.58824	177.05	15.703	11.2749	11.2478	2.42017
11.832	196	9	21.7778	175.495	15.5743	11.2683	11.2597	2.42123
11.856	150	10	15	173.832	15.4851	11.2257	11.2653	2.42172
11.88	169	18	9.38889	172.109	15.3861	11.186	11.2625	2.42148
11.904	161	14	11.5	170.545	15.2178	11.2069	11.2618	2.42142
11.928	180	15	12	168.812	15.0396	11.2245	11.2549	2.42081
11.952	159	12	13.25	167.584	14.802	11.3217	11.2565	2.42094
11.976	154	13	11.8462	166.287	14.6931	11.3174	11.257	2.42099
12	144	15	9.6	164.893	14.6408	11.2626	11.2629	2.42152
12.024	172	14	12.2857	163.34	14.5049	11.261	11.2711	2.42224
12.048	174	12	14.5	161.835	14.3786	11.2552	11.2778	2.42284
12.072	163	12	13.5833	160.388	14.2039	11.2919	11.2904	2.42396
12.096	166	13	12.7692	159.155	14.1165	11.2744	11.2992	2.42473
12.12	138	14	9.85714	157.631	13.9612	11.2907	11.3109	2.42576
12.144	148	17	8.70588	156.107	13.8447	11.2756	11.3215	2.4267
12.168	133	9	14.7778	154.864	13.7282	11.2808	11.3329	2.42771
12.192	99	11	9	153.573	13.5146	11.3635	11.3435	2.42864
12.216	133	13	10.2308	152.087	13.3204	11.4176	11.3492	2.42915
12.24	166	10	16.6	150.981	13.1905	11.4462	11.3504	2.42925
12.264	151	17	8.88235	149.562	13.1429	11.3797	11.3492	2.42914
12.288	121	12	10.0833	148.133	13.0095	11.3865	11.3501	2.42923
12.312	142	14	10.1429	146.638	12.8952	11.3715	11.35	2.42922
12.336	122	11	11.0909	145.343	12.8	11.3549	11.3438	2.42867
12.36	142	10	14.2	143.829	12.7429	11.287	11.3374	2.42811
12.384	135	10	13.5	142.524	12.6381	11.2773	11.3202	2.42659
12.408	128	18	7.11111	141.457	12.5333	11.2865	11.3129	2.42594
12.432	112	11	10.1818	140.076	12.419	11.2791	11.3049	2.42524
12.456	137	11	12.4545	138.771	12.2857	11.2953	11.2908	2.42399
12.48	117	10	11.7	137.972	12.1589	11.3474	11.2794	2.42298
12.504	138	6	23	136.243	12.1028	11.2571	11.2709	2.42223
12.528	113	15	7.53333	135.056	11.9533	11.2987	11.2585	2.42113
12.552	125	11	11.3636	133.794	11.8411	11.2991	11.2431	2.41975
12.576	110	23	4.78261	132.495	11.8131	11.216	11.229	2.4185
12.6	121	21	5.7619	131.402	11.7009	11.23	11.2121	2.41699
12.624	134	10	13.4	130.14	11.6262	11.1937	11.1852	2.41459
12.648	131	13	10.0769	128.794	11.5607	11.1407	11.1618	2.4125
12.672	128	14	9.14286	127.477	11.4673	11.1165	11.1324	2.40986
12.696	134	8	16.75	126.215	11.3458	11.1244	11.0992	2.40687
12.72	121	14	8.64286	125.358	11.2844	11.1089	11.0762	2.4048
12.744	105	6	17.5	124.101	11.2294	11.0515	11.0456	2.40203
12.768	130	10	13	123.018	11.1835	11	11.0286	2.40049
12.792	118	11	10.7273	121.835	11.1009	10.9752	11.0149	2.39925
12.816	120	14	8.57143	121.073	11.0734	10.9337	10.9975	2.39766
12.84	136	12	11.3333	120.202	10.9633	10.964	10.9729	2.39543
12.864	102	15	6.8	119.119	10.9358	10.8926	10.9498	2.39332
12.888	112	7	16	118.046	10.7248	11.0068	10.93	2.39151
12.912	112	8	14	116.862	10.633	10.9905	10.9194	2.39054
12.936	103	12	8.58333	115.358	10.5596	10.9244	10.9161	2.39024
12.96	119	11	10.8182	114.414	10.5405	10.8547	10.919	2.3905
12.984	116	7	16.5714	113.333	10.4414	10.8542	10.9246	2.39101
13.008	108	12	9	112.441	10.3784	10.8342	10.933	2.39179
13.032	112	9	12.4444	111.378	10.2342	10.8829	10.9299	2.3915
13.056	112	9	12.4444	110.577	10.1081	10.9394	10.917	2.39032
13.08	95	10	9.5	109.649	10	10.9649	10.913	2.38995
13.104	98	14	7	108.568	9.84685	11.0256	10.9119	2.38986
13.128	89	10	8.9	107.676	9.8018	10.9853	10.9148	2.39012
13.152	114	8	14.25	106.856	9.73874	10.9722	10.9218	2.39076
13.176	107	12	8.91667	105.658	9.73874	10.8492	10.9241	2.39097
13.2	82	15	5.46667	104.947	9.64602	10.8798	10.9171	2.39033
13.224	107	9	11.8889	104.212	9.61062	10.8435	10.9081	2.38951
13.248	103	5	20.6	103.274	9.48673	10.8862	10.8957	2.38837
13.272	101	5	20.2	102.345	9.38053	10.9104	10.8847	2.38736
13.296	91	8	11.375	101.265	9.28319	10.9085	10.8705	2.38605
13.32	112	9	12.4444	100.363	9.23894	10.863	10.8677	2.38579
13.344	93	6	15.5	99.5221	9.15929	10.8657	10.861	2.38518
13.368	94	13	7.23077	98.7699	9.0708	10.8888	10.8553	2.38465
13.392	112	7	16	97.6814	8.99115	10.8642	10.847	2.38389
13.416	113	5	22.6	96.6726	8.93805	10.8158	10.8363	2.38291
13.44	91	7	13	95.9565	8.86957	10.8186	10.82	2.3814
13.464	97	7	13.8571	95	8.7913	10.8061	10.8099	2.38046
13.488	91	6	15.1667	94.0261	8.72174	10.7807	10.8054	2.38004
13.512	74	11	6.72727	93.4	8.65217	10.795	10.7907	2.37869
13.536	80	7	11.4286	92.6348	8.58261	10.7933	10.7845	2.37811
13.56	87	6	14.5	91.8	8.55652	10.7287	10.7832	2.37799
13.584	89	10	8.9	91.4348	8.50435	10.7515	10.7849	2.37814
13.608	87	8	10.875	90.7652	8.3913	10.8166	10.7908	2.37869
13.632	78	6	13	89.7391	8.36522	10.7277	10.797	2.37927
13.656	76	8	9.5	88.8957	8.23478	10.7951	10.7972	2.37928
13.68	76	6	12.6667	88.0769	8.15385	10.8019	10.7932	2.37891
13.704	91	7	13	87.5299	8.07692	10.837	10.801	2.37964
13.728	99	3	33	86.6923	7.97436	10.8714	10.8068	2.38018
13.752	93	8	11.625	86.0513	7.93162	10.8491	10.807	2.3802
13.776	67	9	7.44444	85.265	7.89744	10.7965	10.8166	2.38108
13.8	89	6	14.8333	84.6154	7.87179	10.7492	10.8291	2.38223
13.824	82	8	10.25	84.0256	7.76923	10.8152	10.8367	2.38294
13.848	86	7	12.2857	83.4701	7.71795	10.8151	10.8459	2.38379
13.872	73	9	8.11111	82.8547	7.65812	10.8192	10.8523	2.38437
13.896	82	10	8.2	82.3077	7.59829	10.8324	10.8758	2.38654
13.92	60	8	7.5	81.8571	7.48739	10.9327	10.9166	2.39028
13.944	75	5	15	81.0504	7.44538	10.886	10.9618	2.39441
13.968	77	8	9.625	80.521	7.36134	10.9384	11.0065	2.39849
13.992	81	10	8.1	79.8992	7.30252	10.9413	11.0569	2.40306
14.016	78	6	13	79.3445	7.14286	11.1082	11.1009	2.40703
14.04	70	6	11.6667	78.7143	7	11.2449	11.1465	2.41112
14.064	80	10	8	77.9664	6.93277	11.2461	11.1843	2.41451
14.088	66	7	9.42857	77.2521	6.83193	11.3075	11.2175	2.41748
14.112	83	8	10.375	76.5294	6.73109	11.3695	11.2397	2.41945
14.136	80	8	10	75.7983	6.70588	11.3033	11.2652	2.42172
14.16	64	9	7.11111	75.3058	6.64463	11.3333	11.2822	2.42322
14.184	75	3	25	74.6612	6.57851	11.3492	11.2903	2.42394
14.208	70	6	11.6667	74.1074	6.58678	11.2509	11.3008	2.42487
14.232	46	5	9.2	73.3802	6.56198	11.1826	11.3042	2.42517
14.256	59	12	4.91667	72.8017	6.4876	11.2217	11.2983	2.42465
14.28	67	7	9.57143	72.157	6.38843	11.295	11.3	2.4248
14.304	58	5	11.6	71.4711	6.30579	11.3342	11.2993	2.42474
14.328	78	4	19.5	70.9835	6.24793	11.3611	11.2924	2.42413
14.352	54	5	10.8	70.3223	6.19835	11.3453	11.2913	2.42404
14.376	82	6	13.6667	69.6942	6.16529	11.3043	11.3012	2.42491
14.4	65	4	16.25	69.2195	6.11382	11.3218	11.3088	2.42558
14.424	72	6	12	68.6911	6.06504	11.3257	11.312	2.42586
14.448	78	5	15.6	68.0976	6.04065	11.2732	11.3152	2.42614
14.472	72	10	7.2	67.439	6	11.2398	11.3253	2.42704
14.496	63	9	7	66.8293	5.9187	11.2912	11.3406	2.42839
14.52	68	2	34	66.2683	5.86179	11.3051	11.3583	2.42995
14.544	63	7	9	65.6748	5.79675	11.3296	11.3727	2.43121
14.568	67	6	11.1667	65.2602	5.73984	11.3697	11.3843	2.43224
14.592	63	4	15.75	64.8211	5.65041	11.4719	11.408	2.43432
14.616	56	2	28	64.4065	5.5935	11.5145	11.4311	2.43634
14.64	58	4	14.5	64.024	5.568	11.4986	11.4379	2.43693
14.664	57	7	8.14286	63.368	5.52	11.4797	11.4399	2.43711
14.688	59	4	14.75	62.768	5.48	11.454	11.4405	2.43716
14.712	59	5	11.8	62.376	5.408	11.534	11.4324	2.43645
14.736	49	5	9.8	61.792	5.376	11.494	11.4137	2.43482
14.76	60	6	10	61.192	5.384	11.3655	11.3953	2.4332
14.784	47	8	5.875	60.624	5.352	11.3274	11.3873	2.4325
14.808	64	2	32	60.216	5.312	11.3358	11.3787	2.43174
14.832	53	3	17.6667	59.56	5.28	11.2803	11.3623	2.4303
14.856	54	5	10.8	59.04	5.24	11.2672	11.3404	2.42837
14.88	66	6	11	58.7874	5.19685	11.3121	11.3231	2.42684
14.904	60	9	6.66667	58.3071	5.11024	11.4099	11.3118	2.42585
14.928	37	6	6.16667	57.7323	5.07087	11.3851	11.3143	2.42607
14.952	57	5	11.4	57.0787	5.06299	11.2737	11.321	2.42666
14.976	56	0	#DIV/0!	56.7323	5.02362	11.2931	11.3296	2.42742
15	48	7	6.85714	56.252	4.97638	11.3038	11.3377	2.42813
15.024	54	2	27	55.7638	4.96063	11.2413	11.3438	2.42867
15.048	48	4	12	55.4331	4.88189	11.3548	11.3365	2.42803
15.072	34	3	11.3333	55.0709	4.82677	11.4095	11.3306	2.4275
15.096	57	3	19	54.6378	4.80315	11.3754	11.3395	2.4283
15.12	44	2	22	54.4031	4.7907	11.356	11.3429	2.42859
15.144	47	6	7.83333	53.9845	4.74419	11.3791	11.3437	2.42866
15.168	50	6	8.33333	53.5736	4.72868	11.3295	11.3407	2.42839
15.192	59	7	8.42857	53.1783	4.69767	11.3201	11.3263	2.42713
15.216	59	6	9.83333	52.8062	4.64341	11.3723	11.3081	2.42552
15.24	47	5	9.4	52.4341	4.62791	11.33	11.2935	2.42423
15.264	65	4	16.25	51.9147	4.58915	11.3125	11.2818	2.42319
15.288	53	3	17.6667	51.3488	4.5814	11.2081	11.2679	2.42196
15.312	49	0	#DIV/0!	50.7752	4.53488	11.1966	11.257	2.42099
15.336	62	2	31	50.5736	4.51163	11.2096	11.2531	2.42064
15.36	42	1	42	50.1679	4.47328	11.215	11.2438	2.41982
15.384	50	5	10	49.7939	4.43511	11.2272	11.2391	2.4194
15.408	51	4	12.75	49.3588	4.39695	11.2257	11.2325	2.41882
15.432	44	4	11	48.8626	4.35878	11.2102	11.2402	2.4195
15.456	46	4	11.5	48.5496	4.30534	11.2766	11.2561	2.42091
15.48	45	2	22.5	48.0916	4.26718	11.2701	11.2756	2.42264
15.504	46	1	46	47.8702	4.24427	11.2788	11.2978	2.42461
15.528	42	2	21	47.5344	4.22901	11.2401	11.3177	2.42637
15.552	47	5	9.4	47.1527	4.17557	11.2925	11.3435	2.42865
15.576	52	3	17.3333	46.7863	4.1145	11.3711	11.3713	2.43109
15.6	40	3	13.3333	46.5564	4.07519	11.4244	11.3905	2.43278
15.624	43	6	7.16667	46.1805	4.03008	11.459	11.411	2.43457
15.648	38	7	5.42857	45.8722	4.00752	11.4465	11.4396	2.43708
15.672	42	7	6	45.5188	3.95489	11.5095	11.47	2.43973
15.696	48	2	24	45.1955	3.92481	11.5153	11.4965	2.44204
15.72	42	2	21	44.7444	3.89474	11.4884	11.5127	2.44345
15.744	53	2	26.5	44.3383	3.85714	11.4951	11.5275	2.44473
15.768	43	8	5.375	44.0226	3.79699	11.5941	11.5557	2.44718
15.792	32	1	32	43.6842	3.77444	11.5737	11.5878	2.44996
15.816	36	4	9	43.3759	3.74436	11.5843	11.6048	2.45141
15.84	36	2	18	43.1185	3.73333	11.5496	11.6201	2.45274
15.864	45	4	11.25	43	3.71111	11.5868	11.6404	2.45448
15.888	38	6	6.33333	42.7185	3.62963	11.7694	11.6507	2.45536
15.912	46	8	5.75	42.3926	3.59259	11.8	11.6532	2.45558
15.936	35	2	17.5	42.1037	3.6	11.6955	11.6572	2.45593
15.96	33	2	16.5	41.7185	3.57037	11.6846	11.6673	2.45679
15.984	43	2	21.5	41.4667	3.54074	11.7113	11.6747	2.45742
16.008	39	1	39	41.0148	3.53333	11.608	11.6883	2.45859
16.032	44	3	14.6667	40.7185	3.5037	11.6216	11.696	2.45925
16.056	44	3	14.6667	40.363	3.47407	11.6183	11.6842	2.45824
16.08	38	3	12.6667	40.1241	3.43066	11.6957	11.6855	2.45835
16.104	45	1	45	39.7299	3.41606	11.6303	11.6898	2.45872
16.128	36	7	5.14286	39.4088	3.35766	11.737	11.692	2.4589
16.152	32	2	16	39.1095	3.29927	11.854	11.6994	2.45954
16.176	32	7	4.57143	38.7591	3.32117	11.6703	11.706	2.4601
16.2	33	6	5.5	38.4599	3.28467	11.7089	11.7072	2.4602
16.224	34	5	6.8	38.1095	3.24818	11.7326	11.7103	2.46047
16.248	28	6	4.66667	37.8613	3.22628	11.7353	11.721	2.46138
16.272	30	1	30	37.6277	3.21898	11.6893	11.7205	2.46134
16.296	40	3	13.3333	37.3869	3.19708	11.6941	11.7136	2.46075
16.32	30	5	6	37.2374	3.20144	11.6315	11.7272	2.46191
16.344	28	1	28	36.964	3.15108	11.7306	11.7476	2.46365
16.368	40	4	10	36.7626	3.1295	11.7471	11.7523	2.46405
16.392	46	1	46	36.4604	3.10791	11.7315	11.7529	2.4641
16.416	33	2	16.5	36.2662	3.07914	11.778	11.7586	2.46458
16.44	39	2	19.5	35.9712	3.04317	11.8203	11.7594	2.46465
16.464	30	4	7.5	35.7986	3	11.9329	11.7716	2.46569
16.488	47	2	23.5	35.5252	3.01439	11.7852	11.7862	2.46693
16.512	36	1	36	35.3094	3.00719	11.7416	11.8081	2.46878
16.536	29	4	7.25	35.0863	2.98561	11.7518	11.8336	2.47094
16.56	32	1	32	34.8582	2.97872	11.7024	11.8406	2.47153
16.584	34	0	#DIV/0!	34.5461	2.93617	11.7657	11.8399	2.47147
16.608	32	3	10.6667	34.2411	2.87943	11.8916	11.8231	2.47006
16.632	38	5	7.6	34.1773	2.85106	11.9876	11.8174	2.46957
16.656	41	3	13.6667	33.9078	2.8227	12.0126	11.8166	2.46951
16.68	35	4	8.75	33.6312	2.83688	11.855	11.8192	2.46973
16.704	34	6	5.66667	33.4255	2.82979	11.812	11.8211	2.46989
16.728	27	2	13.5	33.1631	2.8227	11.7487	11.8095	2.4689
16.752	28	1	28	32.922	2.80851	11.7222	11.7909	2.46733
16.776	28	4	7	32.7872	2.79433	11.7335	11.7707	2.46562
16.8	24	2		32.6224	2.76923	11.7803	11.7588	2.4646
16.824	26	2		32.3007	2.75524	11.7234	11.7678	2.46537
16.848	19	2		32.0629	2.75524	11.6371	11.7778	2.46622
16.872	41	6		31.8741	2.72727	11.6872	11.7903	2.46728
16.896	26	3		31.6783	2.69231	11.7662	11.8022	2.46829
16.92	22	1		31.4056	2.64336	11.881	11.8091	2.46887
16.944	40	1		31.1818	2.60839	11.9544	11.8123	2.46914
16.968	25	3		31.014	2.6014	11.922	11.8234	2.47008
16.992	21	2		30.6713	2.58042	11.8862	11.85	2.47233
17.016	32	2		30.4196	2.56643	11.8529	11.8771	2.47461
17.04	22	5
17.064	31	5
17.088	31	3
17.112	27	1
17.136	33	2
17.16	40	1
17.184	23	2
17.208	28	0
17.232	29	3
17.256	33	3
17.28	23	3
17.304	23	4
17.328	26	3
17.352	22	1
17.376	30	0
17.4	29	2
17.424	25	1
17.448	27	5
17.472	30	2
17.496	21	1
17.52	23	2
17.544	19	6
17.568	26	0
17.592	20	1
17.616	21	5
17.64	25	0
17.664	24	2
17.688	22	0
17.712	26	1
17.736	24	3
17.76	28	2
17.784	22	1
17.808	20	5
17.832	22	2
17.856	19	1
17.88	29	1
17.904	24	1
17.928	25	1
17.952	28	5
17.976	26	2
18	19	0
18.024	31	1
18.048	17	2
18.072	22	1
18.096	19	1
18.12	23	2
18.144	26	4
18.168	23	2
18.192	23	2
18.216	12	4
18.24	26	1
18.264	22	0
18.288	17	1
18.312	28	2
18.336	19	1
18.36	17	2
18.384	19	6
18.408	17	1
18.432	14	2
18.456	15	1
18.48	20	1
18.504	22	1
18.528	11	1
18.552	10	2
18.576	20	2
18.6	22	1
18.624	20	0
18.648	27	1
18.672	23	4
18.696	16	1
18.72	17	1
18.744	25	2
18.768	20	2
18.792	15	3
18.816	16	1
18.84	12	3
18.864	20	1
18.888	17	2
18.912	16	2
18.936	16	6
18.96	14	2
18.984	24	3
19.008	10	2
19.032	12	0
19.056	18	2
19.08	14	0
19.104	10	1
19.128	14	0
19.152	22	2
19.176	11	0
19.2	16	4
19.224	16	1
19.248	15	0
19.272	15	0
19.296	11	1
19.32	17	2
19.344	16	1
19.368	14	1
19.392	15	3
19.416	12	2
19.44	19	0
19.464	15	0
19.488	16	0
19.512	16	2
19.536	14	0
19.56	12	0
19.584	13	1
19.608	18	0
19.632	15	1
19.656	9	0
19.68	12	2
19.704	7	1
19.728	22	2
19.752	12	4
19.776	16	2
19.8	10	2
19.824	13	1
19.848	10	0
19.872	13	2
19.896	11	0
19.92	13	1
19.944	13	0
19.968	21	0
19.992	14	0
20.016	10	1
