# Supplementary material for: Tropospheric temperature retrievals using nonlinear calibration functions in the pure rotational Raman lidar technique
Source: Copernicus journal article supplement (doi:10.5194/amt-2016-189), 2016-06-13
Supplement: Supplementary file 24 [file 02.10.2014. Temperature profile retrieved using Eqs. (13) and (18).xlsx]

## Sheet: Лист1
z, km
Altitude	Smoothed signals	Smoothed signals	Smoothed ratio
0.048	573	65.5	8.59143	250.322	2.16201	0.0174604	A1	0.075	282.75	0.143	286.15	0.83	277.15			251.318	2.26314	0.0182047
0.072	743	82	8.45197	252.341	1.57632	0.012462	-3.16533	0.182	283.75	0.188	285.55	1.51	274.35			253.407	1.61102	0.0126828
0.096	995.333	113	8.38058	253.381	1.32711	0.0105607		0.199	283.55	0.484	282.75	3.05	266.15	3.048	0.877496	254.462	1.33732	0.0105968	0.333765
0.12	1177.67	135	8.307	254.456	1.20566	0.00958902	B1	0.24	283.25	0.737	280.25	5.61	250.65	5.616	1.45127	255.537	1.19573	0.00946981	0.51545
0.144	1215.67	150.333	8.2572	255.187	1.11661	0.00912232	2156.11	0.647	280.35	0.835	279.35	7.21	238.15	7.2	0.980342	256.257	1.09461	0.00890521	1.19152
0.168	1204.67	148.333	8.21704	255.777	1.12281	0.00913608		0.821	277.75	1.517	273.55	9.14	224.15	9.144	2.96833	256.833	1.08986	0.00883147	1.94155
0.192	1167.67	153.333	8.11769	257.245	1.07892	0.00896137	C1	1.186	273.95	1.555	273.25	12	210.65	12	1.76991	258.24	1.01983	0.00843791	0.605356
0.216	1124.33	142.667	8.00646	258.901	1.12294	0.00913712	-206610	1.341	274.55	2.11	268.65					259.78	1.0265	0.00832423
0.24	1085.2	140.6	7.94315	259.85	0.868475	0.00710133		1.5	275.35	2.702	268.65					260.638	0.777433	0.00633768
0.264	1046.4	134	7.84723	261.296	0.888656	0.00719147		1.548	275.15	3.053	266.65					261.911	0.76843	0.00620394
0.288	1008.2	129	7.81317	261.813	0.904601	0.00730355		1.605	274.75	3.943	262.05					262.355	0.771975	0.00621989
0.312	976.8	127.6	7.78997	262.165	0.903391	0.00734659		2.242	269.65	4.143	262.05					262.654	0.763839	0.00620016
0.336	954.6	121.8	7.79515	262.087	0.930973	0.0075		2.449	270.05	4.257	262.05					262.588	0.788803	0.00634254
0.36	928	114.4	7.78307	262.27	0.969231	0.00769475		2.661	268.55	5.195	255.85					262.743	0.817218	0.00647625
0.384	901.8	117.6	7.76429	262.557	0.940479	0.00763134		2.879	267.05	5.59	253.25					262.983	0.786876	0.0063746
0.408	888.4	115.2	7.73749	262.966	0.95071	0.00768434		3.046	265.85	5.62	252.65					263.324	0.786501	0.00634844
0.432	870	110.6	7.70801	263.417	0.974529	0.00779956		3.192	264.45	6.572	244.15					263.695	0.795948	0.0063636
0.456	842.4	109.8	7.69118	263.675	0.970629	0.00784098		3.397	264.45	7.03	240.05					263.904	0.786846	0.00635081
0.48	834.571	107.714	7.66519	264.074	0.829711	0.00666528		3.502	263.55	7.22	239.65					264.226	0.664692	0.00533657
0.504	819.857	109.143	7.60088	265.067	0.815129	0.00660833		3.763	261.45	8.3	232.65					265.009	0.633215	0.00513464
0.528	801.857	106.714	7.59068	265.225	0.824126	0.00667643		3.983	262.45	8.402	232.05					265.132	0.636958	0.00516196
0.552	793	105.857	7.59838	265.106	0.826958	0.00671099		4.168	261.15	9.18	225.45					265.039	0.641608	0.00520812
0.576	785.429	105.143	7.5932	265.186	0.828935	0.00673301		5.002	255.25	10.36	215.85					265.102	0.641484	0.0052121
0.6	784.286	103.857	7.61335	264.874	0.837255	0.00677759		5.497	251.45	10.827	211.45					264.859	0.654409	0.00529774
0.624	774.286	104.571	7.61857	264.793	0.829826	0.00677557		5.6	250.65	11.324	210.05					264.796	0.650254	0.0053093
0.648	768.571	101.714	7.63633	264.519	0.846884	0.00686298		5.718	249.65	11.382	209.85					264.58	0.66932	0.00542278
0.672	771.857	99	7.64876	264.327	0.866438	0.0069358		5.763	249.25	11.74	210.45					264.428	0.688815	0.00551183
0.696	777.571	99.5714	7.66158	264.13	0.864752	0.00692287		5.99	248.05	12.161	211.55					264.271	0.691606	0.00553378
0.72	768.333	97.3333	7.6564	264.21	0.773519	0.00616339		6.036	247.65	13.54	215.25					264.335	0.617149	0.00491511
0.744	771	98.7778	7.63705	264.508	0.764897	0.00611593		6.903	240.35	13.753	216.05					264.571	0.604729	0.00483411
0.768	775	100.556	7.63752	264.501	0.755434	0.00607205		7.2	237.85	15.715	214.55					264.566	0.597382	0.00480048
0.792	781.222	102.111	7.62574	264.682	0.74778	0.00602476		8.398	227.85	16.08	214.25					264.709	0.588001	0.00473697
0.816	798	104.556	7.60098	265.065	0.737824	0.00594191		9.12	222.85							265.008	0.573191	0.00461707
0.84	819.556	110.556	7.59542	265.151	0.711408	0.00579794		10.149	215.05							265.075	0.551145	0.0044931
0.864	852.111	116.111	7.58929	265.246	0.691995	0.00566196		10.3	214.45							265.148	0.534465	0.00437465
0.888	892.444	120.444	7.60136	265.059	0.681629	0.00555828		11.123	209.25							265.004	0.529636	0.00431978
0.912	955.556	128.667	7.6145	264.856	0.66024	0.00538276		11.179	209.05							264.845	0.516342	0.00420977
0.936	1040	138.222	7.64123	264.443	0.640034	0.00519746		11.589	209.35							264.52	0.50702	0.00411611
0.96	1185.45	153	7.67286	263.956	0.555517	0.00446459		11.68	209.45							264.132	0.446605	0.0035869
0.984	1307.73	167.091	7.72722	263.123	0.534198	0.00428906		11.899	209.05							263.453	0.439984	0.00352819
1.008	1458.45	183.727	7.80198	261.983	0.513003	0.00411297		12.061	210.15							262.499	0.435853	0.00348755
1.032	1631.73	207.818	7.87218	260.919	0.482357	0.0039004		12.469	212.75							261.583	0.421018	0.00339575
1.056	1817.18	228.727	7.94085	259.885	0.462726	0.00373857		12.576	213.45							260.669	0.413892	0.00333395
1.08	2019.73	253.091	7.99554	259.065	0.44158	0.00357255		13.47	214.25							259.929	0.402245	0.00324349
1.104	2254	281.364	8.02276	258.658	0.419809	0.00339647		14.322	217.05							259.557	0.385745	0.00311007
1.128	2522.55	309.091	8.04175	258.374	0.402942	0.00323935		15.201	216.75							259.295	0.372438	0.00298349
1.152	2812.27	343.727	8.04945	258.26	0.382508	0.00307337		16.03	216.45							259.189	0.354387	0.0028372
1.176	3118.09	381.091	8.06217	258.07	0.363512	0.00292283										259.013	0.338086	0.00270849
1.2	3465.31	426.462	8.06852	257.976	0.31561	0.00254561										258.925	0.294093	0.00236336
1.224	3794.08	471.462	8.06644	258.007	0.299352	0.00242358										258.954	0.27877	0.00224869
1.248	4127.69	513.692	8.06082	258.09	0.286583	0.00232086										259.032	0.266429	0.0021498
1.272	4477.38	558.077	8.03633	258.455	0.274494	0.00222121										259.37	0.253291	0.00204241
1.296	4813.38	602.308	8.00463	258.929	0.263526	0.00213193										259.805	0.240756	0.00194114
1.32	5162.62	644.154	7.97032	259.442	0.2546	0.00205325										260.271	0.23001	0.00184903
1.344	5532.23	695.231	7.93733	259.937	0.244209	0.0019714										260.716	0.218172	0.00175595
1.368	5917.23	744.385	7.90261	260.46	0.235564	0.0018986										261.18	0.207898	0.00167099
1.392	6292.23	797.308	7.8627	261.062	0.226753	0.00182874										261.708	0.197222	0.00158665
1.416	6655.62	849.692	7.81939	261.718	0.218786	0.00176545										262.274	0.187165	0.0015071
1.44	6988.73	895.467	7.77674	262.367	0.19785	0.00159494										262.824	0.166388	0.00133898
1.464	7337.4	945.2	7.72794	263.112	0.191907	0.00154606										263.444	0.15811	0.00127217
1.488	7669.73	1000.53	7.67931	263.857	0.185514	0.00149812										264.052	0.149583	0.00120707
1.512	8015.13	1055.13	7.62836	264.642	0.179843	0.00145351										264.677	0.141595	0.00114423
1.536	8346.33	1106	7.57969	265.395	0.175024	0.00141444										265.263	0.134528	0.00108772
1.56	8686.87	1154.8	7.5365	266.066	0.170876	0.00137928										265.773	0.128426	0.00103778
1.584	9007.73	1204.6	7.49374	266.734	0.166785	0.00134626										266.269	0.122467	0.000990257
1.608	9319.67	1255.6	7.45458	267.348	0.162809	0.00131528										266.715	0.116909	0.000946709
1.632	9642.33	1305	7.42306	267.843	0.159332	0.00128729										267.068	0.112294	0.000909896
1.656	9957.27	1353.53	7.39608	268.269	0.156124	0.00126172										267.365	0.108229	0.000877611
1.68	10249.9	1393.06	7.3723	268.646	0.144465	0.00116577										267.624	0.0986547	0.00079914
1.704	10534.1	1436.29	7.34898	269.015	0.142046	0.00114625										267.875	0.0955471	0.000774308
1.728	10808.7	1474.18	7.32743	269.358	0.140112	0.00112935										268.104	0.0929048	0.000752347
1.752	11076.6	1513.41	7.31191	269.605	0.138153	0.00111339										268.267	0.0906439	0.000734152
1.776	11340.5	1553.59	7.29939	269.805	0.136203	0.00109811										268.397	0.0885936	0.000718015
1.8	11591.8	1591.24	7.28651	270.011	0.134456	0.00108414										268.531	0.08667	0.000702685
1.824	11843.9	1630.06	7.27253	270.235	0.132695	0.00107025										268.674	0.0846861	0.000687
1.848	12066.1	1666.41	7.26044	270.428	0.131065	0.00105792										268.797	0.0829162	0.00067334
1.872	12279.4	1693.29	7.24654	270.651	0.130032	0.00104804										268.938	0.0814256	0.000660456
1.896	12463.6	1718.88	7.23295	270.87	0.129013	0.00103903										269.074	0.0799695	0.000648348
1.92	12597.4	1746.05	7.22249	271.038	0.12087	0.000974948										269.178	0.0743295	0.000603691
1.944	12763.7	1771.74	7.21348	271.184	0.119912	0.000967319										269.267	0.0732305	0.00059495
1.968	12898.6	1791.16	7.20491	271.322	0.119221	0.000961422										269.351	0.072326	0.000587518
1.992	13030.4	1815.05	7.19718	271.446	0.118303	0.000954856										269.426	0.0713349	0.000580079
2.016	13146.2	1833.63	7.18733	271.606	0.117628	0.0009494										269.522	0.0703748	0.000572402
2.04	13264.1	1846.21	7.17884	271.743	0.117276	0.000945224										269.604	0.0696878	0.000566128
2.064	13352.4	1858.21	7.17255	271.845	0.116885	0.000941657										269.664	0.0691025	0.00056121
2.088	13425.9	1872.05	7.16648	271.943	0.116369	0.000937943										269.722	0.0684567	0.00055631
2.112	13469.7	1882.37	7.15994	272.049	0.115955	0.000935149										269.784	0.0678467	0.000551762
2.136	13524.2	1893.26	7.15648	272.105	0.115552	0.000932408										269.817	0.0674172	0.000548616
2.16	13515.3	1888.24	7.1538	272.149	0.110117	0.000887639										269.843	0.0641033	0.000521147
2.184	13544.4	1895.48	7.15064	272.2	0.109844	0.000885914										269.872	0.0637758	0.000518804
2.208	13546.8	1898.05	7.14904	272.226	0.109726	0.000885339										269.888	0.0636222	0.000517791
2.232	13537.6	1898.86	7.14829	272.238	0.109665	0.000885229										269.895	0.0635467	0.000517412
2.256	13535	1895.38	7.15136	272.189	0.109827	0.000886067										269.866	0.0638045	0.000519197
2.28	13516.4	1893.05	7.15745	272.09	0.109905	0.000887075										269.808	0.0641746	0.000522352
2.304	13486.1	1886.24	7.16354	271.991	0.110163	0.000888956										269.75	0.0646499	0.000526022
2.328	13454.2	1877	7.17178	271.857	0.110539	0.000891441										269.672	0.0653097	0.000530958
2.352	13417	1872.95	7.1809	271.71	0.110662	0.000893153										269.584	0.0658666	0.000535803
2.376	13357.1	1857.86	7.19185	271.533	0.111259	0.000897149										269.478	0.0668043	0.000542792
2.4	13271.4	1840.61	7.20453	271.328	0.106933	0.000861837										269.355	0.0648514	0.000526507
2.424	13195.2	1826.43	7.21535	271.153	0.107438	0.000865727										269.248	0.0657077	0.000533214
2.448	13115.4	1812.43	7.22483	271.001	0.107929	0.000869564										269.155	0.0664898	0.00053937
2.472	13040.4	1801.78	7.2336	270.859	0.108276	0.000872756										269.067	0.0671491	0.000544856
2.496	12946.2	1785.74	7.24314	270.706	0.108842	0.000877173										268.972	0.0679842	0.000551427
2.52	12865	1767.04	7.25056	270.587	0.109573	0.00088185										268.897	0.0688189	0.000557336
2.544	12755.1	1757.13	7.25733	270.478	0.109806	0.000885195										268.829	0.0693091	0.000562162
2.568	12648.6	1743.65	7.26287	270.389	0.110222	0.000889111										268.773	0.069854	0.000566868
2.592	12533.1	1725.26	7.26809	270.306	0.11087	0.000894061										268.72	0.0705313	0.000572124
2.616	12423.7	1709.26	7.27497	270.196	0.111426	0.000898696										268.649	0.0712366	0.000577861
2.64	12276	1688.32	7.2824	270.077	0.107569	0.000867836										268.573	0.0691369	0.000560899
2.664	12140.9	1666.6	7.28902	269.971	0.108347	0.000873745										268.505	0.069964	0.000567293
2.688	12015.2	1649.2	7.29726	269.839	0.108944	0.000878953										268.42	0.0707576	0.000573889
2.712	11874.9	1628.08	7.3064	269.693	0.109712	0.000885195										268.324	0.0717103	0.000581537
2.736	11733.8	1604.48	7.31615	269.538	0.110631	0.000892112										268.223	0.0727968	0.000589901
2.76	11600.5	1582.28	7.32757	269.356	0.111521	0.000898932										268.102	0.0739532	0.000598898
2.784	11458	1558.2	7.33837	269.184	0.112511	0.000906338										267.988	0.0751511	0.000608086
2.808	11312.2	1539.12	7.3513	268.979	0.113231	0.000913026										267.85	0.0762809	0.000617673
2.832	11159	1517.28	7.36373	268.781	0.114105	0.000920491										267.717	0.077494	0.000627632
2.856	11014.4	1494.16	7.37587	268.589	0.115103	0.000928285										267.586	0.0787828	0.000637753
2.88	10872.8	1470.48	7.3875	268.405	0.111782	0.000900961										267.459	0.0770753	0.00062342
2.904	10724.4	1451.22	7.39907	268.222	0.112542	0.000907915										267.333	0.078161	0.000632652
2.928	10578.1	1424.26	7.40919	268.062	0.113802	0.000916674										267.221	0.0795313	0.000642641
2.952	10440.3	1406.63	7.42082	267.879	0.114531	0.000923437										267.093	0.08061	0.000651853
2.976	10296.6	1386.3	7.43357	267.678	0.115436	0.000931155										266.951	0.0818715	0.000662209
3	10153	1364.44	7.44676	267.471	0.116466	0.00093946										266.803	0.0832498	0.000673203
3.024	10016.4	1342.93	7.45958	267.269	0.117523	0.000947749										266.659	0.0846353	0.000684095
3.048	9875.26	1322.93	7.47499	267.027	0.118493	0.000956113										266.484	0.0860927	0.000696094
3.072	9736.26	1302.04	7.48991	266.794	0.119557	0.000964833										266.313	0.0876005	0.000708217
3.096	9599.19	1280.78	7.50701	266.527	0.120692	0.000974027										266.116	0.0892743	0.000721588
3.12	9481.24	1261.34	7.52657	266.221	0.117524	0.000948381										265.889	0.0878603	0.00070989
3.144	9340.55	1239.62	7.54798	265.888	0.118717	0.000958236										265.639	0.0897676	0.000725246
3.168	9204.55	1217.62	7.56911	265.559	0.119983	0.000968334										265.389	0.0917254	0.000740753
3.192	9076.72	1195.69	7.59172	265.209	0.121319	0.000978695										265.119	0.0938157	0.000757075
3.216	8948.07	1175.79	7.61521	264.845	0.122532	0.000988795										264.837	0.095859	0.00077358
3.24	8828.24	1155.14	7.63886	264.48	0.123878	0.000999272										264.549	0.0980228	0.000790502
3.264	8710.79	1134.72	7.66236	264.118	0.125254	0.00100989										264.261	0.100211	0.000807536
3.288	8587.03	1116.48	7.68479	263.773	0.126448	0.00102005										263.984	0.102211	0.000823871
3.312	8472.28	1098.38	7.70588	263.449	0.127693	0.00103013										263.721	0.104196	0.000839705
3.336	8351.72	1079.59	7.72287	263.189	0.128992	0.00104037										263.508	0.106042	0.00085424
3.36	8244.1	1063.06	7.73931	262.938	0.125896	0.00101535										263.301	0.104232	0.00083947
3.384	8131.87	1045.87	7.75387	262.716	0.127093	0.00102477										263.116	0.105874	0.000852379
3.408	8021	1030.74	7.76579	262.534	0.128115	0.00103337										262.964	0.107257	0.000863712
3.432	7913.13	1015.61	7.77521	262.39	0.129161	0.00104184										262.844	0.108554	0.000874107
3.456	7807.42	1003.77	7.78347	262.264	0.129902	0.00104906										262.738	0.109546	0.000883076
3.48	7694.32	987.581	7.79114	262.148	0.131065	0.0010582										262.639	0.110871	0.000893481
3.504	7588.29	972.516	7.79805	262.043	0.13217	0.00106689										262.55	0.112117	0.00090327
3.528	7481.48	958.226	7.80264	261.973	0.133201	0.00107522										262.491	0.113198	0.000911954
3.552	7372.9	945.871	7.80927	261.872	0.134044	0.00108318										262.405	0.114215	0.00092107
3.576	7267.29	931.194	7.81525	261.781	0.135176	0.00109216										262.328	0.115452	0.000930856
3.6	7176.76	917.697	7.82452	261.641	0.132104	0.00106701										262.207	0.113238	0.000912652
3.624	7082.39	904.394	7.83501	261.482	0.133183	0.00107577										262.071	0.114627	0.000923811
3.648	6981.64	892.152	7.84654	261.307	0.134134	0.00108449										261.92	0.115957	0.00093533
3.672	6884.58	876.485	7.85821	261.13	0.135537	0.0010949										261.767	0.117687	0.000948396
3.696	6788.21	863.939	7.87311	260.905	0.136619	0.00110446										261.571	0.119287	0.000961888
3.72	6694.94	849.606	7.88771	260.685	0.137967	0.00111498										261.378	0.121111	0.000976158
3.744	6602.36	835.061	7.9002	260.496	0.139371	0.0011256										261.212	0.122896	0.000989826
3.768	6515.45	821.667	7.91245	260.312	0.140694	0.00113574										261.049	0.124605	0.00100303
3.792	6420.21	809	7.92397	260.138	0.141898	0.00114585										260.895	0.126182	0.00101599
3.816	6333.27	795.758	7.93295	260.003	0.143246	0.00115599										260.775	0.12778	0.00102813
3.84	6251.94	784.943	7.94155	259.874	0.140133	0.00113109										260.66	0.125374	0.00100891
3.864	6160	774.086	7.94764	259.783	0.141119	0.00113985										260.578	0.126519	0.00101881
3.888	6071.34	762.171	7.95139	259.726	0.142282	0.00114902										260.527	0.127725	0.0010283
3.912	5988.37	753.029	7.95346	259.695	0.143091	0.00115648										260.499	0.128541	0.00103568
3.936	5906.91	742.686	7.95487	259.674	0.144098	0.00116466										260.48	0.129508	0.0010435
3.96	5823.94	732.4	7.95549	259.665	0.145103	0.00117292										260.472	0.130438	0.00105111
3.984	5741.86	722.514	7.95536	259.667	0.146067	0.00118099										260.474	0.131299	0.0010583
4.008	5657.2	711.8	7.95689	259.644	0.147177	0.00119002										260.453	0.132365	0.00106694
4.032	5579.34	701.6	7.95617	259.654	0.148261	0.00119846										260.463	0.133308	0.00107425
4.056	5501.97	691.943	7.95628	259.653	0.149288	0.00120683										260.461	0.134237	0.00108179
4.08	5432.78	682.027	7.95673	259.646	0.146324	0.00118204										260.455	0.131591	0.00105973
4.104	5355.3	672.486	7.95664	259.647	0.147346	0.00119043										260.456	0.132506	0.00106721
4.128	5287.14	663	7.95821	259.624	0.148465	0.00119889										260.435	0.133583	0.00107536
4.152	5212.03	654.946	7.96395	259.538	0.14933	0.0012073										260.358	0.134621	0.00108495
4.176	5140.84	646.351	7.97116	259.43	0.150349	0.00121631										260.26	0.135866	0.00109564
4.2	5069.51	637	7.97678	259.345	0.151514	0.00122584										260.184	0.137174	0.00110624
4.224	4998.05	628.622	7.98297	259.253	0.152526	0.00123494										260.1	0.138371	0.00111669
4.248	4924.11	618.27	7.98933	259.158	0.153916	0.0012458										260.013	0.139923	0.00112881
4.272	4858.49	606.486	7.99731	259.038	0.155713	0.00125796										259.905	0.141924	0.00114273
4.296	4796.84	597.243	8.00726	258.889	0.157101	0.00126857										259.769	0.143646	0.001156
4.32	4737.69	591.231	8.0202	258.696	0.153798	0.00124398										259.592	0.141205	0.00113818
4.344	4678.33	582.333	8.03196	258.52	0.155167	0.00125461										259.43	0.142987	0.00115207
4.368	4616.08	574.615	8.04528	258.322	0.156308	0.00126483										259.247	0.144631	0.00116617
4.392	4556.69	565.179	8.05919	258.115	0.157873	0.00127667										259.055	0.146699	0.00118201
4.416	4498.9	557.667	8.06854	257.975	0.159036	0.00128645										258.925	0.148195	0.00119436
4.44	4439.31	548.333	8.07763	257.84	0.160613	0.00129804										258.799	0.150069	0.00120833
4.464	4380.46	541.615	8.08983	257.659	0.161664	0.00130798										258.629	0.151592	0.0012219
4.488	4318.38	533.308	8.09798	257.538	0.16304	0.00131911										258.516	0.153245	0.00123517
4.512	4264.74	525.385	8.10577	257.422	0.164442	0.00132973										258.407	0.154909	0.00124788
4.536	4205.62	518.333	8.11186	257.332	0.16559	0.00133973										258.322	0.156261	0.00125941
4.56	4154.27	510.878	8.11885	257.228	0.162832	0.00131678										258.224	0.153963	0.00124027
4.584	4099.34	503.146	8.12319	257.164	0.164202	0.00132717										258.163	0.155449	0.00125156
4.608	4040.54	497.39	8.12924	257.074	0.165072	0.00133623										258.078	0.156537	0.00126222
4.632	3983.66	490.659	8.13433	256.999	0.166221	0.00134623										258.006	0.15785	0.00127344
4.656	3929.83	483.415	8.14038	256.909	0.167573	0.00135697										257.921	0.159401	0.00128572
4.68	3880.63	476.488	8.14835	256.791	0.168944	0.00136769										257.809	0.161056	0.00129868
4.704	3832.37	470.585	8.15564	256.683	0.170065	0.00137737										257.706	0.162446	0.00131044
4.728	3781.41	463.732	8.16324	256.571	0.171448	0.00138846										257.598	0.164103	0.00132368
4.752	3734.41	458.024	8.17689	256.369	0.172637	0.00139926										257.405	0.165842	0.00133878
4.776	3686.56	450.463	8.19086	256.163	0.174391	0.0014125										257.207	0.168142	0.00135636
4.8	3644.09	444.326	8.20687	255.927	0.171712	0.00139091										256.979	0.166243	0.0013411
4.824	3599.26	438.302	8.22454	255.667	0.17312	0.00140303										256.726	0.168355	0.00135879
4.848	3549.88	431.279	8.24327	255.391	0.174822	0.00141704										256.457	0.170799	0.00137868
4.872	3506.44	423.814	8.2635	255.094	0.176806	0.00143187										256.166	0.173584	0.00139989
4.896	3459.53	418.186	8.2852	254.776	0.178216	0.00144515										255.853	0.175865	0.00142008
4.92	3417.79	411.512	8.30374	254.504	0.180044	0.00145925										255.584	0.178429	0.00144005
4.944	3372.84	404.488	8.32219	254.234	0.181996	0.00147433										255.316	0.181113	0.00146096
4.968	3330.23	398.837	8.34197	253.944	0.18357	0.00148798										255.027	0.183476	0.0014809
4.992	3288.21	392.535	8.35907	253.695	0.185394	0.00150233										254.777	0.185979	0.00150068
5.016	3246.74	386.884	8.3739	253.478	0.187007	0.00151562										254.56	0.188184	0.00151868
5.04	3208.44	382.511	8.38933	253.253	0.184002	0.00149289										254.333	0.185752	0.00150069
5.064	3169.38	377.111	8.40142	253.077	0.185555	0.00150537										254.155	0.187779	0.00151696
5.088	3131.82	371.533	8.41225	252.919	0.18722	0.00151806										253.995	0.189875	0.00153307
5.112	3090	367.022	8.42359	252.754	0.188445	0.00152973										253.828	0.191546	0.00154832
5.136	3050.69	361.6	8.43271	252.621	0.190071	0.00154248										253.692	0.193541	0.00156401
5.16	3014.16	357.022	8.43868	252.535	0.191395	0.00155334										253.604	0.195114	0.00157685
5.184	2979.13	353.044	8.44634	252.423	0.192544	0.00156365										253.491	0.196573	0.00158964
5.208	2941.96	347.844	8.45753	252.261	0.194239	0.00157702										253.324	0.198722	0.00160665
5.232	2908.29	343.178	8.46724	252.12	0.195785	0.00158923										253.18	0.200665	0.00162202
5.256	2871.71	338.756	8.47821	251.961	0.197221	0.0016017										253.017	0.202545	0.00163807
5.28	2838.89	335.66	8.4893	251.8	0.193896	0.00157712										252.851	0.199529	0.0016162
5.304	2803.55	330.915	8.4998	251.648	0.195509	0.00159015										252.695	0.201566	0.00163262
5.328	2770.89	324.936	8.5147	251.432	0.197839	0.00160641										252.472	0.204501	0.00165366
5.352	2736.85	320.617	8.52746	251.247	0.199397	0.00161961										252.28	0.206564	0.00167094
5.376	2700.57	316.234	8.53849	251.087	0.200952	0.00163301										252.115	0.208562	0.00168794
5.4	2667.55	311.681	8.55196	250.892	0.202724	0.00164728										251.913	0.210872	0.00170655
5.424	2634.21	307.809	8.56977	250.635	0.204251	0.00166144										251.645	0.213076	0.00172627
5.448	2602.13	302.489	8.58638	250.395	0.206564	0.00167851										251.394	0.216056	0.00174866
5.472	2567.51	298.617	8.59841	250.222	0.208055	0.00169212										251.212	0.218021	0.00176619
5.496	2536.34	295.064	8.60955	250.061	0.209462	0.00170482										251.044	0.219868	0.00178252
5.52	2509.65	290.959	8.62132	249.891	0.206949	0.00168328										250.865	0.217614	0.00176316
5.544	2480.02	286.592	8.632	249.737	0.208861	0.00169776										250.703	0.219969	0.00178117
5.568	2449.35	283	8.6469	249.523	0.210427	0.00171185										250.477	0.222096	0.0017999
5.592	2418.73	279.306	8.65807	249.362	0.212024	0.00172559										250.307	0.224135	0.00181727
5.616	2390.51	276.082	8.66941	249.199	0.213437	0.00173831										250.135	0.225985	0.00183362
5.64	2363.9	272.673	8.68072	249.036	0.215022	0.00175153										249.962	0.228014	0.00185049
5.664	2336.69	269.327	8.69124	248.885	0.216574	0.00176472										249.802	0.229983	0.00186711
5.688	2312.37	265.122	8.7022	248.727	0.218766	0.00178012										249.634	0.232647	0.0018862
5.712	2287.24	262.143	8.71209	248.585	0.220199	0.00179254										249.483	0.234471	0.00190185
5.736	2260.45	259.143	8.72624	248.382	0.221703	0.00180645										249.267	0.236496	0.00192015
5.76	2236.84	256.51	8.74274	248.145	0.218698	0.00178386										249.014	0.233766	0.00190012
5.784	2211.84	253.039	8.75984	247.9	0.220632	0.00179978										248.751	0.236317	0.00192113
5.808	2185.43	249.078	8.77746	247.647	0.222914	0.00181764										248.48	0.239251	0.00194431
5.832	2158.63	246.314	8.78934	247.477	0.224314	0.00183114										248.298	0.241078	0.00196148
5.856	2132.65	241.922	8.80216	247.294	0.226923	0.00184966										248.1	0.244227	0.00198424
5.88	2109.86	238.667	8.81496	247.11	0.228873	0.00186495										247.903	0.246667	0.00200352
5.904	2085.14	235.412	8.82717	246.936	0.230802	0.00188062										247.714	0.249066	0.00202305
5.928	2059.92	232.235	8.83967	246.757	0.232706	0.00189649										247.521	0.251443	0.00204286
5.952	2034.86	229.863	8.84707	246.651	0.233936	0.00190875										247.407	0.252961	0.00205767
5.976	2012.98	227.039	8.85634	246.518	0.235667	0.00192278										247.263	0.255066	0.00207479
6	1993.13	224.868	8.86	246.466	0.232348	0.00189632										247.207	0.251563	0.002047
6.024	1968.57	222.321	8.862	246.437	0.233656	0.00190794										247.176	0.253029	0.00205997
6.048	1946.42	219.226	8.86184	246.44	0.235456	0.00192067										247.178	0.254975	0.00207367
6.072	1922.81	217.132	8.86272	246.427	0.236452	0.00193078										247.165	0.256075	0.00208478
6.096	1901.94	214.528	8.86781	246.354	0.238057	0.00194362										247.086	0.25794	0.00209971
6.12	1878.58	212.132	8.87181	246.297	0.239413	0.00195598										247.024	0.259508	0.00211392
6.144	1858.23	209.679	8.8758	246.24	0.240939	0.00196835										246.962	0.26126	0.00212813
6.168	1835.79	207.302	8.88265	246.142	0.242416	0.00198177										246.856	0.263031	0.00214408
6.192	1814.79	204.377	8.89	246.037	0.24447	0.00199737										246.742	0.265438	0.00216249
6.216	1794.98	201.491	8.90511	245.821	0.246748	0.00201527										246.507	0.268276	0.002185
6.24	1776.55	199.382	8.92274	245.57	0.243896	0.00199387										246.233	0.265579	0.00216528
6.264	1755.58	197.091	8.942	245.295	0.24572	0.00201127										245.934	0.267993	0.00218788
6.288	1735.65	194.364	8.9601	245.036	0.248008	0.00203021										245.652	0.270875	0.00221185
6.312	1716.45	191.582	8.97806	244.78	0.250427	0.00204962										245.372	0.273889	0.00223624
6.336	1699.36	188.364	8.99393	244.554	0.253374	0.00207026										245.124	0.27743	0.00226154
6.36	1679.98	185.436	9.00903	244.339	0.256	0.00209028										244.889	0.280599	0.00228599
6.384	1660.04	183.073	9.02666	244.088	0.25814	0.00210923										244.613	0.283275	0.00230963
6.408	1641.75	181.182	9.05053	243.747	0.260043	0.00212829										244.24	0.285786	0.00233427
6.432	1623	179.273	9.07385	243.415	0.261969	0.0021477										243.874	0.288291	0.00235904
6.456	1605.55	177.327	9.09642	243.094	0.264006	0.00216718										243.52	0.290882	0.00238362
6.48	1590.75	175.298	9.11539	242.824	0.261479	0.00214702										243.223	0.288368	0.00236392
6.504	1572.63	172.737	9.13114	242.6	0.264051	0.0021675										242.975	0.291416	0.00238843
6.528	1557.3	169.825	9.14817	242.357	0.267253	0.00219011										242.708	0.295165	0.00241536
6.552	1538.98	167.526	9.16801	242.075	0.269761	0.00221177										242.396	0.29817	0.00244146
6.576	1522.33	165.333	9.18689	241.806	0.272245	0.00223272										242.099	0.301119	0.00246654
6.6	1504.23	162.965	9.20633	241.529	0.274958	0.0022555										241.792	0.304312	0.00249357
6.624	1487.14	161.07	9.2271	241.234	0.277217	0.00227659										241.465	0.306995	0.00251871
6.648	1471.21	158.965	9.24594	240.966	0.279794	0.00229828										241.168	0.309994	0.00254421
6.672	1455.91	156.895	9.2575	240.801	0.282181	0.0023172										240.986	0.312719	0.00256601
6.696	1439.67	155.456	9.26697	240.666	0.283647	0.00233227										240.837	0.314404	0.00258334
6.72	1425.54	153.814	9.27475	240.556	0.280582	0.00230748										240.714	0.311052	0.00255638
6.744	1410.75	151.644	9.28109	240.466	0.283046	0.00232539										240.614	0.313818	0.00257662
6.768	1394.36	149.746	9.28985	240.341	0.285183	0.00234339										240.475	0.316232	0.00259706
6.792	1378.19	148.237	9.29854	240.217	0.28681	0.0023593										240.338	0.318075	0.00261517
6.816	1363.37	146.746	9.30417	240.137	0.288402	0.00237379										240.25	0.319865	0.00263152
6.84	1348.78	145.136	9.31432	239.992	0.290359	0.0023911										240.089	0.322073	0.0026512
6.864	1333.69	143.407	9.3255	239.833	0.292539	0.00241										239.912	0.324526	0.00267263
6.888	1321.44	141.644	9.33483	239.7	0.294902	0.00242802										239.765	0.327172	0.00269298
6.912	1306.22	139.695	9.34359	239.576	0.297425	0.00244802										239.627	0.329988	0.00271546
6.936	1290.69	138.169	9.35567	239.404	0.299423	0.00246712										239.436	0.332222	0.002737
6.96	1279.44	136.508	9.37148	239.178	0.297065	0.00244701										239.186	0.329615	0.00271504
6.984	1265.48	134.754	9.38603	238.971	0.299664	0.00246879										238.956	0.332493	0.00273943
7.008	1251.41	133.049	9.40294	238.73	0.302319	0.00249177										238.689	0.335417	0.00276504
7.032	1238.28	131.623	9.4169	238.531	0.304497	0.0025116										238.468	0.337801	0.00278704
7.056	1224.98	129.902	9.43057	238.336	0.30721	0.00253386										238.251	0.340767	0.00281164
7.08	1211.31	127.984	9.44745	238.095	0.310439	0.00255968										237.984	0.344278	0.00284002
7.104	1198.41	126.77	9.46206	237.887	0.312416	0.00257935										237.753	0.346395	0.00286149
7.128	1184.82	124.902	9.47603	237.687	0.315575	0.00260435										237.532	0.349811	0.00288878
7.152	1172.15	123.607	9.48756	237.523	0.317676	0.00262382										237.35	0.352059	0.00290993
7.176	1159.43	122.033	9.50029	237.341	0.3204	0.00264652										237.148	0.354978	0.00293452
7.2	1149.29	120.635	9.51228	237.17	0.317808	0.0026244										236.958	0.352003	0.00290937
7.224	1137.81	119.349	9.5213	237.041	0.319952	0.0026429										236.816	0.354294	0.00292935
7.248	1124.14	117.778	9.53366	236.864	0.322707	0.00266651										236.62	0.357218	0.00295472
7.272	1113.17	116.778	9.54504	236.701	0.324487	0.0026843										236.44	0.359064	0.00297362
7.296	1101.63	115.381	9.55994	236.488	0.327238	0.00270792										236.204	0.36193	0.0029986
7.32	1090.52	114.048	9.57536	236.267	0.329965	0.00273158										235.96	0.364745	0.00302343
7.344	1078.13	112.73	9.59012	236.056	0.332588	0.00275557										235.727	0.367435	0.00304854
7.368	1065.79	111.143	9.60866	235.79	0.336049	0.00278469										235.433	0.370972	0.00307874
7.392	1055.1	109.778	9.62369	235.575	0.339044	0.00280978										235.195	0.374025	0.00310468
7.416	1044.3	108.254	9.64195	235.313	0.342627	0.00283886										234.906	0.377647	0.00313443
7.44	1034.6	106.985	9.66068	235.044	0.340442	0.00282149										234.61	0.374877	0.00311262
7.464	1023.34	105.615	9.67984	234.768	0.343777	0.00285049										234.307	0.37815	0.00314168
7.488	1012.25	103.954	9.69923	234.49	0.347935	0.00288328										234	0.382289	0.00317459
7.512	1001.62	103.154	9.71638	234.243	0.349964	0.00290609										233.729	0.384108	0.00319664
7.536	991.6	101.877	9.73565	233.965	0.353403	0.00293561										233.424	0.387392	0.0032254
7.56	980.631	100.538	9.75203	233.729	0.356839	0.00296492										233.166	0.390716	0.00325424
7.584	970.662	99.3231	9.76664	233.518	0.360013	0.00299192										232.935	0.393776	0.0032807
7.608	961.462	98.3385	9.78117	233.308	0.362692	0.00301643										232.705	0.396274	0.00330426
7.632	951.631	97.3231	9.79126	233.162	0.365184	0.00303894										232.546	0.398685	0.00332651
7.656	942.723	95.9692	9.80421	232.974	0.368926	0.00306753										232.341	0.402356	0.0033546
7.68	934.582	95.1045	9.81398	232.833	0.365646	0.00304169										232.187	0.398459	0.00332387
7.704	924.582	94.0448	9.82087	232.733	0.368158	0.00306342										232.078	0.400966	0.00334582
7.728	915.97	93	9.83071	232.59	0.370985	0.00308684										231.923	0.403706	0.00336877
7.752	907.09	92.1045	9.84321	232.409	0.373562	0.00311078										231.726	0.406065	0.00339142
7.776	897.448	91.0896	9.85713	232.207	0.37656	0.00313804										231.506	0.408811	0.00341711
7.8	886.985	90.1343	9.86284	232.124	0.378815	0.00315928										231.416	0.411042	0.00343854
7.824	877.478	89.2687	9.86945	232.028	0.380978	0.00317991										231.312	0.413135	0.00345899
7.848	868.94	87.9403	9.87721	231.915	0.384828	0.00320768										231.19	0.417003	0.00348677
7.872	860.194	86.7612	9.88533	231.797	0.388287	0.00323428										231.062	0.420421	0.00351309
7.896	851.119	85.7015	9.89624	231.638	0.391579	0.00326201										230.89	0.423531	0.00353961
7.92	843.609	85.3333	9.9044	231.519	0.386839	0.00322937										230.761	0.418062	0.00350148
7.944	833.71	84.2174	9.91195	231.409	0.390039	0.00325607										230.643	0.421195	0.00352785
7.968	824.957	83.1884	9.9193	231.302	0.393118	0.00328127										230.527	0.424197	0.00355259
7.992	816.246	82.1304	9.92229	231.258	0.396054	0.00330386										230.48	0.427232	0.00357598
8.016	807.594	81.0145	9.92243	231.256	0.399063	0.00332544										230.477	0.430471	0.00359929
8.04	798.681	80.3333	9.92094	231.278	0.400397	0.00333937										230.501	0.431978	0.0036149
8.064	790.594	79.6667	9.92015	231.29	0.40184	0.00335342										230.513	0.43357	0.00363039
8.088	781.638	78.8696	9.91778	231.324	0.403569	0.00336893										230.551	0.435543	0.00364805
8.112	774.435	78.1159	9.91686	231.338	0.405477	0.00338425										230.565	0.437644	0.00366496
8.136	767.13	77.3623	9.91438	231.374	0.407287	0.00339857										230.604	0.439711	0.00368137
8.16	760.225	76.6761	9.91279	231.397	0.403177	0.00336408										230.629	0.435345	0.00364458
8.184	752.211	76.1549	9.91242	231.402	0.404171	0.00337681										230.635	0.436435	0.00365851
8.208	743.845	75.338	9.91828	231.317	0.406743	0.00340004										230.543	0.438946	0.00368155
8.232	736.014	74.2958	9.92478	231.222	0.410383	0.00342781										230.44	0.442573	0.00370922
8.256	728.817	73.5352	9.93388	231.089	0.413221	0.00345294										230.297	0.445202	0.00373296
8.28	721.662	72.5211	9.9427	230.96	0.417157	0.00348282										230.158	0.449012	0.00376185
8.304	713.859	71.831	9.95265	230.815	0.41979	0.00350864										230.002	0.451352	0.00378576
8.328	707.901	70.8732	9.9659	230.621	0.424147	0.00354174										229.793	0.455355	0.00381602
8.352	701.831	70.3099	9.97901	230.429	0.426822	0.00356784										229.587	0.457532	0.00383856
8.376	694.775	69.3803	9.98617	230.323	0.430569	0.00359675										229.475	0.461159	0.00386654
8.4	688.986	68.8082	9.99957	230.127	0.427466	0.00357399										229.264	0.4571	0.00383614
8.424	682.603	68.0959	10.0059	230.034	0.430321	0.00359792										229.165	0.459799	0.00385897
8.448	675.808	67.4247	10.0146	229.906	0.433174	0.00362393										229.028	0.462347	0.00388281
8.472	668.849	66.7671	10.0153	229.895	0.435305	0.00364262										229.017	0.464581	0.00390251
8.496	662.178	66.3151	10.0162	229.882	0.436536	0.00365728										229.003	0.465842	0.0039178
8.52	656.562	65.274	10.016	229.885	0.440731	0.00368293										229.006	0.470329	0.00394536
8.544	649.397	64.8082	10.0163	229.882	0.441942	0.00369804										229.002	0.471609	0.00396144
8.568	642.466	64.0274	10.0198	229.829	0.445078	0.00372331										228.946	0.474743	0.00398679
8.592	635.356	63.5616	10.0258	229.741	0.44683	0.00374444										228.852	0.47625	0.00400647
8.616	628.945	62.9452	10.0355	229.597	0.449825	0.00377241										228.699	0.478843	0.00403154
8.64	624.08	62.3333	10.0484	229.408	0.447292	0.00375162										228.498	0.475349	0.00400283
8.664	617.76	61.68	10.0544	229.319	0.450232	0.00377727										228.404	0.478089	0.00402706
8.688	611.853	60.8	10.0674	229.127	0.455155	0.0038154										228.2	0.48247	0.0040608
8.712	606.293	60.0933	10.0824	228.905	0.459491	0.00385204										227.964	0.486051	0.00409151
8.736	599.92	59.2533	10.0986	228.665	0.464643	0.00389453										227.711	0.490375	0.00412743
8.76	593.667	58.6267	10.1158	228.409	0.468813	0.00393369										227.441	0.493532	0.00415872
8.784	588.2	58.0933	10.1307	228.187	0.472428	0.00396802										227.208	0.496228	0.00418589
8.808	582.947	57.36	10.1452	227.971	0.477315	0.00400765										226.982	0.50025	0.00421854
8.832	576.907	56.56	10.1553	227.822	0.482118	0.00404553										226.825	0.504492	0.00425188
8.856	571.48	56.1733	10.1615	227.729	0.484137	0.00406778										226.728	0.506109	0.00427117
8.88	567.143	55.7013	10.166	227.662	0.480388	0.00403632										226.658	0.50183	0.00423516
8.904	561.922	55.2208	10.1704	227.595	0.482883	0.00405931										226.588	0.504072	0.00425627
8.928	556.844	54.7273	10.1765	227.505	0.485687	0.00408464										226.494	0.506504	0.00427873
8.952	551.104	54.1688	10.1773	227.492	0.488263	0.00410669										226.48	0.509121	0.00430125
8.976	546.247	53.7792	10.175	227.527	0.489594	0.00411959										226.517	0.510703	0.00431637
9	541.078	53.1818	10.1775	227.49	0.492792	0.00414478										226.478	0.513831	0.00434104
9.024	536.532	52.7273	10.1783	227.478	0.495018	0.00416351										226.465	0.516083	0.00436009
9.048	531.675	52.1688	10.1804	227.445	0.498073	0.00418754										226.432	0.519086	0.00438373
9.072	526.052	51.7143	10.1823	227.418	0.500245	0.00420906										226.403	0.521193	0.00440497
9.096	521	51.2078	10.183	227.407	0.502814	0.00423059										226.392	0.523808	0.00442699
9.12	517.139	50.6962	10.1909	227.288	0.500084	0.00420602										226.268	0.520281	0.00439561
9.144	511.481	50.1899	10.2022	227.118	0.503766	0.00424157										226.092	0.523116	0.0044245
9.168	507.266	49.7342	10.2106	226.993	0.507119	0.0042709										225.962	0.525852	0.00444889
9.192	502.785	49.3165	10.2165	226.905	0.509893	0.0042966										225.87	0.528193	0.00447119
9.216	498.127	48.9241	10.2282	226.727	0.513163	0.00432951										225.686	0.530489	0.00449634
9.24	493.684	48.1899	10.2403	226.546	0.519225	0.00437481										225.499	0.535612	0.00453383
9.264	488.861	47.4684	10.2489	226.416	0.524838	0.00441659										225.365	0.540561	0.00457011
9.288	484.38	47.1772	10.2575	226.285	0.527159	0.00444337										225.231	0.542098	0.00459068
9.312	479.835	46.7848	10.2658	226.16	0.530272	0.00447374										225.102	0.544469	0.0046151
9.336	475.582	46.1646	10.2764	225.999	0.535723	0.00451601										224.937	0.548969	0.00464953
9.36	472.062	45.8025	10.288	225.823	0.5327	0.00449335										224.756	0.544666	0.00461608
9.384	467.37	45.3951	10.2949	225.718	0.535852	0.00452367										224.65	0.547164	0.00464114
9.408	462.481	44.963	10.3	225.64	0.538982	0.00455317										224.57	0.54981	0.00466677
9.432	458.235	44.5309	10.3083	225.515	0.542745	0.00458682										224.442	0.552752	0.00469372
9.456	453.864	44.0123	10.3189	225.353	0.547634	0.00462805										224.278	0.556557	0.00472602
9.48	449.667	43.6173	10.3266	225.236	0.551135	0.00466051										224.159	0.559247	0.00475184
9.504	445.037	43.1235	10.3349	225.108	0.555581	0.00469909										224.029	0.562799	0.00478307
9.528	440.926	42.5802	10.3455	224.946	0.561055	0.00474326										223.865	0.5671	0.00481752
9.552	436.951	42.1852	10.3595	224.732	0.565741	0.004787										223.649	0.570158	0.00484774
9.576	433.346	41.7778	10.3753	224.488	0.571036	0.0048347										223.403	0.573537	0.00487944
9.6	429.976	41.3976	10.3907	224.25	0.569191	0.00482198										223.165	0.569751	0.00485019
9.624	425.952	40.9639	10.4111	223.935	0.575489	0.00488029										222.851	0.573423	0.00488644
9.648	421.759	40.506	10.4298	223.645	0.581895	0.00493874										222.562	0.5773	0.00492358
9.672	417.578	40	10.4446	223.414	0.588335	0.00499409										222.333	0.581647	0.00496131
9.696	413.675	39.5301	10.4589	223.191	0.594549	0.0050477										222.113	0.585762	0.00499722
9.72	409.675	39.0843	10.4724	222.981	0.600462	0.00509987										221.906	0.589632	0.00503214
9.744	405.458	38.494	10.4842	222.794	0.607805	0.00515797										221.724	0.595069	0.00507428
9.768	401.639	38.1566	10.4934	222.65	0.612049	0.00519853										221.582	0.597825	0.00510219
9.792	397.53	37.7952	10.5036	222.49	0.616719	0.00524333										221.426	0.600815	0.00513265
9.816	393.88	37.4578	10.5104	222.382	0.620725	0.00528041										221.321	0.60364	0.00515969
9.84	390.247	37.0941	10.5161	222.291	0.617517	0.00525438										221.233	0.599613	0.00512645
9.864	386.906	36.7882	10.5246	222.157	0.621633	0.00529318										221.103	0.602253	0.00515261
9.888	383.412	36.5176	10.5309	222.058	0.624893	0.00532638										221.007	0.604396	0.00517617
9.912	379.6	36.0706	10.5397	221.919	0.63079	0.00537576										220.872	0.608647	0.00521162
9.936	376.424	35.8	10.5547	221.68	0.636023	0.00542781										220.642	0.611163	0.00524018
9.96	372.941	35.4235	10.574	221.371	0.643527	0.00549712										220.346	0.615008	0.00527793
9.984	369.129	34.9059	10.5942	221.047	0.65319	0.00557938										220.038	0.620604	0.00532536
10.008	365.576	34.4824	10.6121	220.758	0.661497	0.00565289										219.763	0.625141	0.00536637
10.032	362.424	34.1176	10.631	220.452	0.66958	0.00572607										219.476	0.629144	0.00540421
10.056	359.329	33.6353	10.6487	220.164	0.679358	0.00580615										219.206	0.634799	0.00544904
10.08	356.368	33.2184	10.6651	219.897	0.680249	0.00581261										218.957	0.632297	0.00542607
10.104	352.885	32.8506	10.6783	219.681	0.687488	0.00587764										218.756	0.636271	0.00546276
10.128	349.897	32.6552	10.6933	219.433	0.692951	0.0059361										218.528	0.638109	0.00548896
10.152	346.678	32.3793	10.7069	219.208	0.69931	0.00599827										218.321	0.640975	0.00552025
10.176	343.609	32.0575	10.7237	218.929	0.707465	0.0060737										218.066	0.644656	0.00555638
10.2	340.759	31.8621	10.7384	218.685	0.713287	0.00613509										217.844	0.646582	0.00558282
10.224	336.874	31.5632	10.7468	218.544	0.718705	0.00618995										217.716	0.649497	0.00561516
10.248	333.448	31.046	10.7579	218.358	0.728867	0.0062695										217.548	0.655994	0.00566366
10.272	330.092	30.7011	10.7773	218.03	0.738879	0.00636291										217.255	0.660164	0.00570534
10.296	326.966	30.2529	10.7984	217.673	0.751707	0.00647271										216.937	0.666158	0.00575554
10.32	324.337	29.9101	10.8251	217.216	0.756584	0.00652114										216.534	0.663316	0.00573526
10.344	321.348	29.6966	10.8509	216.77	0.767674	0.00663499										216.145	0.665802	0.00577115
10.368	318.36	29.3034	10.8838	216.197	0.785286	0.00679614										215.651	0.671337	0.00582467
10.392	315.449	28.8652	10.906	215.806	0.800693	0.00692841										215.319	0.677601	0.00587656
10.416	312.056	28.5281	10.9302	215.375	0.815297	0.0070667										214.957	0.68207	0.00592345
10.44	308.843	28.0449	10.9519	214.986	0.832697	0.00721445										214.633	0.689216	0.00598116
10.464	305.685	27.8427	10.9717	214.628	0.843945	0.00733148										214.338	0.691518	0.00601545
10.488	302.899	27.4494	10.9903	214.288	0.859586	0.00746665										214.061	0.697451	0.00606473
10.512	300.157	27.3258	11.0037	214.042	0.867124	0.00755222										213.862	0.698499	0.00608871
10.536	297.742	27.0225	11.0136	213.858	0.877533	0.00764165										213.714	0.702996	0.00612589
10.56	295.462	26.7473	11.0178	213.78	0.874897	0.00761506										213.651	0.699229	0.00608971
10.584	292.692	26.4615	11.016	213.814	0.878924	0.00764554										213.679	0.703172	0.00612059
10.608	289.824	26.2857	11.0201	213.738	0.883329	0.00769467										213.618	0.705085	0.00614544
10.632	286.648	26.033	11.0237	213.671	0.88922	0.00775191										213.565	0.708334	0.00617809
10.656	283.835	25.7143	11.0367	213.428	0.902081	0.00786657										213.372	0.713237	0.00622141
10.68	281.505	25.6264	11.0455	213.262	0.907509	0.00793273										213.241	0.713818	0.00624025
10.704	279.033	25.3846	11.0511	213.156	0.915092	0.00800126										213.157	0.717374	0.00627243
10.728	276.44	25.0769	11.0522	213.136	0.921853	0.0080535										213.142	0.722218	0.00630927
10.752	274.187	24.7582	11.058	213.025	0.932031	0.00813424										213.055	0.727637	0.0063495
10.776	271.209	24.3736	11.0653	212.888	0.944568	0.0082361										212.948	0.734181	0.00639982
10.8	268.925	24.1935	11.0712	212.775	0.941132	0.00821331										212.861	0.728842	0.00635809
10.824	266.484	23.9892	11.0804	212.599	0.950583	0.0083044										212.725	0.731937	0.00639051
10.848	263.839	23.828	11.0887	212.439	0.958304	0.00838711										212.602	0.733988	0.00641896
10.872	261.032	23.5376	11.0977	212.264	0.97031	0.00849479										212.468	0.738842	0.00646214
10.896	258.065	23.2688	11.1066	212.091	0.981745	0.00860174										212.337	0.743196	0.00650411
10.92	255.731	23.0323	11.1103	212.019	0.989484	0.00866923										212.283	0.747221	0.00653855
10.944	253.194	22.8387	11.1196	211.837	0.99973	0.00877098										212.146	0.750225	0.00657242
10.968	250.634	22.6129	11.1281	211.67	1.01064	0.0088743										212.021	0.754007	0.00660992
10.992	248.419	22.3333	11.1433	211.367	1.02893	0.00903728										211.796	0.759436	0.00665675
11.016	245.667	21.9892	11.1599	211.036	1.05071	0.00922975										211.553	0.766222	0.00671426
11.04	243.453	21.8	11.1747	210.735	1.05592	0.00928999										211.335	0.761458	0.0066803
11.064	240.537	21.4421	11.1868	210.489	1.07589	0.00946274										211.158	0.768624	0.00673885
11.088	238.063	21.2526	11.1994	210.23	1.09136	0.00961521										210.974	0.771903	0.00677675
11.112	235.937	20.9895	11.2161	209.88	1.11447	0.00982401										210.728	0.777432	0.00682544
11.136	233.863	20.7474	11.2265	209.661	1.13173	0.00997747										210.576	0.782493	0.0068686
11.16	231.474	20.5684	11.2284	209.621	1.13812	0.0100411										210.548	0.785635	0.00690071
11.184	229.095	20.3895	11.2356	209.468	1.15001	0.0101586										210.443	0.788859	0.00693611
11.208	226.495	20.1789	11.2428	209.316	1.16316	0.0102858										210.339	0.792839	0.00697692
11.232	224.768	19.9474	11.2516	209.125	1.18039	0.0104343										210.21	0.798148	0.00701901
11.256	222.274	19.7789	11.2485	209.192	1.18135	0.0104487										210.255	0.801062	0.00704931
11.28	220.165	19.6701	11.2473	209.218	1.17005	0.0103611										210.272	0.794264	0.0069981
11.304	217.979	19.3814	11.2444	209.282	1.17675	0.0104008										210.316	0.800955	0.0070445
11.328	215.68	19.0928	11.2371	209.436	1.179	0.0103981										210.421	0.80769	0.00708995
11.352	213.515	18.8969	11.2324	209.537	1.1802	0.0104029										210.49	0.811869	0.00712379
11.376	211.309	18.8557	11.2246	209.702	1.17141	0.010345										210.604	0.811284	0.00713392
11.4	209.041	18.567	11.2204	209.791	1.17734	0.0103772										210.666	0.81834	0.00718294
11.424	207.072	18.4536	11.2176	209.848	1.17736	0.0103859										210.706	0.820247	0.00720619
11.448	204.608	18.3402	11.2113	209.982	1.1732	0.0103623										210.799	0.821711	0.00722963
11.472	202.371	18.1134	11.2009	210.198	1.17074	0.010325										210.951	0.82701	0.00726754
11.496	200.474	17.9278	11.1903	210.418	1.16686	0.0102771										211.107	0.831344	0.00729812
11.52	199.071	17.7879	11.1917	210.388	1.16108	0.0102249										211.086	0.82629	0.00725254
11.544	197.323	17.6768	11.1873	210.478	1.16003	0.0102199										211.15	0.828394	0.0072749
11.568	195.313	17.4747	11.1845	210.535	1.16443	0.0102516										211.191	0.833367	0.00731413
11.592	193.374	17.2929	11.1936	210.348	1.17923	0.0103895										211.057	0.837903	0.00735743
11.616	191.333	17.1111	11.2046	210.122	1.19612	0.0105498										210.897	0.842429	0.00740288
11.64	189.646	16.899	11.2125	209.957	1.21253	0.0106902										210.782	0.84842	0.00745077
11.664	187.98	16.7677	11.2251	209.691	1.23026	0.0108639										210.597	0.851652	0.00748825
11.688	185.828	16.6061	11.2353	209.475	1.24686	0.0110285										210.448	0.855533	0.00753221
11.712	183.97	16.3434	11.2436	209.297	1.26784	0.0112019										210.326	0.863524	0.00759228
11.736	182.051	16.1212	11.2476	209.213	1.28202	0.01132										210.269	0.870076	0.00764397
11.76	180.644	16.0297	11.248	209.204	1.27277	0.0112463										210.263	0.863498	0.0075915
11.784	178.822	15.7822	11.2465	209.235	1.28253	0.0113109										210.284	0.871233	0.00764521
11.808	177.05	15.703	11.2478	209.208	1.28588	0.0113601										210.266	0.872526	0.00766954
11.832	175.495	15.5743	11.2597	208.95	1.30544	0.0115494										210.091	0.876102	0.00770884
11.856	173.832	15.4851	11.2653	208.829	1.31504	0.0116554										210.011	0.877952	0.00773766
11.88	172.109	15.3861	11.2625	208.889	1.31484	0.0116639										210.051	0.880088	0.00776405
11.904	170.545	15.2178	11.2618	208.905	1.32168	0.0117165										210.061	0.885289	0.00780473
11.928	168.812	15.0396	11.2549	209.054	1.32139	0.0116995										210.161	0.890766	0.00784525
11.952	167.584	14.802	11.2565	209.021	1.33631	0.0118002										210.139	0.899543	0.0079011
11.976	166.287	14.6931	11.257	209.008	1.34185	0.0118513										210.131	0.902802	0.00793102
12	164.893	14.6408	11.2629	208.88	1.3372	0.0118362										210.045	0.894712	0.00787564
12.024	163.34	14.5049	11.2711	208.702	1.35397	0.0119955										209.926	0.898925	0.00791756
12.048	161.835	14.3786	11.2778	208.554	1.36873	0.0121368										209.828	0.90281	0.00795682
12.072	160.388	14.2039	11.2904	208.274	1.39568	0.0123793										209.644	0.909057	0.0080104
12.096	159.155	14.1165	11.2992	208.078	1.4122	0.012544										209.518	0.911623	0.00804193
12.12	157.631	13.9612	11.3109	207.813	1.43826	0.0127857										209.347	0.917032	0.00809241
12.144	156.107	13.8447	11.3215	207.569	1.46084	0.0130074										209.193	0.920683	0.00813418
12.168	154.864	13.7282	11.3329	207.305	1.48623	0.0132483										209.028	0.924734	0.00817521
12.192	153.573	13.5146	11.3435	207.058	1.5189	0.0135234										208.875	0.93351	0.00823919
12.216	152.087	13.3204	11.3492	206.922	1.54201	0.013717										208.792	0.941259	0.00829807
12.24	150.981	13.1905	11.3504	206.895	1.53769	0.0136693										208.775	0.937329	0.00825738
12.264	149.562	13.1429	11.3492	206.924	1.53633	0.0136811										208.793	0.93787	0.00827708
12.288	148.133	13.0095	11.3501	206.901	1.54622	0.0137681										208.778	0.942787	0.00831943
12.312	146.638	12.8952	11.35	206.904	1.55235	0.0138284										208.78	0.946692	0.00835739
12.336	145.343	12.8	11.3438	207.051	1.5461	0.0137695										208.87	0.949883	0.00838594
12.36	143.829	12.7429	11.3374	207.201	1.53601	0.0136965										208.963	0.95077	0.00840648
12.384	142.524	12.6381	11.3202	207.599	1.51223	0.0134624										209.212	0.954432	0.00843118
12.408	141.457	12.5333	11.3129	207.768	1.50657	0.0133975										209.319	0.958534	0.00846084
12.432	140.076	12.419	11.3049	207.948	1.50042	0.0133341										209.434	0.962751	0.00849519
12.456	138.771	12.2857	11.2908	208.266	1.48693	0.0131879										209.639	0.968162	0.00853055
12.48	137.972	12.1589	11.2794	208.518	1.46522	0.0129602										209.805	0.964918	0.00848255
12.504	136.243	12.1028	11.2709	208.705	1.45398	0.0128828										209.928	0.965454	0.00850441
12.528	135.056	11.9533	11.2585	208.976	1.44691	0.0127881										210.109	0.972137	0.00854561
12.552	133.794	11.8411	11.2431	209.309	1.43317	0.0126463										210.334	0.976611	0.00857563
12.576	132.495	11.8131	11.229	209.609	1.41477	0.0124963										210.54	0.976114	0.00858362
12.6	131.402	11.7009	11.2121	209.965	1.40136	0.0123517										210.788	0.980885	0.0086119
12.624	130.14	11.6262	11.1852	210.522	1.37431	0.0120941										211.182	0.983086	0.00862427
12.648	128.794	11.5607	11.1618	210.998	1.35208	0.0118903										211.525	0.98461	0.0086371
12.672	127.477	11.4673	11.1324	211.585	1.32799	0.0116542										211.957	0.987807	0.00865364
12.696	126.215	11.3458	11.0992	212.236	1.30503	0.0114149										212.447	0.9928	0.00867531
12.72	125.358	11.2844	11.0762	212.678	1.27684	0.0111503										212.786	0.98571	0.00860359
12.744	124.101	11.2294	11.0456	213.261	1.25432	0.0109424										213.24	0.986566	0.00860746
12.768	123.018	11.1835	11.0286	213.58	1.24293	0.0108436										213.492	0.987326	0.00861723
12.792	121.835	11.1009	11.0149	213.834	1.23705	0.0107876										213.695	0.990284	0.00864133
12.816	121.073	11.0734	10.9975	214.157	1.22536	0.010683										213.954	0.990405	0.00864277
12.84	120.202	10.9633	10.9729	214.605	1.21576	0.0105674										214.319	0.995524	0.00866467
12.864	119.119	10.9358	10.9498	215.025	1.20077	0.0104394										214.665	0.994931	0.00866439
12.888	118.046	10.7248	10.93	215.379	1.20304	0.0104058										214.96	1.00655	0.00872324
12.912	116.862	10.633	10.9194	215.569	1.20142	0.0103878										215.119	1.01034	0.00875392
12.936	115.358	10.5596	10.9161	215.627	1.20208	0.0104115										215.168	1.01246	0.00878786
12.96	114.414	10.5405	10.919	215.576	1.19229	0.0103512										215.125	1.00286	0.00872493
12.984	113.333	10.4414	10.9246	215.476	1.20127	0.0104342										215.041	1.00772	0.00877071
13.008	112.441	10.3784	10.933	215.326	1.20954	0.0105199										214.915	1.01054	0.00880585
13.032	111.378	10.2342	10.9299	215.382	1.21729	0.0105686										214.962	1.01856	0.00886052
13.056	110.577	10.1081	10.917	215.611	1.2184	0.0105488										215.155	1.02578	0.00889999
13.08	109.649	10	10.913	215.683	1.22313	0.0105781										215.215	1.03174	0.00894228
13.104	108.568	9.84685	10.9119	215.701	1.23346	0.010647										215.231	1.04095	0.00900496
13.128	107.676	9.8018	10.9148	215.65	1.23709	0.0106938										215.187	1.04258	0.00903183
13.152	106.856	9.73874	10.9218	215.526	1.24503	0.0107729										215.083	1.04583	0.00906793
13.176	105.658	9.73874	10.9241	215.485	1.24343	0.0108016										215.049	1.04332	0.00908171
13.2	104.947	9.64602	10.9171	215.609	1.23477	0.0107102										215.152	1.0395	0.00903553
13.224	104.212	9.61062	10.9081	215.769	1.23068	0.0106787										215.287	1.04046	0.00904831
13.248	103.274	9.48673	10.8957	215.988	1.23232	0.010668										215.474	1.04785	0.00909276
13.272	102.345	9.38053	10.8847	216.182	1.23339	0.0106599										215.639	1.05402	0.00913255
13.296	101.265	9.28319	10.8705	216.431	1.23159	0.0106327										215.852	1.05916	0.00916853
13.32	100.363	9.23894	10.8677	216.479	1.23183	0.0106472										215.894	1.06066	0.00919257
13.344	99.5221	9.15929	10.861	216.596	1.23345	0.0106546										215.994	1.06516	0.00922648
13.368	98.7699	9.0708	10.8553	216.695	1.23681	0.0106711										216.08	1.07069	0.00926419
13.392	97.6814	8.99115	10.847	216.839	1.23704	0.0106741										216.205	1.07469	0.00930042
13.416	96.6726	8.93805	10.8363	217.023	1.23365	0.0106517										216.365	1.07656	0.0093236
13.44	95.9565	8.86957	10.82	217.304	1.21893	0.0105101										216.611	1.0709	0.00926329
13.464	95	8.7913	10.8099	217.477	1.21873	0.010504										216.764	1.07512	0.00929679
13.488	94.0261	8.72174	10.8054	217.554	1.22063	0.0105251										216.831	1.07872	0.00933241
13.512	93.4	8.65217	10.7907	217.803	1.21838	0.0104889										217.052	1.08296	0.00935537
13.536	92.6348	8.58261	10.7845	217.909	1.22009	0.0104991										217.147	1.08712	0.00938775
13.56	91.8	8.55652	10.7832	217.931	1.2197	0.010516										217.166	1.08731	0.00940751
13.584	91.4348	8.50435	10.7849	217.903	1.22485	0.0105542										217.141	1.0912	0.00943548
13.608	90.7652	8.3913	10.7908	217.802	1.23774	0.0106486										217.051	1.10014	0.00949752
13.632	89.7391	8.36522	10.797	217.696	1.24065	0.0107084										216.957	1.10004	0.00952714
13.656	88.8957	8.23478	10.7972	217.694	1.25223	0.0107857										216.955	1.11025	0.00959539
13.68	88.0769	8.15385	10.7932	217.762	1.24571	0.010724										217.016	1.10621	0.00955578
13.704	87.5299	8.07692	10.801	217.628	1.25665	0.010813										216.897	1.11247	0.00960472
13.728	86.6923	7.97436	10.8068	217.53	1.26867	0.0109098										216.81	1.12054	0.00966802
13.752	86.0513	7.93162	10.807	217.525	1.27164	0.0109431										216.806	1.12306	0.00969656
13.776	85.265	7.89744	10.8166	217.363	1.27823	0.0110259										216.663	1.12456	0.00973178
13.8	84.6154	7.87179	10.8291	217.148	1.28602	0.0111205										216.475	1.12565	0.00976409
13.824	84.0256	7.76923	10.8367	217.016	1.30058	0.0112301										216.359	1.13479	0.00982834
13.848	83.4701	7.71795	10.8459	216.857	1.31024	0.0113219										216.221	1.1388	0.00986942
13.872	82.8547	7.65812	10.8523	216.747	1.31922	0.0114038										216.125	1.1435	0.00991331
13.896	82.3077	7.59829	10.8758	216.337	1.33913	0.0115932										215.772	1.14892	0.00997251
13.92	81.8571	7.48739	10.9166	215.619	1.36678	0.0118355										215.161	1.15093	0.00998761
13.944	81.0504	7.44538	10.9618	214.808	1.40135	0.012198										214.486	1.15413	0.0100612
13.968	80.521	7.36134	11.0065	213.99	1.44584	0.0126133										213.82	1.16285	0.0101525
13.992	79.8992	7.30252	11.0569	213.046	1.49579	0.0131056										213.072	1.16854	0.0102371
14.016	79.3445	7.14286	11.1009	212.202	1.56099	0.0136626										212.421	1.18614	0.010371
14.04	78.7143	7	11.1465	211.305	1.63223	0.0142892										211.75	1.20202	0.0105009
14.064	77.9664	6.93277	11.1843	210.539	1.68818	0.0148323										211.194	1.20838	0.0105839
14.088	77.2521	6.83193	11.2175	209.851	1.74965	0.0153953										210.708	1.21908	0.0106832
14.112	76.5294	6.73109	11.2397	209.381	1.79939	0.0158404										210.383	1.22985	0.010775
14.136	75.7983	6.70588	11.2652	208.831	1.8436	0.0163033										210.012	1.2309	0.0108238
14.16	75.3058	6.64463	11.2822	208.457	1.8685	0.0165388										209.764	1.22715	0.0107942
14.184	74.6612	6.57851	11.2903	208.277	1.89389	0.0167704										209.646	1.23373	0.0108533
14.208	74.1074	6.58678	11.3008	208.042	1.90979	0.0169784										209.494	1.23078	0.010866
14.232	73.3802	6.56198	11.3042	207.965	1.91787	0.0170906										209.444	1.23154	0.010897
14.256	72.8017	6.4876	11.2983	208.098	1.91826	0.0170636										209.53	1.23944	0.0109499
14.28	72.157	6.38843	11.3	208.06	1.93918	0.0172162										209.506	1.25077	0.0110278
14.304	71.4711	6.30579	11.2993	208.076	1.95187	0.0173079										209.516	1.25986	0.0110948
14.328	70.9835	6.24793	11.2924	208.231	1.94786	0.0172462										209.616	1.26625	0.0111372
14.352	70.3223	6.19835	11.2913	208.254	1.95304	0.017298										209.631	1.27092	0.0111825
14.376	69.6942	6.16529	11.3012	208.032	1.97692	0.0175489										209.488	1.27344	0.0112256
14.4	69.2195	6.11382	11.3088	207.86	1.98561	0.0176317										209.377	1.26883	0.0111852
14.424	68.6911	6.06504	11.312	207.788	2.00051	0.0177681										209.332	1.27404	0.0112323
14.448	68.0976	6.04065	11.3152	207.715	2.00961	0.0178824										209.285	1.27538	0.0112637
14.472	67.439	6	11.3253	207.483	2.03778	0.0181709										209.139	1.27897	0.0113143
14.496	66.8293	5.9187	11.3406	207.125	2.0904	0.0186445										208.916	1.28908	0.0113989
14.52	66.2683	5.86179	11.3583	206.706	2.14645	0.0191755										208.66	1.29578	0.0114676
14.544	65.6748	5.79675	11.3727	206.359	2.19924	0.0196663										208.453	1.30371	0.0115411
14.568	65.2602	5.73984	11.3843	206.073	2.24628	0.0200917										208.284	1.31121	0.0116035
14.592	64.8211	5.65041	11.408	205.478	2.34545	0.0209785										207.943	1.32415	0.0117032
14.616	64.4065	5.5935	11.4311	204.879	2.44455	0.0219026										207.61	1.332	0.0117773
14.64	64.024	5.568	11.4379	204.7	2.45666	0.0220402										207.513	1.32396	0.011717
14.664	63.368	5.52	11.4399	204.646	2.47475	0.0222201										207.484	1.32925	0.0117717
14.688	62.768	5.48	11.4405	204.63	2.48495	0.0223296										207.476	1.33347	0.0118181
14.712	62.376	5.408	11.4324	204.846	2.47187	0.0221388										207.593	1.34424	0.0118802
14.736	61.792	5.376	11.4137	205.332	2.40659	0.0215272										207.86	1.34719	0.0119042
14.76	61.192	5.384	11.3953	205.799	2.33578	0.0209226										208.126	1.34292	0.0118946
14.784	60.624	5.352	11.3873	206	2.31505	0.0207393										208.242	1.34593	0.0119277
14.808	60.216	5.312	11.3787	206.212	2.29733	0.0205543										208.366	1.35116	0.0119639
14.832	59.56	5.28	11.3623	206.611	2.2536	0.0201566										208.603	1.35373	0.0119924
14.856	59.04	5.24	11.3404	207.131	2.20214	0.0196543										208.92	1.3584	0.01202
14.88	58.7874	5.19685	11.3231	207.533	2.15252	0.0191492										209.17	1.35425	0.0119534
14.904	58.3071	5.11024	11.3118	207.792	2.14776	0.0190298										209.334	1.36806	0.0120321
14.928	57.7323	5.07087	11.3143	207.735	2.16096	0.0191655										209.298	1.37276	0.0120841
14.952	57.0787	5.06299	11.321	207.582	2.17411	0.0193582										209.201	1.37103	0.0121132
14.976	56.7323	5.02362	11.3296	207.382	2.20475	0.019639										209.075	1.37697	0.0121661
15	56.252	4.97638	11.3377	207.194	2.23636	0.0199325										208.958	1.38383	0.0122298
15.024	55.7638	4.96063	11.3438	207.051	2.25338	0.0201345										208.87	1.38444	0.0122626
15.048	55.4331	4.88189	11.3365	207.222	2.25685	0.0200828										208.976	1.39848	0.0123401
15.072	55.0709	4.82677	11.3306	207.36	2.25658	0.0200358										209.062	1.40782	0.012398
15.096	54.6378	4.80315	11.3395	207.151	2.28428	0.020322										208.932	1.41046	0.0124411
	54.4031	4.7907	11.3429
	53.9845	4.74419	11.3437
	53.5736	4.72868	11.3407
	53.1783	4.69767	11.3263
	52.8062	4.64341	11.3081
	52.4341	4.62791	11.2935
	51.9147	4.58915	11.2818
	51.3488	4.5814	11.2679
	50.7752	4.53488	11.257
	50.5736	4.51163	11.2531
	50.1679	4.47328	11.2438
	49.7939	4.43511	11.2391
	49.3588	4.39695	11.2325
	48.8626	4.35878	11.2402
	48.5496	4.30534	11.2561
	48.0916	4.26718	11.2756
	47.8702	4.24427	11.2978
	47.5344	4.22901	11.3177
	47.1527	4.17557	11.3435
	46.7863	4.1145	11.3713
	46.5564	4.07519	11.3905
	46.1805	4.03008	11.411
	45.8722	4.00752	11.4396
	45.5188	3.95489	11.47
	45.1955	3.92481	11.4965
	44.7444	3.89474	11.5127
	44.3383	3.85714	11.5275
	44.0226	3.79699	11.5557
	43.6842	3.77444	11.5878
	43.3759	3.74436	11.6048
	43.1185	3.73333	11.6201
	43	3.71111	11.6404
	42.7185	3.62963	11.6507
	42.3926	3.59259	11.6532
	42.1037	3.6	11.6572
	41.7185	3.57037	11.6673
	41.4667	3.54074	11.6747
	41.0148	3.53333	11.6883
	40.7185	3.5037	11.696
	40.363	3.47407	11.6842
	40.1241	3.43066	11.6855
	39.7299	3.41606	11.6898
	39.4088	3.35766	11.692
	39.1095	3.29927	11.6994
	38.7591	3.32117	11.706
	38.4599	3.28467	11.7072
	38.1095	3.24818	11.7103
	37.8613	3.22628	11.721
	37.6277	3.21898	11.7205
	37.3869	3.19708	11.7136
	37.2374	3.20144	11.7272
	36.964	3.15108	11.7476
	36.7626	3.1295	11.7523
	36.4604	3.10791	11.7529
	36.2662	3.07914	11.7586
	35.9712	3.04317	11.7594
	35.7986	3	11.7716
	35.5252	3.01439	11.7862
	35.3094	3.00719	11.8081
	35.0863	2.98561	11.8336
	34.8582	2.97872	11.8406
	34.5461	2.93617	11.8399
	34.2411	2.87943	11.8231
	34.1773	2.85106	11.8174
	33.9078	2.8227	11.8166
	33.6312	2.83688	11.8192
	33.4255	2.82979	11.8211
	33.1631	2.8227	11.8095
	32.922	2.80851	11.7909
	32.7872	2.79433	11.7707
	32.6224	2.76923	11.7588
	32.3007	2.75524	11.7678
	32.0629	2.75524	11.7778
	31.8741	2.72727	11.7903
	31.6783	2.69231	11.8022
	31.4056	2.64336	11.8091
	31.1818	2.60839	11.8123
	31.014	2.6014	11.8234
	30.6713	2.58042	11.85
	30.4196	2.56643	11.8771
