# Supplementary material for: Tropospheric temperature retrievals using nonlinear calibration functions in the pure rotational Raman lidar technique
Source: Copernicus journal article supplement (doi:10.5194/amt-2016-189), 2016-06-13
Supplement: Supplementary file 25 [file 02.10.2014. Temperature profile retrieved using Eqs. (15) and (20).xlsx]

## Sheet: Лист1
z, km
Altitude	Smoothed signals	Smoothed signals	Smoothed ratio
0.048	573	65.5	8.59143	250.575	2.15267	0.0173674	A2	0.075	282.75	0.143	286.15	0.83	277.15			251.586	2.30391	0.0185129
0.072	743	82	8.45197	252.58	1.56071	0.0123269	8.15441	0.182	283.75	0.188	285.55	1.51	274.35			253.708	1.6326	0.0128374
0.096	995.333	113	8.38058	253.607	1.31003	0.0104155		0.199	283.55	0.484	282.75	3.05	266.15	3.048	0.645479	254.775	1.35098	0.0106918	0.222412
0.12	1177.67	135	8.307	254.667	1.18639	0.00942791	B2	0.24	283.25	0.737	280.25	5.61	250.65	5.616	1.19514	255.859	1.20323	0.00951723	0.269823
0.144	1215.67	150.333	8.2572	255.385	1.09636	0.00894994	-497.892	0.647	280.35	0.835	279.35	7.21	238.15	7.2	0.874709	256.583	1.09809	0.00892222	1.2255
0.168	1204.67	148.333	8.21704	255.965	1.10049	0.00894786		0.821	277.75	1.517	273.55	9.14	224.15	9.144	2.80314	257.16	1.09032	0.00882392	1.79634
0.192	1167.67	153.333	8.11769	257.401	1.05271	0.00873837	C2	1.186	273.95	1.555	273.25	12	210.65	12	1.5583	258.562	1.01208	0.00836339	0.557064
0.216	1124.33	142.667	8.00646	259.012	1.08996	0.00886503	-0.0160297	1.341	274.55	2.11	268.65					260.082	1.00717	0.00815791
0.24	1085.2	140.6	7.94315	259.932	0.84042	0.00686978		1.5	275.35	2.702	268.65					260.921	0.756833	0.00616306
0.264	1046.4	134	7.84723	261.328	0.855922	0.00692573		1.548	275.15	3.053	266.65					262.152	0.737583	0.00594943
0.288	1008.2	129	7.81317	261.825	0.869803	0.00702228		1.605	274.75	3.943	262.05					262.577	0.73673	0.0059309
0.312	976.8	127.6	7.78997	262.164	0.867631	0.00705583		2.242	269.65	4.143	262.05					262.862	0.72593	0.0058878
0.336	954.6	121.8	7.79515	262.088	0.894353	0.00720495		2.449	270.05	4.257	262.05					262.798	0.750366	0.00602865
0.36	928	114.4	7.78307	262.265	0.930542	0.00738776		2.661	268.55	5.195	255.85					262.946	0.775664	0.00614219
0.384	901.8	117.6	7.76429	262.539	0.902083	0.00732027		2.879	267.05	5.59	253.25					263.174	0.744188	0.00602442
0.408	888.4	115.2	7.73749	262.931	0.910656	0.00736156		3.046	265.85	5.62	252.65					263.495	0.739837	0.0059679
0.432	870	110.6	7.70801	263.363	0.932067	0.00746124		3.192	264.45	6.572	244.15					263.843	0.744021	0.0059451
0.456	842.4	109.8	7.69118	263.61	0.927535	0.00749471		3.397	264.45	7.03	240.05					264.039	0.732734	0.00591106
0.48	834.571	107.714	7.66519	263.991	0.791811	0.00636281		3.502	263.55	7.22	239.65					264.337	0.615198	0.00493712
0.504	819.857	109.143	7.60088	264.937	0.775288	0.00628842		3.763	261.45	8.3	232.65					265.056	0.576297	0.00467228
0.528	801.857	106.714	7.59068	265.087	0.783425	0.00635		3.983	262.45	8.402	232.05					265.167	0.578026	0.00468373
0.552	793	105.857	7.59838	264.974	0.786436	0.00638531		4.168	261.15	9.18	225.45					265.084	0.583525	0.00473586
0.576	785.429	105.143	7.5932	265.05	0.788101	0.00640462		5.002	255.25	10.36	215.85					265.14	0.582554	0.0047326
0.6	784.286	103.857	7.61335	264.753	0.796855	0.00645348		5.497	251.45	10.827	211.45					264.919	0.597647	0.00483713
0.624	774.286	104.571	7.61857	264.677	0.79	0.00645323		5.6	250.65	11.324	210.05					264.861	0.594693	0.00485444
0.648	768.571	101.714	7.63633	264.415	0.806988	0.00654223		5.718	249.65	11.382	209.85					264.664	0.615012	0.00498121
0.672	771.857	99	7.64876	264.233	0.826155	0.0066157		5.763	249.25	11.74	210.45					264.524	0.634937	0.00507887
0.696	777.571	99.5714	7.66158	264.044	0.825097	0.00660755		5.99	248.05	12.161	211.55					264.378	0.639544	0.00511513
0.72	768.333	97.3333	7.6564	264.12	0.737849	0.00588115		6.036	247.65	13.54	215.25					264.437	0.569964	0.00453755
0.744	771	98.7778	7.63705	264.405	0.72889	0.00583031		6.903	240.35	13.753	216.05					264.656	0.555764	0.00444128
0.768	775	100.556	7.63752	264.398	0.719891	0.00578861		7.2	237.85	15.715	214.55					264.65	0.54908	0.00441092
0.792	781.222	102.111	7.62574	264.571	0.712159	0.00574018		8.398	227.85	16.08	214.25					264.782	0.538793	0.00433935
0.816	798	104.556	7.60098	264.935	0.701766	0.00565429		9.12	222.85							265.055	0.521683	0.00420143
0.84	819.556	110.556	7.59542	265.017	0.676442	0.00551577		10.149	215.05							265.116	0.500831	0.0040823
0.864	852.111	116.111	7.58929	265.107	0.657771	0.00538475		10.3	214.45							265.182	0.484823	0.00396781
0.888	892.444	120.444	7.60136	264.93	0.64833	0.00528933		11.123	209.25							265.051	0.482094	0.00393132
0.912	955.556	128.667	7.6145	264.736	0.628419	0.00512565		11.179	209.05							264.906	0.471703	0.00384493
0.936	1040	138.222	7.64123	264.343	0.610038	0.00495575		11.589	209.35							264.609	0.466469	0.00378564
0.96	1185.45	153	7.67286	263.879	0.530352	0.00426359		11.68	209.45							264.25	0.414114	0.00332446
0.984	1307.73	167.091	7.72722	263.082	0.511424	0.00410686		11.899	209.05							263.617	0.412991	0.00330969
1.008	1458.45	183.727	7.80198	261.988	0.492993	0.00395246		12.061	210.15							262.714	0.415129	0.00331899
1.032	1631.73	207.818	7.87218	260.964	0.465162	0.0037607		12.469	212.75							261.837	0.405719	0.00326919
1.056	1817.18	228.727	7.94085	259.965	0.447728	0.00361627		12.576	213.45							260.951	0.402802	0.00324111
1.08	2019.73	253.091	7.99554	259.171	0.428391	0.00346443		13.47	214.25							260.228	0.394164	0.00317468
1.104	2254	281.364	8.02276	258.776	0.407797	0.00329779		14.322	217.05							259.863	0.379179	0.00305353
1.128	2522.55	309.091	8.04175	258.5	0.391764	0.00314795		15.201	216.75							259.606	0.366858	0.00293527
1.152	2812.27	343.727	8.04945	258.389	0.372032	0.0029877		16.03	216.45							259.501	0.349362	0.00279361
1.176	3118.09	381.091	8.06217	258.204	0.353767	0.002843										259.328	0.333732	0.00267037
1.2	3465.31	426.462	8.06852	258.112	0.30724	0.00247679										259.241	0.290492	0.00233159
1.224	3794.08	471.462	8.06644	258.143	0.291385	0.00235784										259.269	0.275299	0.00221799
1.248	4127.69	513.692	8.06082	258.224	0.278882	0.00225733										259.346	0.262962	0.00211925
1.272	4477.38	558.077	8.03633	258.579	0.266811	0.00215801										259.679	0.24935	0.00200824
1.296	4813.38	602.308	8.00463	259.039	0.255766	0.00206827										260.107	0.23617	0.00190196
1.32	5162.62	644.154	7.97032	259.537	0.246698	0.0019888										260.563	0.2247	0.00180431
1.344	5532.23	695.231	7.93733	260.016	0.236253	0.0019066										260.997	0.212226	0.00170625
1.368	5917.23	744.385	7.90261	260.521	0.227506	0.00183322										261.447	0.201257	0.00161596
1.392	6292.23	797.308	7.8627	261.102	0.218568	0.00176245										261.957	0.189775	0.00152528
1.416	6655.62	849.692	7.81939	261.734	0.210435	0.00169796										262.5	0.178814	0.00143861
1.44	6988.73	895.467	7.77674	262.357	0.189891	0.00153084										263.023	0.157739	0.00126842
1.464	7337.4	945.2	7.72794	263.071	0.183732	0.00148043										263.608	0.148433	0.00119357
1.488	7669.73	1000.53	7.67931	263.784	0.177169	0.00143113										264.176	0.138912	0.00112043
1.512	8015.13	1055.13	7.62836	264.532	0.1713	0.00138503										264.753	0.129835	0.0010489
1.536	8346.33	1106	7.57969	265.249	0.166284	0.00134455										265.286	0.121691	0.000983842
1.56	8686.87	1154.8	7.5365	265.886	0.161971	0.00130829										265.745	0.114626	0.000926364
1.584	9007.73	1204.6	7.49374	266.518	0.157731	0.00127421										266.184	0.107715	0.00087125
1.608	9319.67	1255.6	7.45458	267.098	0.153645	0.00124241										266.574	0.101313	0.000820845
1.632	9642.33	1305	7.42306	267.565	0.150106	0.00121401										266.877	0.0960543	0.000778861
1.656	9957.27	1353.53	7.39608	267.966	0.146866	0.00118825										267.13	0.0914724	0.000742389
1.68	10249.9	1393.06	7.3723	268.32	0.13572	0.00109653										267.348	0.0824448	0.000668524
1.704	10534.1	1436.29	7.34898	268.667	0.133275	0.00107687										267.556	0.0789137	0.000640273
1.728	10808.7	1474.18	7.32743	268.988	0.131303	0.0010598										267.744	0.0758504	0.000615065
1.752	11076.6	1513.41	7.31191	269.22	0.129355	0.00104397										267.877	0.0733602	0.000595032
1.776	11340.5	1553.59	7.29939	269.407	0.127439	0.00102897										267.982	0.071177	0.000577754
1.8	11591.8	1591.24	7.28651	269.6	0.125713	0.00101519										268.089	0.0690896	0.000561074
1.824	11843.9	1630.06	7.27253	269.809	0.123969	0.00100145										268.203	0.066916	0.000543798
1.848	12066.1	1666.41	7.26044	269.989	0.122362	0.000989279										268.299	0.0650018	0.000528841
1.872	12279.4	1693.29	7.24654	270.198	0.121302	0.000979316										268.409	0.0632334	0.000513907
1.896	12463.6	1718.88	7.23295	270.401	0.120258	0.000970199										268.514	0.0615087	0.000499717
1.92	12597.4	1746.05	7.22249	270.558	0.112601	0.000909858										268.594	0.0567342	0.000461787
1.944	12763.7	1771.74	7.21348	270.694	0.11165	0.000902305										268.662	0.0555163	0.00045205
1.968	12898.6	1791.16	7.20491	270.822	0.110953	0.000896396										268.725	0.054468	0.000443483
1.992	13030.4	1815.05	7.19718	270.938	0.11005	0.000889907										268.782	0.0533924	0.000435216
2.016	13146.2	1833.63	7.18733	271.086	0.10936	0.000884356										268.853	0.0522514	0.00042605
2.04	13264.1	1846.21	7.17884	271.214	0.108979	0.000880066										268.914	0.0513733	0.000418416
2.064	13352.4	1858.21	7.17255	271.309	0.108576	0.000876449										268.958	0.0506669	0.000412567
2.088	13425.9	1872.05	7.16648	271.4	0.108059	0.000872708										269.001	0.0499262	0.000406812
2.112	13469.7	1882.37	7.15994	271.499	0.107634	0.000869803										269.046	0.0491922	0.000401153
2.136	13524.2	1893.26	7.15648	271.551	0.107238	0.000867093										269.07	0.048727	0.000397624
2.16	13515.3	1888.24	7.1538	271.591	0.102178	0.000825341										269.088	0.0462178	0.000376795
2.184	13544.4	1895.48	7.15064	271.639	0.101906	0.000823597										269.109	0.0458469	0.000374013
2.208	13546.8	1898.05	7.14904	271.663	0.101788	0.000822991										269.12	0.0456678	0.000372728
2.232	13537.6	1898.86	7.14829	271.674	0.101727	0.000822856										269.125	0.0455815	0.000372196
2.256	13535	1895.38	7.15136	271.628	0.101895	0.000823771										269.104	0.0458984	0.000374546
2.28	13516.4	1893.05	7.15745	271.536	0.102003	0.000824978										269.063	0.0464247	0.000378923
2.304	13486.1	1886.24	7.16354	271.444	0.102279	0.000826998										269.021	0.0470267	0.000383668
2.328	13454.2	1877	7.17178	271.32	0.102677	0.000829676										268.963	0.0478538	0.000390069
2.352	13417	1872.95	7.1809	271.183	0.102845	0.000831676										268.899	0.0486414	0.00039669
2.376	13357.1	1857.86	7.19185	271.019	0.103465	0.000835887										268.821	0.0497854	0.0004055
2.4	13271.4	1840.61	7.20453	270.828	0.0995145	0.000803529										268.728	0.048824	0.00039731
2.424	13195.2	1826.43	7.21535	270.665	0.100047	0.000807622										268.648	0.0498845	0.000405715
2.448	13115.4	1812.43	7.22483	270.523	0.100559	0.000811611										268.576	0.0508385	0.000413294
2.472	13040.4	1801.78	7.2336	270.392	0.100933	0.00081497										268.509	0.0516723	0.000420147
2.496	12946.2	1785.74	7.24314	270.249	0.101515	0.000819509										268.436	0.0526703	0.000428068
2.52	12865	1767.04	7.25056	270.138	0.10224	0.000824202										268.378	0.0535915	0.000434856
2.544	12755.1	1757.13	7.25733	270.036	0.102496	0.000827625										268.324	0.0542217	0.000440615
2.568	12648.6	1743.65	7.26287	269.953	0.102918	0.000831529										268.28	0.0548499	0.000445926
2.592	12533.1	1725.26	7.26809	269.875	0.103553	0.000836389										268.238	0.0555717	0.000451586
2.616	12423.7	1709.26	7.27497	269.772	0.104113	0.00084103										268.183	0.0563767	0.000458115
2.64	12276	1688.32	7.2824	269.661	0.100551	0.000812468										268.122	0.0549724	0.000446733
2.664	12140.9	1666.6	7.28902	269.562	0.101316	0.000818285										268.068	0.0558585	0.000453659
2.688	12015.2	1649.2	7.29726	269.439	0.101921	0.000823519										268	0.0567752	0.000461204
2.712	11874.9	1628.08	7.3064	269.302	0.102693	0.000829765										267.923	0.0578517	0.000469852
2.736	11733.8	1604.48	7.31615	269.157	0.10361	0.000836676										267.841	0.0590591	0.000479261
2.76	11600.5	1582.28	7.32757	268.986	0.10451	0.000843576										267.743	0.0603822	0.000489652
2.784	11458	1558.2	7.33837	268.825	0.105501	0.000851005										267.649	0.0617215	0.000500052
2.808	11312.2	1539.12	7.3513	268.633	0.106253	0.000857862										267.536	0.0630772	0.000511358
2.832	11159	1517.28	7.36373	268.447	0.107147	0.000865436										267.425	0.0644869	0.000522856
2.856	11014.4	1494.16	7.37587	268.267	0.108157	0.000873313										267.316	0.0659528	0.000534432
2.88	10872.8	1470.48	7.3875	268.094	0.105104	0.000848117										267.21	0.0648828	0.000525292
2.904	10724.4	1451.22	7.39907	267.922	0.105885	0.000855174										267.103	0.0661504	0.000535896
2.928	10578.1	1424.26	7.40919	267.771	0.107131	0.000863874										267.008	0.067618	0.000546813
2.952	10440.3	1406.63	7.42082	267.599	0.107886	0.000870769										266.899	0.0688856	0.000557449
2.976	10296.6	1386.3	7.43357	267.409	0.108814	0.000878622										266.777	0.0703439	0.00056934
3	10153	1364.44	7.44676	267.214	0.109864	0.000887057										266.65	0.0719176	0.0005819
3.024	10016.4	1342.93	7.45958	267.024	0.110938	0.00089547										266.525	0.073489	0.000594299
3.048	9875.26	1322.93	7.47499	266.795	0.111947	0.000904082										266.372	0.0751994	0.000608271
3.072	9736.26	1302.04	7.48991	266.575	0.113044	0.00091302										266.223	0.0769413	0.000622252
3.096	9599.19	1280.78	7.50701	266.322	0.114221	0.000922519										266.05	0.0788914	0.000637825
3.12	9481.24	1261.34	7.52657	266.033	0.11134	0.000899118										265.848	0.0781627	0.000631633
3.144	9340.55	1239.62	7.54798	265.717	0.112599	0.00090944										265.625	0.0804179	0.000649743
3.168	9204.55	1217.62	7.56911	265.405	0.113928	0.000919998										265.4	0.0827114	0.00066793
3.192	9076.72	1195.69	7.59172	265.072	0.115334	0.000930892										265.156	0.0851613	0.00068714
3.216	8948.07	1175.79	7.61521	264.726	0.11663	0.000941598										264.899	0.0875886	0.000706672
3.24	8828.24	1155.14	7.63886	264.378	0.118058	0.00095269										264.635	0.0901282	0.0007266
3.264	8710.79	1134.72	7.66236	264.033	0.119515	0.000963928										264.37	0.0926846	0.000746583
3.288	8587.03	1116.48	7.68479	263.704	0.120794	0.000974697										264.112	0.0950414	0.000765709
3.312	8472.28	1098.38	7.70588	263.394	0.122116	0.000985343										263.867	0.0973527	0.000784119
3.336	8351.72	1079.59	7.72287	263.145	0.123465	0.000995965										263.668	0.0994447	0.000800606
3.36	8244.1	1063.06	7.73931	262.905	0.120603	0.000972782										263.473	0.0980849	0.000789444
3.384	8131.87	1045.87	7.75387	262.692	0.12184	0.000982506										263.299	0.0999247	0.000803921
3.408	8021	1030.74	7.76579	262.517	0.122894	0.000991315										263.156	0.101468	0.000816499
3.432	7913.13	1015.61	7.77521	262.379	0.123956	0.000999893										263.042	0.102881	0.000827805
3.456	7807.42	1003.77	7.78347	262.259	0.124719	0.00100723										262.941	0.103983	0.000837587
3.48	7694.32	987.581	7.79114	262.147	0.125885	0.00101638										262.848	0.105391	0.000848646
3.504	7588.29	972.516	7.79805	262.046	0.12699	0.00102506										262.763	0.10671	0.000859014
3.528	7481.48	958.226	7.80264	261.979	0.12801	0.00103329										262.706	0.107828	0.00086798
3.552	7372.9	945.871	7.80927	261.882	0.128863	0.00104127										262.625	0.108926	0.00087768
3.576	7267.29	931.194	7.81525	261.795	0.12999	0.0010502										262.551	0.110221	0.000887926
3.6	7176.76	917.697	7.82452	261.659	0.127094	0.00102647										262.436	0.108281	0.00087194
3.624	7082.39	904.394	7.83501	261.506	0.128199	0.00103542										262.305	0.109804	0.000884149
3.648	6981.64	892.152	7.84654	261.338	0.129189	0.00104438										262.161	0.111289	0.000896859
3.672	6884.58	876.485	7.85821	261.168	0.130615	0.00105499										262.014	0.113162	0.000911077
3.696	6788.21	863.939	7.87311	260.951	0.131755	0.00106495										261.825	0.114969	0.000926171
3.72	6694.94	849.606	7.88771	260.738	0.133151	0.00107583										261.639	0.116985	0.000941969
3.744	6602.36	835.061	7.9002	260.556	0.134587	0.00108672										261.478	0.118929	0.000956896
3.768	6515.45	821.667	7.91245	260.378	0.135946	0.00109714										261.32	0.120795	0.000971347
3.792	6420.21	809	7.92397	260.21	0.137186	0.0011075										261.171	0.122521	0.000985465
3.816	6333.27	795.758	7.93295	260.08	0.13855	0.00111777										261.054	0.124224	0.000998448
3.84	6251.94	784.943	7.94155	259.955	0.135596	0.00109412										260.942	0.122026	0.000980903
3.864	6160	774.086	7.94764	259.866	0.136589	0.00110291										260.862	0.123239	0.000991315
3.888	6071.34	762.171	7.95139	259.812	0.137741	0.00111198										260.813	0.124475	0.00100103
3.912	5988.37	753.029	7.95346	259.782	0.138537	0.00111931										260.786	0.125304	0.0010085
3.936	5906.91	742.686	7.95487	259.761	0.139522	0.0011273										260.767	0.12627	0.00101629
3.96	5823.94	732.4	7.95549	259.752	0.140499	0.00113532										260.759	0.127187	0.00102378
3.984	5741.86	722.514	7.95536	259.754	0.141432	0.00114313										260.761	0.128025	0.00103077
4.008	5657.2	711.8	7.95689	259.732	0.142517	0.00115195										260.741	0.129089	0.00103938
4.032	5579.34	701.6	7.95617	259.742	0.143562	0.00116008										260.75	0.129996	0.00104641
4.056	5501.97	691.943	7.95628	259.741	0.144557	0.00116819										260.749	0.130904	0.00105377
4.08	5432.78	682.027	7.95673	259.734	0.14169	0.00114422										260.743	0.128332	0.00103234
4.104	5355.3	672.486	7.95664	259.735	0.142679	0.00115233										260.744	0.129223	0.00103962
4.128	5287.14	663	7.95821	259.713	0.143773	0.00116061										260.723	0.130299	0.00104776
4.152	5212.03	654.946	7.96395	259.629	0.144651	0.00116906										260.648	0.131407	0.00105788
4.176	5140.84	646.351	7.97116	259.524	0.145688	0.00117818										260.552	0.132743	0.00106925
4.2	5069.51	637	7.97678	259.443	0.146857	0.00118771										260.478	0.134114	0.00108034
4.224	4998.05	628.622	7.98297	259.353	0.147882	0.00119688										260.396	0.135387	0.00109137
4.248	4924.11	618.27	7.98933	259.261	0.149275	0.00120775										260.311	0.137011	0.00110405
4.272	4858.49	606.486	7.99731	259.145	0.151075	0.00121999										260.205	0.139101	0.00111872
4.296	4796.84	597.243	8.00726	259.001	0.152493	0.00123084										260.071	0.140953	0.00113301
4.32	4737.69	591.231	8.0202	258.813	0.149379	0.00120769										259.897	0.138761	0.00111717
4.344	4678.33	582.333	8.03196	258.642	0.150793	0.00121867										259.739	0.140696	0.00113226
4.368	4616.08	574.615	8.04528	258.449	0.151997	0.00122934										259.558	0.142518	0.00114776
4.392	4556.69	565.179	8.05919	258.247	0.15362	0.00124163										259.369	0.144766	0.00116501
4.416	4498.9	557.667	8.06854	258.112	0.154819	0.00125167										259.241	0.146381	0.0011783
4.44	4439.31	548.333	8.07763	257.98	0.15642	0.00126347										259.116	0.148367	0.00119316
4.464	4380.46	541.615	8.08983	257.804	0.157533	0.00127384										258.948	0.150051	0.00120798
4.488	4318.38	533.308	8.09798	257.686	0.158934	0.00128515										258.836	0.151805	0.00122205
4.512	4264.74	525.385	8.10577	257.573	0.160358	0.00129595										258.728	0.153565	0.00123551
4.536	4205.62	518.333	8.11186	257.485	0.161523	0.00130605										258.643	0.154992	0.00124763
4.56	4154.27	510.878	8.11885	257.384	0.158884	0.00128408										258.546	0.15281	0.00122944
4.584	4099.34	503.146	8.12319	257.321	0.160253	0.00129446										258.486	0.154345	0.00124112
4.608	4040.54	497.39	8.12924	257.233	0.161147	0.00130365										258.401	0.155509	0.00125236
4.632	3983.66	490.659	8.13433	257.16	0.162306	0.0013137										258.33	0.156883	0.00126405
4.656	3929.83	483.415	8.14038	257.072	0.163673	0.00132454										258.246	0.158507	0.00127691
4.68	3880.63	476.488	8.14835	256.957	0.165071	0.00133547										258.134	0.160261	0.00129065
4.704	3832.37	470.585	8.15564	256.852	0.166222	0.00134536										258.031	0.161743	0.00130313
4.728	3781.41	463.732	8.16324	256.742	0.167632	0.00135665										257.924	0.163495	0.00131711
4.752	3734.41	458.024	8.17689	256.545	0.168898	0.00136803										257.732	0.165409	0.00133359
4.776	3686.56	450.463	8.19086	256.343	0.170722	0.00138182										257.534	0.167885	0.00135257
4.8	3644.09	444.326	8.20687	256.112	0.168221	0.00136165										257.306	0.166189	0.00133896
4.824	3599.26	438.302	8.22454	255.857	0.169735	0.00137458										257.053	0.168516	0.00135835
4.848	3549.88	431.279	8.24327	255.586	0.171546	0.00138942										256.784	0.171184	0.00138003
4.872	3506.44	423.814	8.2635	255.295	0.173649	0.00140519										256.492	0.174208	0.00140314
4.896	3459.53	418.186	8.2852	254.982	0.1752	0.00141955										256.177	0.176739	0.00142533
4.92	3417.79	411.512	8.30374	254.714	0.177141	0.00143454										255.907	0.179515	0.00144698
4.944	3372.84	404.488	8.32219	254.448	0.179205	0.0014505										255.637	0.182408	0.00146955
4.968	3330.23	398.837	8.34197	254.163	0.18091	0.00146515										255.346	0.184987	0.00149123
4.992	3288.21	392.535	8.35907	253.917	0.18284	0.00148034										255.094	0.187679	0.00151251
5.016	3246.74	386.884	8.3739	253.704	0.184548	0.00149436										254.874	0.190044	0.0015318
5.04	3208.44	382.511	8.38933	253.482	0.181701	0.00147289										254.645	0.187727	0.00151479
5.064	3169.38	377.111	8.40142	253.308	0.183328	0.00148596										254.465	0.189883	0.00153209
5.088	3131.82	371.533	8.41225	253.152	0.185058	0.00149915										254.304	0.192097	0.00154912
5.112	3090	367.022	8.42359	252.989	0.186358	0.00151138										254.134	0.193883	0.00156532
5.136	3050.69	361.6	8.43271	252.857	0.188037	0.00152455										253.997	0.195979	0.00158181
5.16	3014.16	357.022	8.43868	252.771	0.189394	0.00153566										253.908	0.197621	0.00159519
5.184	2979.13	353.044	8.44634	252.661	0.190592	0.00154634										253.793	0.19916	0.00160865
5.208	2941.96	347.844	8.45753	252.5	0.192358	0.00156028										253.624	0.201427	0.00162659
5.232	2908.29	343.178	8.46724	252.361	0.193967	0.00157297										253.478	0.203474	0.00164279
5.256	2871.71	338.756	8.47821	252.203	0.195478	0.00158602										253.312	0.205464	0.00165974
5.28	2838.89	335.66	8.4893	252.043	0.19227	0.00156238										253.145	0.202487	0.00163825
5.304	2803.55	330.915	8.4998	251.892	0.193952	0.00157595										252.986	0.204629	0.00165552
5.328	2770.89	324.936	8.5147	251.678	0.196382	0.00159302										252.759	0.207714	0.00167773
5.352	2736.85	320.617	8.52746	251.495	0.198031	0.00160693										252.565	0.209897	0.00169599
5.376	2700.57	316.234	8.53849	251.336	0.199664	0.00162093										252.397	0.212001	0.00171386
5.4	2667.55	311.681	8.55196	251.143	0.201533	0.00163597										252.191	0.214436	0.00173348
5.424	2634.21	307.809	8.56977	250.887	0.203195	0.00165119										251.918	0.216788	0.00175444
5.448	2602.13	302.489	8.58638	250.648	0.205631	0.00166924										251.663	0.21992	0.00177803
5.472	2567.51	298.617	8.59841	250.475	0.207212	0.00168357										251.478	0.221989	0.00179643
5.496	2536.34	295.064	8.60955	250.315	0.208705	0.00169694										251.307	0.223932	0.00181356
5.52	2509.65	290.959	8.62132	250.146	0.206295	0.00167626										251.125	0.221698	0.00179439
5.544	2480.02	286.592	8.632	249.992	0.208287	0.00169137										250.96	0.224153	0.00181319
5.568	2449.35	283	8.6469	249.778	0.209969	0.00170638										250.729	0.226394	0.00183288
5.592	2418.73	279.306	8.65807	249.618	0.211654	0.00172081										250.556	0.228526	0.00185102
5.616	2390.51	276.082	8.66941	249.455	0.213156	0.00173424										250.38	0.230464	0.00186812
5.64	2363.9	272.673	8.68072	249.292	0.214831	0.00174818										250.204	0.232583	0.00188574
5.664	2336.69	269.327	8.69124	249.141	0.216467	0.00176204										250.041	0.234637	0.00190307
5.688	2312.37	265.122	8.7022	248.984	0.218749	0.00177815										249.87	0.2374	0.00192292
5.712	2287.24	262.143	8.71209	248.842	0.220262	0.00179121										249.716	0.2393	0.00193922
5.736	2260.45	259.143	8.72624	248.638	0.221884	0.00180606										249.495	0.241421	0.00195835
5.76	2236.84	256.51	8.74274	248.401	0.219009	0.00178456										249.236	0.238692	0.00193843
5.784	2211.84	253.039	8.75984	248.156	0.221084	0.00180161										248.968	0.241353	0.00196036
5.808	2185.43	249.078	8.77746	247.902	0.223514	0.00182066										248.692	0.244403	0.00198449
5.832	2158.63	246.314	8.78934	247.732	0.225015	0.00183497										248.505	0.246302	0.00200231
5.856	2132.65	241.922	8.80216	247.547	0.227736	0.00185438										248.303	0.249554	0.00202585
5.88	2109.86	238.667	8.81496	247.364	0.229798	0.00187057										248.102	0.252078	0.00204583
5.904	2085.14	235.412	8.82717	247.188	0.231835	0.0018871										247.909	0.254557	0.00206603
5.928	2059.92	232.235	8.83967	247.008	0.23385	0.00190387										247.712	0.257014	0.00208652
5.952	2034.86	229.863	8.84707	246.902	0.235147	0.00191668										247.595	0.25858	0.00210179
5.976	2012.98	227.039	8.85634	246.769	0.236963	0.0019314										247.448	0.26075	0.00211943
6	1993.13	224.868	8.86	246.716	0.233655	0.00190506										247.39	0.257175	0.00209111
6.024	1968.57	222.321	8.862	246.687	0.234987	0.00191687										247.358	0.258677	0.00210439
6.048	1946.42	219.226	8.86184	246.69	0.236797	0.00192964										247.361	0.260666	0.00211838
6.072	1922.81	217.132	8.86272	246.677	0.237805	0.00193987										247.347	0.261791	0.00212975
6.096	1901.94	214.528	8.86781	246.604	0.239462	0.00195311										247.266	0.263707	0.00214509
6.12	1878.58	212.132	8.87181	246.546	0.240859	0.0019658										247.203	0.265317	0.00215966
6.144	1858.23	209.679	8.8758	246.489	0.242427	0.00197851										247.14	0.267114	0.00217425
6.168	1835.79	207.302	8.88265	246.39	0.243971	0.00199247										247.031	0.268935	0.00219064
6.192	1814.79	204.377	8.89	246.285	0.2461	0.00200866										246.915	0.271407	0.00220956
6.216	1794.98	201.491	8.90511	246.067	0.24852	0.00202772										246.675	0.274327	0.00223276
6.24	1776.55	199.382	8.92274	245.814	0.245793	0.00200739										246.395	0.271587	0.00221281
6.264	1755.58	197.091	8.942	245.537	0.24779	0.00202622										246.088	0.27407	0.00223609
6.288	1735.65	194.364	8.9601	245.276	0.250246	0.00204653										245.8	0.277027	0.00226071
6.312	1716.45	191.582	8.97806	245.017	0.252835	0.00206732										245.514	0.280113	0.00228573
6.336	1699.36	188.364	8.99393	244.789	0.255941	0.00208923										245.261	0.283735	0.00231165
6.36	1679.98	185.436	9.00903	244.572	0.258718	0.00211046										245.02	0.286973	0.00233667
6.384	1660.04	183.073	9.02666	244.318	0.261026	0.0021308										244.738	0.289703	0.00236083
6.408	1641.75	181.182	9.05053	243.974	0.263145	0.00215169										244.356	0.292255	0.00238597
6.432	1623	179.273	9.07385	243.637	0.265284	0.00217289										243.982	0.294793	0.00241118
6.456	1605.55	177.327	9.09642	243.312	0.267528	0.00219412										243.62	0.297413	0.00243614
6.48	1590.75	175.298	9.11539	243.038	0.265117	0.00217497										243.316	0.294814	0.00241583
6.504	1572.63	172.737	9.13114	242.811	0.267848	0.00219676										243.063	0.297903	0.00244072
6.528	1557.3	169.825	9.14817	242.565	0.271229	0.00222079										242.79	0.301703	0.00246802
6.552	1538.98	167.526	9.16801	242.278	0.273929	0.00224406										242.471	0.30473	0.0024944
6.576	1522.33	165.333	9.18689	242.005	0.276597	0.00226655										242.167	0.307699	0.00251972
6.6	1504.23	162.965	9.20633	241.724	0.279503	0.00229094										241.854	0.31091	0.00254698
6.624	1487.14	161.07	9.2271	241.423	0.281958	0.0023137										241.52	0.313591	0.00257225
6.648	1471.21	158.965	9.24594	241.151	0.284721	0.00233696										241.217	0.316596	0.00259787
6.672	1455.91	156.895	9.2575	240.983	0.287237	0.00235694										241.03	0.319341	0.00261986
6.696	1439.67	155.456	9.26697	240.846	0.2888	0.00237287										240.878	0.321029	0.00263732
6.72	1425.54	153.814	9.27475	240.733	0.285736	0.00234814										240.753	0.317579	0.00260961
6.744	1410.75	151.644	9.28109	240.641	0.288292	0.00236676										240.65	0.320381	0.0026301
6.768	1394.36	149.746	9.28985	240.514	0.290534	0.00238563										240.509	0.322813	0.00265074
6.792	1378.19	148.237	9.29854	240.388	0.292254	0.00240237										240.369	0.324662	0.00266898
6.816	1363.37	146.746	9.30417	240.307	0.293917	0.00241748										240.279	0.326466	0.00268551
6.84	1348.78	145.136	9.31432	240.159	0.295986	0.00243575										240.115	0.32868	0.00270529
6.864	1333.69	143.407	9.3255	239.997	0.298289	0.0024557										239.935	0.331138	0.00272683
6.888	1321.44	141.644	9.33483	239.861	0.300767	0.00247464										239.784	0.333798	0.00274729
6.912	1306.22	139.695	9.34359	239.734	0.303403	0.00249558										239.643	0.336633	0.00276995
6.936	1290.69	138.169	9.35567	239.559	0.305528	0.00251579										239.448	0.338857	0.00279152
6.96	1279.44	136.508	9.37148	239.329	0.303233	0.00249624										239.194	0.336126	0.00276858
6.984	1265.48	134.754	9.38603	239.117	0.305987	0.00251934										238.959	0.338992	0.00279294
7.008	1251.41	133.049	9.40294	238.871	0.308814	0.0025438										238.686	0.341889	0.00281842
7.032	1238.28	131.623	9.4169	238.668	0.311134	0.00256487										238.461	0.344249	0.00284031
7.056	1224.98	129.902	9.43057	238.468	0.313997	0.00258841										238.241	0.347199	0.00286483
7.08	1211.31	127.984	9.44745	238.222	0.31741	0.00261576										237.969	0.350685	0.00289305
7.104	1198.41	126.77	9.46206	238.009	0.319527	0.0026367										237.733	0.352759	0.0029143
7.128	1184.82	124.902	9.47603	237.805	0.322848	0.00266305										237.508	0.356158	0.00294148
7.152	1172.15	123.607	9.48756	237.637	0.32507	0.00268361										237.323	0.358378	0.00296249
7.176	1159.43	122.033	9.50029	237.451	0.327938	0.00270753										237.118	0.361272	0.00298694
7.2	1149.29	120.635	9.51228	237.275	0.325358	0.00268556										236.924	0.358171	0.00296077
7.224	1137.81	119.349	9.5213	237.143	0.327608	0.00270497										236.779	0.360446	0.00298067
7.248	1124.14	117.778	9.53366	236.962	0.330502	0.00272979										236.58	0.363342	0.00300588
7.272	1113.17	116.778	9.54504	236.796	0.332392	0.0027486										236.397	0.365146	0.00302454
7.296	1101.63	115.381	9.55994	236.577	0.335296	0.00277356										236.157	0.367962	0.00304919
7.32	1090.52	114.048	9.57536	236.351	0.338178	0.00279857										235.909	0.37072	0.00307362
7.344	1078.13	112.73	9.59012	236.134	0.340947	0.00282388										235.672	0.373351	0.00309835
7.368	1065.79	111.143	9.60866	235.862	0.344594	0.00285463										235.374	0.376813	0.00312801
7.392	1055.1	109.778	9.62369	235.641	0.347743	0.00288106										235.132	0.379805	0.00315351
7.416	1044.3	108.254	9.64195	235.372	0.351509	0.00291172										234.839	0.383346	0.00318265
7.44	1034.6	106.985	9.66068	235.096	0.349356	0.00289473										234.538	0.380393	0.0031594
7.464	1023.34	105.615	9.67984	234.814	0.352865	0.00292529										234.231	0.383567	0.00318772
7.488	1012.25	103.954	9.69923	234.527	0.357217	0.00295973										233.92	0.387612	0.0032199
7.512	1001.62	103.154	9.71638	234.274	0.35937	0.0029838										233.645	0.389318	0.00324116
7.536	991.6	101.877	9.73565	233.988	0.362975	0.00301481										233.336	0.392487	0.00326906
7.56	980.631	100.538	9.75203	233.746	0.366562	0.00304548										233.074	0.395717	0.00329719
7.584	970.662	99.3231	9.76664	233.529	0.369872	0.0030737										232.84	0.398691	0.003323
7.608	961.462	98.3385	9.78117	233.313	0.372669	0.00309933										232.608	0.401094	0.00334585
7.632	951.631	97.3231	9.79126	233.163	0.375259	0.00312276										232.446	0.403445	0.00336767
7.656	942.723	95.9692	9.80421	232.971	0.379141	0.00315251										232.239	0.407044	0.00339517
7.68	934.582	95.1045	9.81398	232.826	0.375794	0.00312621										232.084	0.403014	0.00336337
7.704	924.582	94.0448	9.82087	232.723	0.378393	0.00314872										231.974	0.405488	0.00338508
7.728	915.97	93	9.83071	232.576	0.381321	0.00317304										231.816	0.408169	0.00340757
7.752	907.09	92.1045	9.84321	232.39	0.383995	0.00319792										231.617	0.410439	0.00342955
7.776	897.448	91.0896	9.85713	232.182	0.387102	0.00322624										231.395	0.413083	0.00345448
7.8	886.985	90.1343	9.86284	232.097	0.38943	0.00324819										231.304	0.415284	0.00347571
7.824	877.478	89.2687	9.86945	231.998	0.391664	0.00326952										231.199	0.417335	0.00349586
7.848	868.94	87.9403	9.87721	231.882	0.395633	0.0032982										231.075	0.421168	0.00352333
7.872	860.194	86.7612	9.88533	231.761	0.399198	0.00332569										230.946	0.42454	0.00354929
7.896	851.119	85.7015	9.89624	231.597	0.402595	0.00335436										230.773	0.427573	0.00357521
7.92	843.609	85.3333	9.9044	231.475	0.397728	0.00332091										230.643	0.421971	0.00353604
7.944	833.71	84.2174	9.91195	231.362	0.401023	0.00334845										230.523	0.425059	0.00356206
7.968	824.957	83.1884	9.9193	231.252	0.404192	0.00337444										230.406	0.428014	0.00358644
7.992	816.246	82.1304	9.92229	231.207	0.407213	0.0033977										230.359	0.431047	0.00360981
8.016	807.594	81.0145	9.92243	231.205	0.410306	0.0034199										230.356	0.434313	0.00363332
8.04	798.681	80.3333	9.92094	231.227	0.411678	0.0034342										230.38	0.435849	0.00364921
8.064	790.594	79.6667	9.92015	231.239	0.413161	0.00344864										230.393	0.437464	0.00366491
8.088	781.638	78.8696	9.91778	231.274	0.414938	0.00346458										230.43	0.439479	0.00368293
8.112	774.435	78.1159	9.91686	231.288	0.416898	0.00348032										230.445	0.441608	0.00370009
8.136	767.13	77.3623	9.91438	231.326	0.418759	0.00349502										230.484	0.44372	0.00371686
8.16	760.225	76.6761	9.91279	231.349	0.414531	0.00345954										230.51	0.43933	0.00367986
8.184	752.211	76.1549	9.91242	231.355	0.415554	0.00347262										230.515	0.440434	0.00369394
8.208	743.845	75.338	9.91828	231.267	0.418201	0.00349658										230.422	0.442907	0.00371671
8.232	736.014	74.2958	9.92478	231.169	0.421946	0.0035252										230.319	0.446498	0.00374409
8.256	728.817	73.5352	9.93388	231.033	0.424866	0.00355111										230.175	0.449054	0.00376728
8.28	721.662	72.5211	9.9427	230.9	0.428912	0.0035819										230.034	0.452803	0.00379565
8.304	713.859	71.831	9.95265	230.751	0.431618	0.00360849										229.877	0.455055	0.0038189
8.328	707.901	70.8732	9.9659	230.551	0.43609	0.00364256										229.667	0.458945	0.00384824
8.352	701.831	70.3099	9.97901	230.354	0.438828	0.00366939										229.459	0.460995	0.00386978
8.376	694.775	69.3803	9.98617	230.246	0.442672	0.0036991										229.345	0.464569	0.00389733
8.4	688.986	68.8082	9.99957	230.043	0.439462	0.00367562										229.133	0.460331	0.00386546
8.424	682.603	68.0959	10.0059	229.948	0.442387	0.00370019										229.034	0.462978	0.00388788
8.448	675.808	67.4247	10.0146	229.816	0.445303	0.00372685										228.896	0.465445	0.00391109
8.472	668.849	66.7671	10.0153	229.806	0.447492	0.00374606										228.885	0.467686	0.00393087
8.496	662.178	66.3151	10.0162	229.792	0.448756	0.00376113										228.87	0.468945	0.00394617
8.52	656.562	65.274	10.016	229.795	0.453068	0.00378751										228.873	0.473464	0.00397395
8.544	649.397	64.8082	10.0163	229.791	0.454313	0.00380305										228.87	0.474749	0.00399013
8.568	642.466	64.0274	10.0198	229.737	0.457528	0.003829										228.813	0.477862	0.00401532
8.592	635.356	63.5616	10.0258	229.646	0.459315	0.00385064										228.718	0.479309	0.00403456
8.616	628.945	62.9452	10.0355	229.499	0.462368	0.00387926										228.565	0.481804	0.00405885
8.64	624.08	62.3333	10.0484	229.305	0.459726	0.00385765										228.363	0.478138	0.0040287
8.664	617.76	61.68	10.0544	229.213	0.462728	0.0038839										228.267	0.480821	0.00405249
8.688	611.853	60.8	10.0674	229.016	0.467741	0.0039228										228.063	0.485071	0.00408516
8.712	606.293	60.0933	10.0824	228.787	0.472134	0.00396006										227.826	0.488489	0.00411453
8.736	599.92	59.2533	10.0986	228.541	0.477351	0.00400322										227.571	0.492636	0.00414901
8.76	593.667	58.6267	10.1158	228.278	0.481544	0.00404282										227.3	0.495592	0.00417866
8.784	588.2	58.0933	10.1307	228.05	0.485167	0.00407747										227.066	0.498111	0.0042044
8.808	582.947	57.36	10.1452	227.829	0.49009	0.00411749										226.839	0.501964	0.00423565
8.832	576.907	56.56	10.1553	227.675	0.49495	0.00415588										226.681	0.50609	0.00426805
8.856	571.48	56.1733	10.1615	227.58	0.496976	0.0041784										226.584	0.507633	0.00428675
8.88	567.143	55.7013	10.166	227.511	0.493093	0.00414583										226.514	0.503283	0.00425012
8.904	561.922	55.2208	10.1704	227.442	0.495619	0.00416917										226.444	0.505474	0.00427082
8.928	556.844	54.7273	10.1765	227.35	0.498447	0.00419482										226.349	0.507834	0.0042927
8.952	551.104	54.1688	10.1773	227.336	0.501085	0.00421741										226.336	0.510446	0.00431519
8.976	546.247	53.7792	10.175	227.372	0.50247	0.00423081										226.373	0.512063	0.00433062
9	541.078	53.1818	10.1775	227.334	0.505731	0.00425651										226.334	0.515167	0.0043551
9.024	536.532	52.7273	10.1783	227.322	0.508009	0.0042757										226.321	0.517414	0.00437412
9.048	531.675	52.1688	10.1804	227.289	0.511125	0.00430023										226.287	0.520396	0.0043976
9.072	526.052	51.7143	10.1823	227.26	0.513338	0.00432221										226.259	0.522483	0.00441869
9.096	521	51.2078	10.183	227.25	0.515968	0.00434428										226.247	0.525096	0.00444071
9.12	517.139	50.6962	10.1909	227.127	0.513096	0.00431851										226.123	0.521453	0.00440834
9.144	511.481	50.1899	10.2022	226.953	0.516765	0.00435419										225.946	0.524142	0.00443602
9.168	507.266	49.7342	10.2106	226.825	0.520122	0.00438367										225.816	0.52677	0.00445952
9.192	502.785	49.3165	10.2165	226.734	0.522906	0.00440957										225.724	0.529035	0.0044812
9.216	498.127	48.9241	10.2282	226.552	0.526132	0.00444236										225.54	0.531172	0.00450504
9.24	493.684	48.1899	10.2403	226.366	0.532208	0.00448776										225.353	0.536134	0.00454119
9.264	488.861	47.4684	10.2489	226.233	0.537856	0.0045298										225.219	0.540966	0.00457651
9.288	484.38	47.1772	10.2575	226.099	0.540126	0.00455642										225.084	0.542382	0.00459608
9.312	479.835	46.7848	10.2658	225.971	0.543206	0.0045867										224.956	0.544637	0.00461953
9.336	475.582	46.1646	10.2764	225.806	0.548642	0.00462888										224.79	0.548985	0.0046527
9.36	472.062	45.8025	10.288	225.625	0.545379	0.00460432										224.61	0.544516	0.00461782
9.384	467.37	45.3951	10.2949	225.519	0.548504	0.00463458										224.503	0.546915	0.00464205
9.408	462.481	44.963	10.3	225.439	0.551629	0.00466417										224.424	0.549486	0.00466706
9.432	458.235	44.5309	10.3083	225.31	0.555348	0.0046976										224.296	0.552306	0.00469299
9.456	453.864	44.0123	10.3189	225.145	0.560175	0.00473842										224.132	0.555953	0.00472396
9.48	449.667	43.6173	10.3266	225.025	0.563623	0.00477059										224.013	0.558526	0.0047488
9.504	445.037	43.1235	10.3349	224.894	0.56802	0.00480887										223.884	0.561949	0.00477895
9.528	440.926	42.5802	10.3455	224.728	0.573419	0.00485248										223.72	0.566084	0.00481202
9.552	436.951	42.1852	10.3595	224.51	0.577933	0.00489501										223.504	0.568926	0.00484041
9.576	433.346	41.7778	10.3753	224.26	0.583012	0.0049411										223.259	0.572055	0.00486999
9.6	429.976	41.3976	10.3907	224.018	0.580791	0.00492535										223.021	0.568046	0.00483879
9.624	425.952	40.9639	10.4111	223.697	0.586741	0.00498101										222.708	0.571396	0.00487228
9.648	421.759	40.506	10.4298	223.401	0.592801	0.0050368										222.42	0.57497	0.00490683
9.672	417.578	40	10.4446	223.166	0.598965	0.00508998										222.193	0.579069	0.00494245
9.696	413.675	39.5301	10.4589	222.939	0.604887	0.00514127										221.973	0.582941	0.00497629
9.72	409.675	39.0843	10.4724	222.725	0.610502	0.00519111										221.768	0.586581	0.00500922
9.744	405.458	38.494	10.4842	222.535	0.617596	0.00524717										221.586	0.591799	0.00504953
9.768	401.639	38.1566	10.4934	222.389	0.62161	0.00528595										221.445	0.594392	0.00507602
9.792	397.53	37.7952	10.5036	222.226	0.626013	0.00532866										221.29	0.597201	0.00510491
9.816	393.88	37.4578	10.5104	222.117	0.629841	0.00536436										221.186	0.599898	0.00513084
9.84	390.247	37.0941	10.5161	222.025	0.626384	0.00533624										221.098	0.595803	0.00509698
9.864	386.906	36.7882	10.5246	221.889	0.630254	0.00537308										220.969	0.598289	0.0051218
9.888	383.412	36.5176	10.5309	221.788	0.633328	0.00540484										220.874	0.600316	0.00514433
9.912	379.6	36.0706	10.5397	221.647	0.638968	0.00545213										220.74	0.604394	0.00517831
9.936	376.424	35.8	10.5547	221.405	0.643673	0.00549991										220.512	0.606645	0.00520452
9.96	372.941	35.4235	10.574	221.092	0.650451	0.00556326										220.218	0.610139	0.00523921
9.984	369.129	34.9059	10.5942	220.766	0.659307	0.00563882										219.912	0.615354	0.00528333
10.008	365.576	34.4824	10.6121	220.474	0.666826	0.00570577										219.64	0.619548	0.00532135
10.032	362.424	34.1176	10.631	220.166	0.674009	0.00577143										219.355	0.623194	0.00535605
10.056	359.329	33.6353	10.6487	219.876	0.682886	0.00584394										219.088	0.62849	0.0053978
10.08	356.368	33.2184	10.6651	219.608	0.682846	0.00584249										218.841	0.625733	0.00537258
10.104	352.885	32.8506	10.6783	219.391	0.689322	0.00590111										218.643	0.629439	0.00540691
10.128	349.897	32.6552	10.6933	219.143	0.693856	0.00595174										218.416	0.630996	0.00543053
10.152	346.678	32.3793	10.7069	218.917	0.699328	0.00600638										218.212	0.633593	0.00545939
10.176	343.609	32.0575	10.7237	218.638	0.70632	0.00607193										217.96	0.636937	0.00549252
10.2	340.759	31.8621	10.7384	218.396	0.711073	0.00612416										217.741	0.638585	0.00551638
10.224	336.874	31.5632	10.7468	218.255	0.715837	0.00617342										217.615	0.641315	0.005547
10.248	333.448	31.046	10.7579	218.069	0.725089	0.00624525										217.449	0.647533	0.00559316
10.272	330.092	30.7011	10.7773	217.744	0.733446	0.00632442										217.159	0.651301	0.00563121
10.296	326.966	30.2529	10.7984	217.39	0.744314	0.0064174										216.846	0.656834	0.00567736
10.32	324.337	29.9101	10.8251	216.938	0.746611	0.00644343										216.449	0.653551	0.00565305
10.344	321.348	29.6966	10.8509	216.499	0.754898	0.00653274										216.066	0.655534	0.00568424
10.368	318.36	29.3034	10.8838	215.936	0.768485	0.00665876										215.58	0.660386	0.00573157
10.392	315.449	28.8652	10.906	215.555	0.780808	0.00676423										215.253	0.666142	0.00577895
10.416	312.056	28.5281	10.9302	215.135	0.791795	0.00687064										214.897	0.670089	0.00582102
10.44	308.843	28.0449	10.9519	214.758	0.805532	0.0069865										214.579	0.676705	0.00587407
10.464	305.685	27.8427	10.9717	214.412	0.813332	0.00707264										214.289	0.678597	0.00590439
10.488	302.899	27.4494	10.9903	214.085	0.825293	0.00717556										214.017	0.684069	0.00594957
10.512	300.157	27.3258	11.0037	213.85	0.830184	0.00723701										213.823	0.684846	0.0059708
10.536	297.742	27.0225	11.0136	213.673	0.838319	0.00730647										213.677	0.689067	0.00600554
10.56	295.462	26.7473	11.0178	213.599	0.835013	0.00727407										213.616	0.685295	0.00596934
10.584	292.692	26.4615	11.016	213.631	0.839201	0.00730624										213.643	0.689194	0.00599993
10.608	289.824	26.2857	11.0201	213.559	0.842638	0.00734637										213.584	0.690992	0.00602358
10.632	286.648	26.033	11.0237	213.495	0.84756	0.00739482										213.531	0.694108	0.00605496
10.656	283.835	25.7143	11.0367	213.264	0.857221	0.00748113										213.342	0.698664	0.00609513
10.68	281.505	25.6264	11.0455	213.106	0.860545	0.0075277										213.214	0.699063	0.00611204
10.704	279.033	25.3846	11.0511	213.005	0.866532	0.00758201										213.132	0.702436	0.00614255
10.728	276.44	25.0769	11.0522	212.986	0.872705	0.00762948										213.117	0.707159	0.00617844
10.752	274.187	24.7582	11.058	212.882	0.881051	0.00769448										213.032	0.712352	0.00621679
10.776	271.209	24.3736	11.0653	212.752	0.891249	0.00777614										212.927	0.718615	0.00626476
10.8	268.925	24.1935	11.0712	212.646	0.886634	0.0077424										212.842	0.713275	0.00622284
10.824	266.484	23.9892	11.0804	212.48	0.893338	0.00780867										212.708	0.716123	0.00625291
10.848	263.839	23.828	11.0887	212.33	0.89854	0.00786808										212.588	0.717966	0.00627924
10.872	261.032	23.5376	11.0977	212.166	0.907477	0.00794837										212.457	0.722535	0.00631982
10.896	258.065	23.2688	11.1066	212.005	0.915812	0.00802733										212.329	0.726616	0.00635924
10.92	255.731	23.0323	11.1103	211.938	0.922028	0.00808133										212.276	0.730479	0.00639225
10.944	253.194	22.8387	11.1196	211.768	0.92896	0.00815274										212.142	0.733229	0.00642362
10.968	250.634	22.6129	11.1281	211.614	0.936629	0.00822666										212.02	0.736755	0.0064587
10.992	248.419	22.3333	11.1433	211.333	0.948894	0.00833564										211.801	0.74175	0.00650158
11.016	245.667	21.9892	11.1599	211.029	0.963548	0.00846437										211.563	0.74804	0.00655462
11.04	243.453	21.8	11.1747	210.754	0.963194	0.00847344										211.35	0.743089	0.00651866
11.064	240.537	21.4421	11.1868	210.529	0.97698	0.00859117										211.178	0.749836	0.00657351
11.088	238.063	21.2526	11.1994	210.295	0.986175	0.00868586										210.998	0.752778	0.00660808
11.112	235.937	20.9895	11.2161	209.98	1.00015	0.00881208										210.759	0.757824	0.00665232
11.136	233.863	20.7474	11.2265	209.784	1.01108	0.00890861										210.61	0.762541	0.00669237
11.16	231.474	20.5684	11.2284	209.748	1.01595	0.00895775										210.584	0.765564	0.00672329
11.184	229.095	20.3895	11.2356	209.612	1.02325	0.0090327										210.481	0.768556	0.00675638
11.208	226.495	20.1789	11.2428	209.476	1.03156	0.00911506										210.379	0.772284	0.00679473
11.232	224.768	19.9474	11.2516	209.308	1.04246	0.009207										210.254	0.777269	0.00683397
11.256	222.274	19.7789	11.2485	209.367	1.04486	0.0092337										210.298	0.780171	0.00686407
11.28	220.165	19.6701	11.2473	209.39	1.03545	0.00916163										210.315	0.773576	0.00681445
11.304	217.979	19.3814	11.2444	209.446	1.04284	0.00920998										210.357	0.780156	0.00686022
11.328	215.68	19.0928	11.2371	209.583	1.04834	0.00923919										210.46	0.78687	0.00690593
11.352	213.515	18.8969	11.2324	209.673	1.05165	0.00926371										210.527	0.791043	0.00693984
11.376	211.309	18.8557	11.2246	209.82	1.04742	0.0092448										210.638	0.79064	0.00695127
11.4	209.041	18.567	11.2204	209.9	1.05465	0.00929097										210.698	0.797608	0.00699989
11.424	207.072	18.4536	11.2176	209.951	1.0559	0.00930987										210.737	0.799526	0.0070231
11.448	204.608	18.3402	11.2113	210.071	1.05499	0.00931424										210.828	0.801091	0.00704724
11.472	202.371	18.1134	11.2009	210.266	1.05725	0.00932112										210.976	0.806485	0.00708633
11.496	200.474	17.9278	11.1903	210.465	1.05818	0.00931782										211.128	0.810946	0.00711834
11.52	199.071	17.7879	11.1917	210.438	1.05236	0.00926524										211.108	0.805985	0.00707359
11.544	197.323	17.6768	11.1873	210.519	1.05318	0.00927664										211.17	0.808133	0.00709629
11.568	195.313	17.4747	11.1845	210.571	1.0583	0.00931562										211.21	0.813047	0.00713514
11.592	193.374	17.2929	11.1936	210.402	1.068	0.00940707										211.08	0.817269	0.00717549
11.616	191.333	17.1111	11.2046	210.197	1.07858	0.00950966										210.924	0.82144	0.00721754
11.64	189.646	16.899	11.2125	210.049	1.08982	0.00960409										210.811	0.827104	0.00726256
11.664	187.98	16.7677	11.2251	209.81	1.09978	0.00970622										210.631	0.829969	0.00729642
11.688	185.828	16.6061	11.2353	209.618	1.10958	0.00980758										210.485	0.833521	0.00733709
11.712	183.97	16.3434	11.2436	209.46	1.12395	0.00992284										210.367	0.841116	0.00739383
11.736	182.051	16.1212	11.2476	209.385	1.13441	0.0100083										210.311	0.847407	0.00744332
11.76	180.644	16.0297	11.248	209.378	1.12602	0.00994133										210.306	0.840992	0.00739215
11.784	178.822	15.7822	11.2465	209.404	1.13541	0.0100053										210.326	0.848558	0.00744475
11.808	177.05	15.703	11.2478	209.381	1.13771	0.0100428										210.308	0.849789	0.00746817
11.832	175.495	15.5743	11.2597	209.153	1.14834	0.0101496										210.139	0.852995	0.00750384
11.856	173.832	15.4851	11.2653	209.047	1.15357	0.0102137										210.06	0.854668	0.0075307
11.88	172.109	15.3861	11.2625	209.099	1.15499	0.0102355										210.099	0.856811	0.00755697
11.904	170.545	15.2178	11.2618	209.114	1.16143	0.0102856										210.109	0.861892	0.00759674
11.928	168.812	15.0396	11.2549	209.245	1.16511	0.0103064										210.207	0.867386	0.00763769
11.952	167.584	14.802	11.2565	209.215	1.17738	0.0103871										210.185	0.875896	0.00769171
11.976	166.287	14.6931	11.257	209.205	1.18194	0.0104291										210.177	0.879055	0.00772072
12	164.893	14.6408	11.2629	209.092	1.17439	0.0103846										210.093	0.871039	0.0076655
12.024	163.34	14.5049	11.2711	208.936	1.18419	0.0104795										209.977	0.874948	0.00770448
12.048	161.835	14.3786	11.2778	208.807	1.19288	0.0105647										209.882	0.878569	0.00774118
12.072	160.388	14.2039	11.2904	208.563	1.20802	0.0106999										209.703	0.884346	0.00779046
12.096	159.155	14.1165	11.2992	208.394	1.21627	0.0107873										209.58	0.886633	0.00781915
12.12	157.631	13.9612	11.3109	208.167	1.23015	0.0109171										209.415	0.891612	0.00786557
12.144	156.107	13.8447	11.3215	207.959	1.24125	0.0110314										209.264	0.894905	0.00790373
12.168	154.864	13.7282	11.3329	207.735	1.25351	0.0111507										209.104	0.898567	0.00794098
12.192	153.573	13.5146	11.3435	207.527	1.27188	0.0112985										208.955	0.906836	0.00800068
12.216	152.087	13.3204	11.3492	207.414	1.28603	0.0114128										208.874	0.914223	0.00805652
12.24	150.981	13.1905	11.3504	207.391	1.28138	0.0113636										208.858	0.910377	0.00801675
12.264	149.562	13.1429	11.3492	207.416	1.28135	0.0113835										208.875	0.910932	0.00803616
12.288	148.133	13.0095	11.3501	207.396	1.2887	0.0114476										208.862	0.915684	0.00807704
12.312	146.638	12.8952	11.35	207.399	1.29394	0.011499										208.864	0.91948	0.00811393
12.336	145.343	12.8	11.3438	207.521	1.29438	0.0115016										208.951	0.922734	0.00814311
12.36	143.829	12.7429	11.3374	207.647	1.29159	0.0114923										209.041	0.923754	0.00816457
12.384	142.524	12.6381	11.3202	207.984	1.28596	0.0114269										209.283	0.927742	0.00819262
12.408	141.457	12.5333	11.3129	208.128	1.28702	0.0114253										209.387	0.931913	0.00822319
12.432	140.076	12.419	11.3049	208.283	1.28791	0.0114272										209.499	0.936215	0.00825848
12.456	138.771	12.2857	11.2908	208.556	1.28676	0.0113966										209.699	0.941836	0.00829625
12.48	137.972	12.1589	11.2794	208.775	1.27587	0.0112714										209.859	0.938968	0.00825228
12.504	136.243	12.1028	11.2709	208.938	1.27175	0.0112555										209.979	0.939706	0.00827558
12.528	135.056	11.9533	11.2585	209.176	1.27354	0.011245										210.156	0.946528	0.00831866
12.552	133.794	11.8411	11.2431	209.47	1.27084	0.0112053										210.375	0.951283	0.00835161
12.576	132.495	11.8131	11.229	209.737	1.26258	0.0111452										210.575	0.951162	0.00836279
12.6	131.402	11.7009	11.2121	210.056	1.25976	0.0110988										210.817	0.956251	0.00839446
12.624	130.14	11.6262	11.1852	210.56	1.24875	0.0109872										211.201	0.959099	0.00841306
12.648	128.794	11.5607	11.1618	210.994	1.2391	0.0108969										211.536	0.961197	0.00843127
12.672	127.477	11.4673	11.1324	211.535	1.22906	0.0107887										211.958	0.965092	0.00845461
12.696	126.215	11.3458	11.0992	212.14	1.22003	0.0106763										212.437	0.970851	0.00848392
12.72	125.358	11.2844	11.0762	212.555	1.20129	0.0104966										212.768	0.964522	0.00841935
12.744	124.101	11.2294	11.0456	213.105	1.18939	0.0103836										213.213	0.966171	0.00843059
12.768	123.018	11.1835	11.0286	213.408	1.18336	0.0103323										213.46	0.967366	0.00844429
12.792	121.835	11.1009	11.0149	213.65	1.18143	0.0103114										213.658	0.970628	0.00847124
12.816	121.073	11.0734	10.9975	213.959	1.17471	0.0102509										213.913	0.971212	0.00847691
12.84	120.202	10.9633	10.9729	214.39	1.17137	0.0101917										214.271	0.976889	0.00850439
12.864	119.119	10.9358	10.9498	214.795	1.16205	0.0101136										214.61	0.976928	0.00850978
12.888	118.046	10.7248	10.93	215.139	1.1684	0.0101175										214.9	0.988875	0.00857244
12.912	116.862	10.633	10.9194	215.323	1.16897	0.0101187										215.056	0.992889	0.00860522
12.936	115.358	10.5596	10.9161	215.38	1.17025	0.0101475										215.104	0.995057	0.00863939
12.96	114.414	10.5405	10.919	215.331	1.16017	0.0100839										215.062	0.985552	0.00857682
12.984	113.333	10.4414	10.9246	215.234	1.16779	0.0101548										214.98	0.990168	0.00862043
13.008	112.441	10.3784	10.933	215.088	1.17411	0.010223										214.856	0.992712	0.00865289
13.032	111.378	10.2342	10.9299	215.142	1.18228	0.0102761										214.903	1.00068	0.00870739
13.056	110.577	10.1081	10.917	215.365	1.18597	0.0102798										215.091	1.00813	0.0087494
13.08	109.649	10	10.913	215.435	1.19139	0.0103155										215.151	1.0141	0.008792
13.104	108.568	9.84685	10.9119	215.452	1.20165	0.0103844										215.166	1.02318	0.00885388
13.128	107.676	9.8018	10.9148	215.402	1.2046	0.0104249										215.123	1.0247	0.00887956
13.152	106.856	9.73874	10.9218	215.282	1.21091	0.0104896										215.021	1.0277	0.00891328
13.176	105.658	9.73874	10.9241	215.242	1.20887	0.0105133										214.987	1.02517	0.00892624
13.2	104.947	9.64602	10.9171	215.362	1.20188	0.0104368										215.089	1.02161	0.00888261
13.224	104.212	9.61062	10.9081	215.518	1.1997	0.010422										215.222	1.0228	0.00889748
13.248	103.274	9.48673	10.8957	215.732	1.20371	0.0104328										215.405	1.03042	0.00894438
13.272	102.345	9.38053	10.8847	215.922	1.20685	0.010443										215.567	1.0368	0.00898635
13.296	101.265	9.28319	10.8705	216.166	1.20768	0.010439										215.777	1.04226	0.00902542
13.32	100.363	9.23894	10.8677	216.213	1.20842	0.0104577										215.818	1.04382	0.0090498
13.344	99.5221	9.15929	10.861	216.328	1.21119	0.0104752										215.917	1.04844	0.00908493
13.368	98.7699	9.0708	10.8553	216.425	1.21548	0.0105002										216.002	1.05406	0.00912355
13.392	97.6814	8.99115	10.847	216.566	1.21713	0.0105155										216.125	1.05823	0.0091614
13.416	96.6726	8.93805	10.8363	216.747	1.21557	0.0105089										216.282	1.06038	0.00918702
13.44	95.9565	8.86957	10.82	217.025	1.20367	0.0103918										216.525	1.05529	0.00913185
13.464	95	8.7913	10.8099	217.196	1.20503	0.0103994										216.675	1.05974	0.00916752
13.488	94.0261	8.72174	10.8054	217.272	1.20758	0.0104261										216.742	1.06342	0.00920382
13.512	93.4	8.65217	10.7907	217.518	1.20751	0.010409										216.959	1.06802	0.0092303
13.536	92.6348	8.58261	10.7845	217.624	1.21011	0.0104269										217.053	1.07232	0.0092639
13.56	91.8	8.55652	10.7832	217.645	1.2099	0.0104452										217.072	1.07254	0.00928373
13.584	91.4348	8.50435	10.7849	217.617	1.21478	0.0104811										217.047	1.07632	0.0093109
13.608	90.7652	8.3913	10.7908	217.517	1.22669	0.0105673										216.959	1.08497	0.00937053
13.632	89.7391	8.36522	10.797	217.413	1.22865	0.0106187										216.866	1.08469	0.00939809
13.656	88.8957	8.23478	10.7972	217.41	1.2401	0.0106952										216.864	1.09475	0.00946538
13.68	88.0769	8.15385	10.7932	217.478	1.23424	0.0106391										216.923	1.09088	0.00942738
13.704	87.5299	8.07692	10.801	217.345	1.24389	0.0107171										216.806	1.09682	0.00947355
13.728	86.6923	7.97436	10.8068	217.248	1.25488	0.0108053										216.721	1.1046	0.00953442
13.752	86.0513	7.93162	10.807	217.244	1.25779	0.0108379										216.717	1.10708	0.0095625
13.776	85.265	7.89744	10.8166	217.083	1.26278	0.0109067										216.576	1.10827	0.00959463
13.8	84.6154	7.87179	10.8291	216.871	1.26841	0.0109822										216.39	1.10896	0.00962306
13.824	84.0256	7.76923	10.8367	216.741	1.28145	0.011079										216.277	1.11772	0.00968427
13.848	83.4701	7.71795	10.8459	216.585	1.28934	0.0111553										216.14	1.12139	0.00972219
13.872	82.8547	7.65812	10.8523	216.476	1.29702	0.011226										216.046	1.12583	0.00976365
13.896	82.3077	7.59829	10.8758	216.074	1.31208	0.0113728										215.698	1.13042	0.00981534
13.92	81.8571	7.48739	10.9166	215.372	1.3305	0.0115345										215.097	1.13114	0.00981874
13.944	81.0504	7.44538	10.9618	214.586	1.35312	0.0117904										214.435	1.13288	0.00987829
13.968	80.521	7.36134	11.0065	213.799	1.38339	0.0120792										213.781	1.14003	0.00995511
13.992	79.8992	7.30252	11.0569	212.902	1.41437	0.0124006										213.048	1.14403	0.0100235
14.016	79.3445	7.14286	11.1009	212.108	1.45857	0.0127718										212.412	1.15986	0.0101417
14.04	78.7143	7	11.1465	211.276	1.5037	0.0131658										211.756	1.17392	0.0102552
14.064	77.9664	6.93277	11.1843	210.575	1.53442	0.0134791										211.213	1.17892	0.0103249
14.088	77.2521	6.83193	11.2175	209.954	1.56923	0.0138011										210.739	1.18829	0.0104118
14.112	76.5294	6.73109	11.2397	209.534	1.59806	0.0140577										210.423	1.19806	0.0104945
14.136	75.7983	6.70588	11.2652	209.048	1.61728	0.014287										210.061	1.19826	0.0105344
14.16	75.3058	6.64463	11.2822	208.722	1.62462	0.0143618										209.82	1.19405	0.0105003
14.184	74.6612	6.57851	11.2903	208.566	1.63937	0.0144965										209.705	1.2002	0.0105554
14.208	74.1074	6.58678	11.3008	208.363	1.6433	0.0145867										209.557	1.19699	0.0105645
14.232	73.3802	6.56198	11.3042	208.296	1.64693	0.0146528										209.509	1.19761	0.0105936
14.256	72.8017	6.4876	11.2983	208.411	1.65297	0.0146817										209.593	1.2055	0.0106469
14.28	72.157	6.38843	11.3	208.379	1.66937	0.0147981										209.569	1.21646	0.010722
14.304	71.4711	6.30579	11.2993	208.392	1.68097	0.0148831										209.579	1.22532	0.0107874
14.328	70.9835	6.24793	11.2924	208.526	1.68415	0.0148902										209.676	1.23177	0.0108308
14.352	70.3223	6.19835	11.2913	208.546	1.68958	0.0149436										209.691	1.23635	0.0108752
14.376	69.6942	6.16529	11.3012	208.354	1.70061	0.0150728										209.551	1.23846	0.010914
14.4	69.2195	6.11382	11.3088	208.207	1.70043	0.0150742										209.444	1.23372	0.0108723
14.424	68.6911	6.06504	11.312	208.146	1.70992	0.0151611										209.399	1.23869	0.0109171
14.448	68.0976	6.04065	11.3152	208.083	1.71431	0.0152277										209.354	1.23988	0.0109466
14.472	67.439	6	11.3253	207.886	1.72734	0.0153728										209.212	1.24303	0.0109925
14.496	66.8293	5.9187	11.3406	207.584	1.7539	0.0156087										208.995	1.25234	0.0110698
14.52	66.2683	5.86179	11.3583	207.234	1.77834	0.0158465										208.747	1.25825	0.0111308
14.544	65.6748	5.79675	11.3727	206.949	1.80212	0.0160692										208.546	1.26547	0.0111976
14.568	65.2602	5.73984	11.3843	206.715	1.82326	0.0162574										208.382	1.27234	0.0112543
14.592	64.8211	5.65041	11.408	206.237	1.86412	0.016612										208.051	1.28409	0.0113433
14.616	64.4065	5.5935	11.4311	205.766	1.89859	0.0169375										207.728	1.2909	0.0114075
14.64	64.024	5.568	11.4379	205.628	1.89414	0.0169168										207.634	1.28288	0.0113468
14.664	63.368	5.52	11.4399	205.586	1.90383	0.0170158										207.606	1.28794	0.0113991
14.688	62.768	5.48	11.4405	205.574	1.91047	0.0170885										207.598	1.292	0.0114439
14.712	62.376	5.408	11.4324	205.741	1.91733	0.0170974										207.711	1.30273	0.0115067
14.736	61.792	5.376	11.4137	206.121	1.90232	0.0169513										207.971	1.30623	0.0115361
14.76	61.192	5.384	11.3953	206.494	1.87802	0.0167656										208.228	1.30274	0.011533
14.784	60.624	5.352	11.3873	206.656	1.87439	0.0167384										208.341	1.30594	0.0115678
14.808	60.216	5.312	11.3787	206.828	1.8734	0.0167116										208.461	1.31131	0.0116058
14.832	59.56	5.28	11.3623	207.155	1.86156	0.0166063										208.691	1.31439	0.0116389
14.856	59.04	5.24	11.3404	207.589	1.84799	0.016457										208.999	1.3197	0.0116731
14.88	58.7874	5.19685	11.3231	207.928	1.82713	0.0162237										209.242	1.31628	0.0116142
14.904	58.3071	5.11024	11.3118	208.149	1.83598	0.0162394										209.402	1.33011	0.0116946
14.928	57.7323	5.07087	11.3143	208.1	1.84443	0.0163295										209.366	1.33458	0.0117442
14.952	57.0787	5.06299	11.321	207.969	1.84793	0.0164233										209.272	1.33266	0.0117702
14.976	56.7323	5.02362	11.3296	207.8	1.86357	0.0165665										209.15	1.33812	0.0118186
15	56.252	4.97638	11.3377	207.641	1.88014	0.0167214										209.037	1.3445	0.0118778
15.024	55.7638	4.96063	11.3438	207.522	1.88653	0.0168184										208.951	1.34487	0.0119075
15.048	55.4331	4.88189	11.3365	207.665	1.89893	0.0168617										209.054	1.35878	0.0119853
15.072	55.0709	4.82677	11.3306	207.781	1.90619	0.0168904										209.137	1.36806	0.0120436
15.096	54.6378	4.80315	11.3395	207.605	1.91802	0.0170262										209.011	1.3703	0.0120823
	54.4031	4.7907	11.3429
	53.9845	4.74419	11.3437
	53.5736	4.72868	11.3407
	53.1783	4.69767	11.3263
	52.8062	4.64341	11.3081
	52.4341	4.62791	11.2935
	51.9147	4.58915	11.2818
	51.3488	4.5814	11.2679
	50.7752	4.53488	11.257
	50.5736	4.51163	11.2531
	50.1679	4.47328	11.2438
	49.7939	4.43511	11.2391
	49.3588	4.39695	11.2325
	48.8626	4.35878	11.2402
	48.5496	4.30534	11.2561
	48.0916	4.26718	11.2756
	47.8702	4.24427	11.2978
	47.5344	4.22901	11.3177
	47.1527	4.17557	11.3435
	46.7863	4.1145	11.3713
	46.5564	4.07519	11.3905
	46.1805	4.03008	11.411
	45.8722	4.00752	11.4396
	45.5188	3.95489	11.47
	45.1955	3.92481	11.4965
	44.7444	3.89474	11.5127
	44.3383	3.85714	11.5275
	44.0226	3.79699	11.5557
	43.6842	3.77444	11.5878
	43.3759	3.74436	11.6048
	43.1185	3.73333	11.6201
	43	3.71111	11.6404
	42.7185	3.62963	11.6507
	42.3926	3.59259	11.6532
	42.1037	3.6	11.6572
	41.7185	3.57037	11.6673
	41.4667	3.54074	11.6747
	41.0148	3.53333	11.6883
	40.7185	3.5037	11.696
	40.363	3.47407	11.6842
	40.1241	3.43066	11.6855
	39.7299	3.41606	11.6898
	39.4088	3.35766	11.692
	39.1095	3.29927	11.6994
	38.7591	3.32117	11.706
	38.4599	3.28467	11.7072
	38.1095	3.24818	11.7103
	37.8613	3.22628	11.721
	37.6277	3.21898	11.7205
	37.3869	3.19708	11.7136
	37.2374	3.20144	11.7272
	36.964	3.15108	11.7476
	36.7626	3.1295	11.7523
	36.4604	3.10791	11.7529
	36.2662	3.07914	11.7586
	35.9712	3.04317	11.7594
	35.7986	3	11.7716
	35.5252	3.01439	11.7862
	35.3094	3.00719	11.8081
	35.0863	2.98561	11.8336
	34.8582	2.97872	11.8406
	34.5461	2.93617	11.8399
	34.2411	2.87943	11.8231
	34.1773	2.85106	11.8174
	33.9078	2.8227	11.8166
	33.6312	2.83688	11.8192
	33.4255	2.82979	11.8211
	33.1631	2.8227	11.8095
	32.922	2.80851	11.7909
	32.7872	2.79433	11.7707
	32.6224	2.76923	11.7588
	32.3007	2.75524	11.7678
	32.0629	2.75524	11.7778
	31.8741	2.72727	11.7903
	31.6783	2.69231	11.8022
	31.4056	2.64336	11.8091
	31.1818	2.60839	11.8123
	31.014	2.6014	11.8234
	30.6713	2.58042	11.85
	30.4196	2.56643	11.8771
